# Supplementary material for: Intercomparison between the Integrated Urban land Model and theNoah Urban Canopy Model
Source: Copernicus journal article supplement (doi:10.5194/gmd-2019-298), 2020-02-24
Supplement: Supplementary file 1 [file daqisuo.xls]

## Sheet: daqisuo
TOA5	1876	2
TIMESTAMP	LE_wpl	Hs	LE_irga	Ts_1_Avg	press_1_Avg	rho_a_Avg	wnd_dir_cmpss_1	wnd_dir_csat3_1	wnd_spd_1	rslt_wnd_spd_1
TS	W/m^2	W/m^2	W/m^2	C	kPa	kg/m^3	degrees	degrees	m/s	m/s
	Smp	Smp	Smp	Avg	Avg	Avg	Smp	Smp	Smp	Smp
2015-01-01	2.62592	-16.3062	2.6352	-2.30032	101.297	1.30289	205.808	154.192	4.10224	3.92765
2015-01-01 00:30:00	1.39464	-4.9787	1.39753	-2.15225	101.303	1.30226	205.751	154.249	3.74168	3.55233
2015-01-01 01:00:00	3.3492	-22.3236	3.36141	-2.32889	101.309	1.30319	220.529	139.471	3.53023	3.2778
2015-01-01 01:30:00	1.01223	-13.4629	1.01918	-2.47802	101.322	1.30408	219.854	140.146	2.99638	2.76013
2015-01-01 02:00:00	2.84891	-12.3886	2.85292	-2.16606	101.323	1.3026	213.077	146.923	3.56488	3.30085
2015-01-01 02:30:00	3.48155	-15.2906	3.48404	-2.10843	101.345	1.30263	214.196	145.804	3.9049	3.7085
2015-01-01 03:00:00	2.17929	-1.57828	2.17948	-2.07969	101.353	1.30259	208.562	151.438	3.71264	3.44209
2015-01-01 03:30:00	3.56236	-11.1555	3.5643	-2.28228	101.365	1.30372	214.145	145.855	3.73726	3.4377
2015-01-01 04:00:00	5.57319	-10.1595	5.57758	-2.937	101.371	1.30692	226.706	133.294	2.307	2.07171
2015-01-01 04:30:00	5.91657	-2.9063	5.91742	-3.39557	101.358	1.30898	227.734	132.266	3.31227	3.19576
2015-01-01 05:00:00	2.81728	-7.60294	2.81953	-3.59113	101.32	1.30946	218.441	141.559	3.99177	3.84482
2015-01-01 05:30:00	4.07504	-3.87702	4.07576	-3.63408	101.315	1.3096	216.261	143.739	2.23405	2.10764
2015-01-01 06:00:00	2.80725	-10.3587	2.8085	-3.88436	101.339	1.31115	229.636	130.364	2.33836	2.22073
2015-01-01 06:30:00	2.33523	-5.6922	2.33595	-3.9476	101.349	1.31157	221.383	138.617	1.9718	1.86071
2015-01-01 07:00:00	2.39977	-5.59814	2.40148	-4.21403	101.364	1.31306	219.568	140.432	1.07342	0.9366
2015-01-01 07:30:00	1.18107	-7.70652	1.18448	-4.51241	101.364	1.31451	254.417	105.583	1.31106	1.24666
2015-01-01 08:00:00	2.81655	-2.97452	2.81751	-4.64335	101.362	1.31512	268.978	91.022	1.64043	1.59401
2015-01-01 08:30:00	5.7112	-2.04682	5.71132	-4.70739	101.376	1.31564	269.572	90.4281	2.24446	2.17302
2015-01-01 09:00:00	3.6084	7.97845	3.60921	-4.71425	101.377	1.31571	251.002	108.998	2.33867	2.28314
2015-01-01 09:30:00	-0.200572	25.9552	-0.194927	-4.53892	101.354	1.31456	246.107	113.893	2.33724	2.27441
2015-01-01 10:00:00	-0.47223	-0.886332	-0.47257	-4.16091	101.33	1.31242	242.654	117.346	1.75864	1.54302
2015-01-01 10:30:00	-0.500688	-16.457	-0.505529	-3.59142	101.298	1.30923	284.855	75.1446	0.651808	0.176071
2015-01-01 11:00:00	1.6123	44.2447	1.62178	-2.72628	101.227	1.30411	26.0753	-26.0753	1.10943	0.607814
2015-01-01 11:30:00	6.36934	92.4885	6.35212	-2.3103	101.175	1.30141	68.4706	-68.4706	1.6925	1.39326
2015-01-01 12:00:00	17.0173	88.0387	17.0362	-1.5595	101.107	1.29697	84.7599	-84.7599	3.15733	2.89777
2015-01-01 12:30:00	14.6645	163.859	14.7211	-1.22497	101.027	1.29436	93.7342	-93.7342	3.83159	3.71633
2015-01-01 13:00:00	12.8395	141.139	12.9005	-0.90482	100.938	1.29171	92.6805	-92.6805	4.00363	3.8553
2015-01-01 13:30:00	6.40852	157.481	6.47127	-0.561496	100.828	1.28867	76.6745	-76.6745	4.20303	4.00447
2015-01-01 14:00:00	14.1327	163.363	14.1816	-0.294215	100.768	1.28664	94.407	-94.4069	4.54864	4.26619
2015-01-01 14:30:00	9.22691	139.866	9.25476	0.212592	100.745	1.28395	88.534	-88.534	3.49115	3.31146
2015-01-01 15:00:00	16.907	94.8888	16.9605	0.620601	100.681	1.28126	93.5784	-93.5784	4.59968	4.39873
2015-01-01 15:30:00	14.4386	117.707	14.5019	0.909754	100.661	1.27965	95.5501	-95.5501	4.07579	3.8816
2015-01-01 16:00:00	7.4622	44.5374	7.48348	0.95308	100.615	1.27886	93.7169	-93.7169	4.53426	4.40539
2015-01-01 16:30:00	8.45029	47.413	8.46492	1.04063	100.613	1.2784	93.0056	-93.0056	3.83719	3.6634
2015-01-01 17:00:00	4.11872	31.3391	4.12049	0.992663	100.573	1.27809	90.061	-90.061	3.53232	3.39936
2015-01-01 17:30:00	9.183	44.9215	9.17586	0.815875	100.567	1.27883	102.333	-102.333	3.74926	3.63898
2015-01-01 18:00:00	8.13312	8.62002	8.12951	0.722157	100.579	1.2794	101.389	-101.39	3.91194	3.82365
2015-01-01 18:30:00	10.7473	6.34002	10.7437	0.663814	100.549	1.27929	106.355	-106.355	4.58992	4.50653
2015-01-01 19:00:00	16.3351	14.9054	16.326	0.582923	100.542	1.27957	104.243	-104.243	3.7174	3.60013
2015-01-01 19:30:00	13.9474	-4.34722	13.9484	0.456821	100.539	1.28011	118.053	-118.053	4.27168	4.20521
2015-01-01 20:00:00	4.4763	-2.34882	4.47765	0.393122	100.549	1.28052	107.794	-107.794	1.75458	1.57509
2015-01-01 20:30:00	4.30693	2.80735	4.30379	0.304434	100.538	1.28079	118.288	-118.288	3.36559	3.31995
2015-01-01 21:00:00	2.10172	-0.906646	2.10225	0.217448	100.535	1.28115	127.234	-127.234	2.80614	2.73505
2015-01-01 21:30:00	0.642023	-1.68603	0.643813	0.215236	100.553	1.28137	141.362	-141.362	1.28641	0.971769
2015-01-01 22:00:00	1.34524	-6.1963	1.35251	0.11612	100.544	1.28172	137.862	-137.862	1.36936	1.28556
2015-01-01 22:30:00	-2.69713	0.422343	-2.69701	-0.707612	100.559	1.28572	262.797	97.2029	1.54571	1.40263
2015-01-01 23:00:00	-2.44088	-2.87588	-2.43685	-0.690361	100.588	1.28607	278.007	81.9929	2.69614	2.63333
2015-01-01 23:30:00	-0.765227	-0.767643	-0.764368	-0.46895	100.601	1.28522	291.636	68.3637	2.19856	2.18868
2015-01-02	0.902006	-6.55281	0.909218	-0.344362	100.613	1.28477	281.074	78.9265	1.01794	0.979198
2015-01-02 00:30:00	9.61861	-33.3405	9.66743	-0.87219	100.642	1.2876	285.595	74.4054	2.45762	2.43467
2015-01-02 01:00:00	-7.32935	22.5043	-7.35549	-2.08183	100.674	1.29378	296.125	63.8753	4.67886	4.62841
2015-01-02 01:30:00	1.23961	-40.0399	1.26951	-1.21998	100.697	1.29002	300.565	59.4346	4.66662	4.63033
2015-01-02 02:00:00	1.18188	-5.07488	1.18541	0.340821	100.713	1.28286	283.95	76.0499	4.22085	4.13144
2015-01-02 02:30:00	-1.85534	-7.30438	-1.84516	0.384077	100.761	1.28322	259.133	100.867	4.51387	4.46606
2015-01-02 03:00:00	-0.625874	-6.06826	-0.616251	0.444664	100.802	1.28344	243.429	116.571	5.17707	5.08893
2015-01-02 03:30:00	-0.835255	-16.3534	-0.804576	0.0350315	100.827	1.28565	246.994	113.006	5.53414	5.44298
2015-01-02 04:00:00	-1.48309	-0.292893	-1.482	0.239543	100.844	1.2849	247.885	112.115	5.949	5.86327
2015-01-02 04:30:00	1.44505	-14.0804	1.47287	-0.109492	100.868	1.28684	255.864	104.136	5.2633	5.17834
2015-01-02 05:00:00	2.58158	-20.9124	2.62005	-0.0409337	100.884	1.28673	257.207	102.793	5.89235	5.82965
2015-01-02 05:30:00	1.37317	-1.93387	1.37621	-0.400177	100.89	1.28852	261.018	98.9817	5.94	5.70527
2015-01-02 06:00:00	2.31958	-19.2545	2.36153	-2.67725	100.937	1.29993	296.222	63.7783	5.25603	5.19903
2015-01-02 06:30:00	4.02075	-31.575	4.09328	-2.53062	100.97	1.29963	285.569	74.4309	6.26259	6.21562
2015-01-02 07:00:00	0.527937	-15.1719	0.568589	-3.01208	101.01	1.30244	291.92	68.0805	5.41611	5.35036
2015-01-02 07:30:00	1.54337	-15.4139	1.58633	-2.97352	101.06	1.30289	303.043	56.9565	3.86136	3.82053
2015-01-02 08:00:00	0.615526	-5.49128	0.630907	-2.96094	101.096	1.30328	290.803	69.1975	4.76722	4.7307
2015-01-02 08:30:00	1.92101	-11.3043	1.95099	-2.85378	101.114	1.30301	286.075	73.9255	5.48112	5.45608
2015-01-02 09:00:00	3.50653	-24.6118	3.56124	-1.95713	101.132	1.29898	273.985	86.0148	6.36824	6.32658
2015-01-02 09:30:00	0.768243	-38.25	0.868215	-2.01544	101.148	1.29943	268.875	91.1252	5.71222	5.66383
2015-01-02 10:00:00	11.4672	-18.666	11.5162	-1.83406	101.147	1.29852	270.043	89.9575	4.88343	4.80093
2015-01-02 10:30:00	10.7885	0.929204	10.7797	-1.59798	101.127	1.29712	278.191	81.8088	6.06796	5.97611
2015-01-02 11:00:00	25.1283	-12.0882	25.1512	-1.05737	101.109	1.29432	275.925	84.0747	4.8878	4.78391
2015-01-02 11:30:00	35.8196	-34.4924	35.9004	-0.0745934	101.083	1.28935	270.037	89.9626	1.79654	1.60128
2015-01-02 12:00:00	5.26597	59.8973	5.10499	0.637022	101.052	1.28562	319.634	40.3657	1.08654	0.827042
2015-01-02 12:30:00	20.1095	95.2623	19.8377	1.09518	101.004	1.28285	334.211	25.7887	1.53352	1.3937
2015-01-02 13:00:00	14.7696	63.8845	14.592	1.6558	100.95	1.27956	318.985	41.0146	1.34818	1.06417
2015-01-02 13:30:00	1.90869	95.7097	1.66391	2.07456	100.871	1.27662	317.542	42.4581	1.17301	0.985645
2015-01-02 14:00:00	34.1022	67.6583	33.9498	2.68945	100.793	1.27283	19.9473	-19.9473	0.745893	0.118104
2015-01-02 14:30:00	-33.2896	69.3538	-33.4155	2.8664	100.766	1.27168	64.9177	-64.9177	2.25617	2.00124
2015-01-02 15:00:00	0.0811653	80.6279	-0.0610344	3.18494	100.752	1.27006	85.6465	-85.6465	2.59159	2.45312
2015-01-02 15:30:00	18.434	111.574	18.2012	3.2038	100.742	1.26982	92.2866	-92.2866	3.83249	3.63062
2015-01-02 16:00:00	6.71695	74.7595	6.55292	2.91546	100.732	1.27101	97.5796	-97.5796	4.16676	4.01539
2015-01-02 16:30:00	11.0459	79.8852	10.8276	2.62681	100.727	1.27223	90.7243	-90.7243	4.24909	4.06622
2015-01-02 17:00:00	-0.325086	34.9084	-0.433441	2.1946	100.72	1.2741	99.1882	-99.1882	4.94656	4.80503
2015-01-02 17:30:00	8.15723	33.956	8.05242	1.78607	100.705	1.27582	101.927	-101.927	5.15929	5.02282
2015-01-02 18:00:00	8.90766	13.4129	8.86274	1.58508	100.679	1.27642	99.6938	-99.6938	5.90176	5.79571
2015-01-02 18:30:00	16.3237	19.4159	16.2561	1.41732	100.662	1.27698	98.2583	-98.2583	5.53222	5.40865
2015-01-02 19:00:00	7.34819	5.08272	7.32721	1.31014	100.652	1.27733	96.6072	-96.6072	5.80967	5.70801
2015-01-02 19:30:00	10.0819	3.15671	10.0671	1.23453	100.646	1.27764	97.9509	-97.9509	5.06123	4.91062
2015-01-02 20:00:00	14.3543	8.63368	14.3194	1.19396	100.628	1.27759	99.9695	-99.9695	4.89764	4.77487
2015-01-02 20:30:00	24.6672	-11.1937	24.6896	1.01409	100.62	1.27829	99.8568	-99.8568	5.42643	5.28425
2015-01-02 21:00:00	13.4555	-3.86942	13.4608	0.87548	100.606	1.27873	99.9943	-99.9943	4.36118	4.21465
2015-01-02 21:30:00	9.50893	-4.27982	9.52018	0.725603	100.571	1.27892	100.641	-100.641	3.86481	3.7604
2015-01-02 22:00:00	21.1135	-11.2182	21.1472	0.647123	100.531	1.27877	98.0511	-98.0511	3.97648	3.87655
2015-01-02 22:30:00	11.8366	-11.253	11.8732	0.594514	100.509	1.27878	98.2781	-98.2781	3.21741	3.08404
2015-01-02 23:00:00	5.28648	-7.2068	5.31008	0.422972	100.458	1.27896	92.3776	-92.3776	3.29911	3.20924
2015-01-02 23:30:00	9.81279	-9.14888	9.84162	0.315738	100.429	1.27908	106.977	-106.977	2.82434	2.73718
2015-01-03	6.34094	-3.44869	6.35008	-0.028657	100.413	1.28048	119.215	-119.215	2.67371	2.59472
2015-01-03 00:30:00	0.702189	3.4186	0.685948	-0.859042	100.356	1.28361	146.983	-146.983	2.12621	2.03746
2015-01-03 01:00:00	0.0916392	-1.75753	0.100156	-1.16316	100.317	1.28451	163.815	-163.815	1.23359	1.20829
2015-01-03 01:30:00	-0.575693	-1.55012	-0.567634	-1.38595	100.282	1.28512	174.632	-174.632	0.80825	0.792225
2015-01-03 02:00:00	-0.467179	-0.661852	-0.463524	-1.73594	100.245	1.28631	179.234	-179.234	0.612442	0.583815
2015-01-03 02:30:00	1.94308	-5.80799	1.96721	-1.87009	100.214	1.28659	169.03	-169.03	0.866837	0.83949
2015-01-03 03:00:00	-0.719919	0.767289	-0.722966	-2.22392	100.183	1.28783	191.924	168.076	0.396174	0.356218
2015-01-03 03:30:00	3.4453	-6.84538	3.47679	-2.43159	100.138	1.28821	190.107	169.893	0.3552	0.331799
2015-01-03 04:00:00	0.510087	1.26957	0.502684	-3.05204	100.105	1.29073	197.55	162.45	0.779934	0.725591
2015-01-03 04:30:00	0.0640559	-3.12658	0.0811244	-3.3387	100.069	1.29163	192.973	167.027	0.694887	0.666223
2015-01-03 05:00:00	2.00822	-7.80868	2.04713	-3.57247	100.041	1.2924	227.411	132.589	0.937309	0.827996
2015-01-03 05:30:00	0.613899	-1.63074	0.622001	-3.90506	99.9625	1.29298	251.002	108.998	1.66507	1.63441
2015-01-03 06:00:00	-0.972883	2.83618	-0.986918	-4.02321	99.9348	1.29319	242.915	117.085	1.70904	1.64266
2015-01-03 06:30:00	0.00688597	-2.6263	0.0208363	-4.07696	99.9067	1.29308	252.774	107.226	2.2512	2.20799
2015-01-03 07:00:00	2.16706	4.79108	2.14015	-4.00515	99.8912	1.29255	245.897	114.103	1.77637	1.72091
2015-01-03 07:30:00	-0.402415	3.71779	-0.421325	-3.78495	99.8461	1.29091	247.109	112.891	1.4871	1.42824
2015-01-03 08:00:00	-0.167983	2.93625	-0.183262	-3.735	99.815	1.29026	227.263	132.737	1.24617	1.15521
2015-01-03 08:30:00	1.72627	2.47268	1.71168	-3.73159	99.8102	1.29018	240.093	119.907	1.9765	1.87446
2015-01-03 09:00:00	3.19256	-6.32829	3.22178	-3.63797	99.805	1.28968	250.671	109.329	3.05936	3.00298
2015-01-03 09:30:00	0.0344386	0.799989	0.0304096	-3.63476	99.821	1.28988	254.441	105.559	3.90713	3.8701
2015-01-03 10:00:00	7.14757	4.45417	7.12071	-3.17711	99.7925	1.28735	257.479	102.521	2.74684	2.69976
2015-01-03 10:30:00	5.02566	2.42736	5.01166	-2.76607	99.7618	1.28504	248.334	111.666	2.27555	2.21633
2015-01-03 11:00:00	0.827355	25.7198	0.727308	-2.31179	99.7113	1.28227	243.632	116.368	1.47732	1.37801
2015-01-03 11:30:00	-4.14184	18.1362	-4.213	-1.89513	99.6463	1.27944	252.088	107.912	1.73462	1.66864
2015-01-03 12:00:00	1.42548	44.1443	1.22011	-1.34015	99.5903	1.27607	298.466	61.5336	1.32954	1.15247
2015-01-03 12:30:00	-0.0495289	64.2977	-0.336585	-0.499279	99.5048	1.27105	311.834	48.1665	0.891285	0.617416
2015-01-03 13:00:00	4.27353	87.3803	3.89985	0.156435	99.4377	1.26717	328.238	31.7617	0.590773	0.288996
2015-01-03 13:30:00	2.91405	13.0881	2.85633	0.751582	99.3715	1.26357	325.16	34.8401	0.467856	0.158262
2015-01-03 14:00:00	-1.35469	147.914	-1.96083	1.63665	99.3192	1.25885	281.083	78.9166	0.496363	0.20385
2015-01-03 14:30:00	1.75936	63.0998	1.49657	1.95214	99.281	1.25692	316.956	43.0436	0.80825	0.587789
2015-01-03 15:00:00	3.62218	29.2911	3.49478	2.48126	99.277	1.25444	331.067	28.9334	0.72144	0.446405
2015-01-03 15:30:00	5.3727	24.8252	5.26016	2.81276	99.2927	1.25312	341.265	18.735	0.745988	0.476484
2015-01-03 16:00:00	2.03382	30.2825	1.89672	2.95863	99.3011	1.25256	349.313	10.6873	1.16465	0.49738
2015-01-03 16:30:00	3.56505	12.369	3.50759	3.27913	99.3154	1.25129	100.728	-100.728	1.36998	1.18688
2015-01-03 17:00:00	0.6293	3.19464	0.614224	3.43885	99.3413	1.25088	95.7333	-95.7333	1.10448	1.05944
2015-01-03 17:30:00	1.8218	2.3541	1.80937	3.45315	99.3541	1.25097	77.3115	-77.3115	0.755795	0.509855
2015-01-03 18:00:00	8.81954	-4.02037	8.83194	3.30328	99.3749	1.25186	86.6875	-86.6875	1.04465	0.975072
2015-01-03 18:30:00	1.11391	-2.75981	1.12912	2.9215	99.4046	1.2539	208.298	151.702	0.405525	0.338714
2015-01-03 19:00:00	-0.193781	-1.36076	-0.185883	2.64104	99.4304	1.25553	249.402	110.598	0.7658	0.656164
2015-01-03 19:30:00	1.60102	-4.77167	1.62744	2.383	99.453	1.25697	313.578	46.4224	1.09346	1.05162
2015-01-03 20:00:00	-1.40019	1.02787	-1.40475	1.99477	99.4656	1.2589	301.273	58.7272	1.33481	1.26312
2015-01-03 20:30:00	-1.09275	-3.1759	-1.07093	2.09559	99.4885	1.25868	32.4211	-32.4211	0.883212	0.601139
2015-01-03 21:00:00	-1.46147	-1.65999	-1.44896	2.19134	99.5037	1.25843	141.271	-141.271	0.982943	0.934778
2015-01-03 21:30:00	2.66211	0.756599	2.65417	2.07035	99.5004	1.25896	145.81	-145.81	1.41656	1.40043
2015-01-03 22:00:00	0.222549	-1.46712	0.231581	1.90416	99.4819	1.25949	139.37	-139.37	1.37707	1.35552
2015-01-03 22:30:00	2.90797	-0.662134	2.9088	1.85696	99.4928	1.25984	135.856	-135.856	1.72355	1.69192
2015-01-03 23:00:00	7.38867	-3.27353	7.39972	1.7876	99.4908	1.26019	129.978	-129.978	2.33601	2.3119
2015-01-03 23:30:00	-9.6037	24.6861	-9.76216	1.30048	99.4826	1.26222	149.947	-149.947	0.739481	0.623798
2015-01-04	0.25131	-4.61328	0.286021	0.418559	99.4846	1.26625	241.622	118.378	0.976288	0.881188
2015-01-04 00:30:00	-3.08947	13.6305	-3.16621	-0.169326	99.4745	1.269	249.011	110.989	2.78527	2.73617
2015-01-04 01:00:00	-0.527329	-2.7404	-0.511203	0.134801	99.4802	1.26768	252.177	107.823	3.3422	3.32194
2015-01-04 01:30:00	0.150673	0.0278935	0.150368	0.215069	99.4945	1.26751	253.516	106.484	2.59829	2.57842
2015-01-04 02:00:00	-2.07804	2.26486	-2.08851	-0.110719	99.495	1.26902	263.063	96.9374	1.38871	1.3312
2015-01-04 02:30:00	-0.216075	-2.24125	-0.202097	-0.393088	99.5287	1.27072	254.598	105.402	0.932639	0.872189
2015-01-04 03:00:00	8.22773	-8.46685	8.26992	-0.845709	99.5767	1.27345	274.583	85.417	2.64133	2.60172
2015-01-04 03:30:00	-0.762043	-1.76623	-0.751805	-0.469425	99.5824	1.27182	263.252	96.7481	1.99549	1.96668
2015-01-04 04:00:00	-1.65419	1.06909	-1.65821	-0.224457	99.5801	1.27066	266.269	93.7315	2.03949	2.01695
2015-01-04 04:30:00	-0.98257	2.16333	-0.991348	0.59586	99.5679	1.26677	264.087	95.9127	2.86214	2.83514
2015-01-04 05:00:00	1.37761	-2.67765	1.3903	-0.0387198	99.5302	1.26917	270.853	89.1467	3.12985	3.11211
2015-01-04 05:30:00	-13.7641	140.637	-14.3148	2.49362	99.4896	1.25712	266.701	93.299	3.08779	3.01389
2015-01-04 06:00:00	-20.3105	200.879	-21.1202	2.15221	99.4428	1.25809	260.572	99.4282	4.23734	4.20893
2015-01-04 06:30:00	0.164444	18.325	0.0598571	-0.687413	99.4723	1.27141	260.894	99.1064	2.13284	2.09768
2015-01-04 07:00:00	-0.731941	6.40071	-0.769616	-0.958671	99.5218	1.27328	267.31	92.6895	3.95411	3.94396
2015-01-04 07:30:00	2.71913	-21.5641	2.8336	-0.733271	99.5437	1.27256	268.098	91.9022	4.85515	4.8196
2015-01-04 08:00:00	13.0109	-69.4607	13.3246	-0.452984	99.5784	1.27176	273.199	86.8013	6.23636	6.1914
2015-01-04 08:30:00	-1.81782	-13.2659	-1.75015	-0.724599	99.6157	1.27347	270.534	89.4659	3.29547	3.22929
2015-01-04 09:00:00	6.91934	-25.7022	7.05146	-0.414661	99.6634	1.2726	253.954	106.046	1.23739	1.09652
2015-01-04 09:30:00	2.63719	-13.3915	2.70162	0.424326	99.7121	1.26935	264.688	95.3121	1.01295	0.826669
2015-01-04 10:00:00	5.47585	-9.48039	5.51419	1.05764	99.7311	1.2667	250.671	109.329	0.751478	0.460306
2015-01-04 10:30:00	0.539801	20.6211	0.444637	1.74306	99.7477	1.26375	289	71.0001	0.896323	0.783726
2015-01-04 11:00:00	10.8251	35.728	10.6346	2.61439	99.7334	1.25953	275.683	84.3171	1.52918	1.45447
2015-01-04 11:30:00	5.49618e+19	5.02679e+18	-1.10856e+23	3.13269	99.7164	4.18932e+17	264.632	95.3678	2.50019	2.4344
2015-01-04 12:00:00	6.88862	39.4791	6.90662	3.86513	99.6837	1.2537	270.819	89.1814	1.35148	1.23624
2015-01-04 12:30:00	8.407	49.9929	8.43021	4.72929	99.6142	1.24893	282.321	77.6786	2.13718	2.06654
2015-01-04 13:00:00	9.04403	-20.6613	9.03644	5.57585	99.5517	1.24435	284.656	75.3443	1.54611	1.3297
2015-01-04 13:30:00	6.82618	41.1116	6.84994	6.28811	99.5021	1.24057	270.549	89.4513	2.42479	2.32897
2015-01-04 14:00:00	7.42111	32.6639	7.42931	6.80303	99.4885	1.23809	271.059	88.9412	2.28507	2.23377
2015-01-04 14:30:00	5.18361	59.195	5.1731	7.4312	99.4832	1.23522	294.673	65.3273	2.04205	1.90452
2015-01-04 15:00:00	0.601064	37.6679	0.58309	7.53854	99.474	1.2346	301.528	58.4722	1.91232	1.83302
2015-01-04 15:30:00	-3.33116	46.7494	-3.35432	7.63647	99.4919	1.23439	302.862	57.1384	1.94533	1.87107
2015-01-04 16:00:00	3.40098	3.13342	3.39892	7.49491	99.4927	1.23502	315.072	44.9279	2.48904	2.45707
2015-01-04 16:30:00	-0.0390925	1.63582	-0.0404955	7.18052	99.5006	1.23648	322.057	37.9434	2.7047	2.67367
2015-01-04 17:00:00	0.0995318	-0.548848	0.100043	6.99972	99.5218	1.23753	328.323	31.677	2.56743	2.53263
2015-01-04 17:30:00	6.09042	-11.3509	6.10164	6.67992	99.5442	1.23921	337.117	22.8831	2.76283	2.71693
2015-01-04 18:00:00	10.1094	-2.99815	10.1111	6.31536	99.5658	1.24107	358.673	1.32683	2.68444	2.62271
2015-01-04 18:30:00	-5.44232	10.8233	-5.465	5.97476	99.5862	1.24276	11.7122	-11.7122	3.20934	3.15352
2015-01-04 19:00:00	3.89438	-7.81661	3.91668	5.7648	99.576	1.2435	2.3471	-2.34711	2.89421	2.78455
2015-01-04 19:30:00	1.41879	2.76864	1.40829	5.68404	99.6192	1.24437	30.0887	-30.0888	1.86108	1.71445
2015-01-04 20:00:00	-2.51383	4.99869	-2.53024	5.64524	99.6679	1.24514	45.9252	-45.9252	2.09722	1.97866
2015-01-04 20:30:00	-1.6133	-2.14446	-1.60167	5.47263	99.6745	1.24589	22.8656	-22.8656	2.5157	2.4532
2015-01-04 21:00:00	-1.35189	16.4194	-1.43762	5.2258	99.6962	1.24722	355.209	4.79066	1.90118	1.83534
2015-01-04 21:30:00	4.45146	-0.397581	4.44898	4.63529	99.6952	1.24981	333.708	26.2916	2.87526	2.83286
2015-01-04 22:00:00	-3.67982	-7.1976	-3.62357	4.1763	99.6958	1.25178	329.686	30.3142	3.33481	3.30448
2015-01-04 22:30:00	-4.61338	-4.18369	-4.56734	3.8987	99.6711	1.25255	339.618	20.3824	3.27856	3.23836
2015-01-04 23:00:00	2.972	-2.55386	2.99215	3.65774	99.6936	1.25385	324.755	35.2452	3.33887	3.29864
2015-01-04 23:30:00	12.08	0.446312	12.0537	3.43482	99.69	1.25483	321.878	38.1216	2.93546	2.77601
2015-01-05	-2.40827	-0.236219	-2.40261	3.31565	99.6647	1.25518	276.857	83.1433	3.07752	2.97173
2015-01-05 00:30:00	-2.74413	-2.64061	-2.71847	3.13824	99.6388	1.25568	299.45	60.5503	3.05508	3.02363
2015-01-05 01:00:00	-0.934492	-2.03275	-0.916797	3.08589	99.6201	1.25569	307.04	52.9603	1.86726	1.7471
2015-01-05 01:30:00	2.86022	4.40952	2.81904	3.22481	99.6586	1.25552	146.621	-146.621	0.867221	0.451755
2015-01-05 02:00:00	0.618476	12.8446	0.504807	3.30645	99.653	1.25504	66.2192	-66.2192	0.934848	0.623297
2015-01-05 02:30:00	-1.09039	0.332423	-1.09159	3.13292	99.6117	1.25529	304.248	55.7523	0.930511	0.683974
2015-01-05 03:00:00	-1.56316	0.0590582	-1.56113	3.11317	99.6188	1.25547	260.169	99.8306	0.746509	0.624664
2015-01-05 03:30:00	-2.42982	-1.63268	-2.41183	3.01134	99.5677	1.25531	254.336	105.664	1.16325	1.09576
2015-01-05 04:00:00	5.83776	0.971163	5.81807	3.11917	99.5062	1.25396	355.03	4.96992	0.981381	0.849007
2015-01-05 04:30:00	-2.35389	1.41372	-2.36318	3.10793	99.497	1.25392	256.297	103.703	1.23392	0.851136
2015-01-05 05:00:00	-2.43955	0.727005	-2.44187	2.868	99.5058	1.25522	229.721	130.279	1.44752	1.34455
2015-01-05 05:30:00	-5.40412	-6.16113	-5.34544	2.8474	99.5011	1.25526	237.417	122.583	0.812368	0.713747
2015-01-05 06:00:00	-1.7472	5.52997	-1.79205	3.07145	99.4966	1.25415	85.3884	-85.3884	0.732745	0.0826766
2015-01-05 06:30:00	4.62447	-1.44363	4.62981	3.15348	99.5155	1.25399	180.774	179.226	0.719701	0.692694
2015-01-05 07:00:00	-3.05045	0.78693	-3.05259	3.21969	99.4793	1.25319	223.517	136.483	0.380532	0.307707
2015-01-05 07:30:00	0.252241	1.0285	0.242219	3.28794	99.5063	1.25323	217.337	142.663	0.635097	0.543219
2015-01-05 08:00:00	-3.68493	3.22968	-3.71005	3.33513	99.5447	1.25345	219.248	140.752	0.983782	0.877874
2015-01-05 08:30:00	1.7123	1.25232	1.69744	3.37737	99.531	1.25312	265.458	94.5422	1.99504	1.9283
2015-01-05 09:00:00	1.92204	-4.71865	1.96274	3.34523	99.5859	1.25397	243.751	116.249	1.20265	1.11176
2015-01-05 09:30:00	4.82376	1.3552	4.80382	3.49645	99.6013	1.25351	245.702	114.298	1.47099	1.42274
2015-01-05 10:00:00	2.33629	4.80932	2.29201	3.74006	99.6265	1.25277	247.849	112.151	0.643261	0.414951
2015-01-05 10:30:00	28.6576	-33.2691	28.8256	5.08467	99.6494	1.24722	219.145	140.855	3.08365	2.94094
2015-01-05 11:00:00	31.0275	-44.8322	31.1931	6.46134	99.6397	1.2411	221.014	138.986	4.3512	4.19397
2015-01-05 11:30:00	26.1856	-14.4797	26.1996	8.48459	99.6452	1.23249	219.07	140.93	4.93271	4.75372
2015-01-05 12:00:00	6.1535	26.0045	6.13748	9.06253	99.6287	1.22984	221.984	138.016	5.79371	5.57902
2015-01-05 12:30:00	9.40696	44.7593	9.39194	9.03805	99.6361	1.23006	215.108	144.892	4.56729	4.35771
2015-01-05 13:00:00	4.92878	31.6157	4.91945	8.78315	99.6384	1.2312	205.56	154.44	5.04682	4.72757
2015-01-05 13:30:00	-7.41662	81.4835	-7.51338	8.37975	99.6515	1.23305	210.01	149.99	5.01311	4.71478
2015-01-05 14:00:00	6.39974	64.8764	6.3279	8.08653	99.7246	1.23525	210.908	149.092	4.25076	3.93887
2015-01-05 14:30:00	2.5374	52.4963	2.48095	7.7644	99.7839	1.23741	209.339	150.661	4.73518	4.46386
2015-01-05 15:00:00	11.7437	63.8084	11.6892	7.65546	99.8288	1.23846	221.081	138.919	5.84534	5.56466
2015-01-05 15:30:00	14.6895	50.8472	14.7495	7.16198	99.8937	1.24163	227.821	132.179	8.14747	7.79253
2015-01-05 16:00:00	8.61481	71.4443	8.70244	6.56918	99.9736	1.24527	227.578	132.422	9.38016	9.12096
2015-01-05 16:30:00	10.6999	41.8803	10.7599	6.07562	100.04	1.2483	228.482	131.518	7.55949	7.2059
2015-01-05 17:00:00	16.7953	-15.9729	16.7832	5.33248	100.112	1.25253	227.869	132.131	8.90689	8.62677
2015-01-05 17:30:00	-2.88648	17.5805	-2.88221	4.57714	100.211	1.25712	227.535	132.465	8.96641	8.69863
2015-01-05 18:00:00	27.9212	19.5925	27.9502	4.02572	100.277	1.26051	233.039	126.961	9.28985	8.996
2015-01-05 18:30:00	8.54856	-9.14512	8.53095	3.53838	100.322	1.26344	231.895	128.105	9.22302	8.9275
2015-01-05 19:00:00	2.34224	3.81467	2.35155	2.85634	100.422	1.26777	230.974	129.026	7.85516	7.50024
2015-01-05 19:30:00	4.89874	33.2632	4.96592	2.12411	100.478	1.27185	233.317	126.683	8.3969	8.06142
2015-01-05 20:00:00	7.62258	2.25569	7.63097	1.36892	100.574	1.27657	234.238	125.762	7.7444	7.4297
2015-01-05 20:30:00	3.7731	-10.0982	3.746	0.889927	100.628	1.27954	235.958	124.042	8.28225	7.98124
2015-01-05 21:00:00	2.29374	1.28557	2.2993	0.547693	100.65	1.28145	237.396	122.604	8.51675	8.25248
2015-01-05 21:30:00	0.997514	6.37426	1.0192	0.168926	100.681	1.28362	237.683	122.317	8.35193	8.12776
2015-01-05 22:00:00	5.59096	-4.69308	5.57978	-0.14165	100.705	1.28537	234.856	125.144	7.4329	7.18796
2015-01-05 22:30:00	10.8765	-4.81314	10.8674	-0.442875	100.736	1.28718	233.131	126.868	6.44199	6.25471
2015-01-05 23:00:00	-8.80631	-3.32727	-8.81612	-0.623336	100.782	1.28852	226.222	133.778	6.17471	5.98811
2015-01-05 23:30:00	0.245422	-1.06919	0.243044	-0.851314	100.818	1.29009	221.639	138.361	5.6441	5.46512
2015-01-06	4.68518	7.89966	4.70643	-1.15541	100.821	1.29157	218.591	141.409	5.27712	5.05973
2015-01-06 00:30:00	-0.638771	-6.14581	-0.653725	-1.42285	100.857	1.29331	216.566	143.434	4.3803	4.17704
2015-01-06 01:00:00	6.17192	-2.41255	6.16824	-1.64665	100.88	1.2947	222.29	137.71	4.98006	4.80626
2015-01-06 01:30:00	6.28983	-2.81789	6.28458	-1.83884	100.886	1.29573	222.162	137.838	5.7406	5.54408
2015-01-06 02:00:00	3.78507	-4.7456	3.77265	-1.97165	100.902	1.29656	220.234	139.766	5.00758	4.83474
2015-01-06 02:30:00	2.79495	-9.2385	2.77077	-2.02709	100.929	1.29715	221.296	138.704	5.1861	5.00334
2015-01-06 03:00:00	2.72092	-10.5549	2.69329	-2.10911	100.928	1.29753	227.562	132.438	5.06102	4.88596
2015-01-06 03:30:00	-2.24573	-17.5074	-2.28945	-2.35718	100.91	1.29846	234.308	125.692	5.22942	5.08215
2015-01-06 04:00:00	-1.56142	-19.1067	-1.59928	-2.45834	100.891	1.29866	234.22	125.78	5.2064	5.05172
2015-01-06 04:30:00	-3.94747	-21.0184	-3.98651	-2.68459	100.876	1.29954	240.987	119.013	5.53213	5.4082
2015-01-06 05:00:00	-0.735523	-12.4946	-0.75346	-2.69671	100.87	1.29949	241.377	118.623	5.26786	5.16866
2015-01-06 05:30:00	-1.40304	-20.8197	-1.43199	-2.61701	100.886	1.2993	230.867	129.133	3.17614	3.04444
2015-01-06 06:00:00	1.08892	-15.4489	1.0713	-2.30417	100.871	1.29759	230.676	129.324	3.26992	3.15163
2015-01-06 06:30:00	1.62213	-17.1794	1.60354	-2.20217	100.858	1.29693	238.879	121.121	3.53607	3.39674
2015-01-06 07:00:00	1.66119	-9.44429	1.65173	-2.45217	100.857	1.2981	253.26	106.74	3.8371	3.76818
2015-01-06 07:30:00	2.66812	-4.27193	2.66557	-2.42345	100.883	1.29826	261.683	98.3175	3.4355	3.38849
2015-01-06 08:00:00	3.91997	-6.30087	3.9154	-2.28626	100.891	1.29772	269.026	90.9735	2.44812	2.28143
2015-01-06 08:30:00	1.14005	-0.644301	1.13957	-2.14803	100.896	1.29715	270.86	89.1403	3.00071	2.90686
2015-01-06 09:00:00	1.29087	3.0321	1.29509	-1.84543	100.873	1.29543	240.461	119.539	4.09865	3.95459
2015-01-06 09:30:00	3.58316	35.1293	3.61831	-1.6873	100.861	1.2945	227.11	132.89	3.0419	2.8819
2015-01-06 10:00:00	2.15402	24.829	2.18413	-1.36471	100.844	1.29276	228.257	131.743	3.69464	3.54194
2015-01-06 10:30:00	5.48619	57.8456	5.55555	-0.527002	100.81	1.28835	235.661	124.339	2.14962	1.34321
2015-01-06 11:00:00	5.59214	67.3852	5.69465	0.223382	100.775	1.28439	213.844	146.156	1.95771	1.68851
2015-01-06 11:30:00	4.35547	57.752	4.43307	0.685443	100.715	1.28146	197.06	162.94	2.67342	2.52258
2015-01-06 12:00:00	37.4285	33.1077	37.4995	1.40633	100.663	1.27746	217.969	142.031	2.38262	2.18731
2015-01-06 12:30:00	18.4003	68.2162	18.538	2.17038	100.606	1.27321	197.114	162.886	2.0349	1.81671
2015-01-06 13:00:00	-13.9027	70.2475	-13.7954	1.7795	100.555	1.27435	144.796	-144.796	3.98727	3.76283
2015-01-06 13:30:00	-27.2086	117.134	-27.0248	1.79788	100.503	1.27361	104.189	-104.189	3.46211	3.27542
2015-01-06 14:00:00	6.80778	81.7473	6.9734	1.98964	100.46	1.2722	116.988	-116.988	3.64656	3.43371
2015-01-06 14:30:00	17.5556	148.526	17.9028	2.14572	100.423	1.27104	103.961	-103.961	3.85416	3.59335
2015-01-06 15:00:00	5.15141	84.4654	5.37619	2.2715	100.413	1.27037	104.647	-104.647	4.20017	4.03345
2015-01-06 15:30:00	10.1881	92.4587	10.4315	2.48502	100.41	1.26934	112.425	-112.425	3.76566	3.54765
2015-01-06 16:00:00	5.03422	37.8543	5.12849	2.73535	100.414	1.26823	100.201	-100.201	3.33338	3.15345
2015-01-06 16:30:00	8.77558	73.1803	8.95564	2.8215	100.421	1.26792	106.111	-106.112	4.09953	3.94208
2015-01-06 17:00:00	11.2803	46.6527	11.395	2.66989	100.438	1.26883	97.0047	-97.0047	4.50576	4.37196
2015-01-06 17:30:00	19.2597	21.65	19.3109	2.47786	100.454	1.26987	103.287	-103.287	4.56932	4.47227
2015-01-06 18:00:00	11.9169	15.375	11.9494	2.38559	100.472	1.27052	103.783	-103.783	4.01292	3.90438
2015-01-06 18:30:00	17.7764	10.5339	17.7874	2.3562	100.489	1.27078	103.513	-103.513	3.91181	3.78858
2015-01-06 19:00:00	4.8505	7.16475	4.86086	2.33588	100.499	1.27104	110.1	-110.1	4.42587	4.34108
2015-01-06 19:30:00	14.8792	7.0082	14.8936	2.21354	100.508	1.27174	102.686	-102.686	4.58627	4.48334
2015-01-06 20:00:00	16.4117	-1.49466	16.4135	1.72691	100.507	1.27394	99.0986	-99.0986	4.91507	4.8226
2015-01-06 20:30:00	2.1949	12.829	2.2075	1.32096	100.536	1.27617	102.224	-102.224	3.90654	3.79957
2015-01-06 21:00:00	2.83843	-1.01385	2.83815	1.2175	100.539	1.27666	109.117	-109.117	3.01119	2.95116
2015-01-06 21:30:00	4.58654	-0.501839	4.58679	1.23999	100.55	1.27672	114.602	-114.602	2.98676	2.94484
2015-01-06 22:00:00	4.84365	6.52791	4.84659	1.18478	100.557	1.27703	106.803	-106.803	2.54646	2.50244
2015-01-06 22:30:00	7.57635	-7.63769	7.57596	0.90943	100.549	1.27818	116.19	-116.19	2.95921	2.89795
2015-01-06 23:00:00	5.21235	0.745723	5.21253	0.809768	100.574	1.27897	123.546	-123.546	2.23524	2.04246
2015-01-06 23:30:00	4.6734	-14.9139	4.67064	0.851412	100.602	1.27915	151.185	-151.185	1.53828	0.27613
2015-01-07	-11.3053	12.7434	-11.3114	0.521553	100.614	1.28076	269.778	90.2223	2.09097	2.07126
2015-01-07 00:30:00	-14.8705	7.02057	-14.8758	0.113505	100.599	1.28243	272.979	87.0214	2.71584	2.69435
2015-01-07 01:00:00	-0.101208	-0.998696	-0.101287	0.274143	100.607	1.28189	276.406	83.5939	2.81755	2.78986
2015-01-07 01:30:00	-1.09757	3.88927	-1.09844	0.157986	100.61	1.28245	260.954	99.0462	1.88866	1.87093
2015-01-07 02:00:00	-5.19245	-4.20441	-5.19313	-0.292712	100.625	1.28479	270.268	89.7322	3.02408	3.00519
2015-01-07 02:30:00	1.97734	-9.79202	1.97307	-0.625972	100.641	1.28659	274.832	85.1683	4.2509	4.21137
2015-01-07 03:00:00	2.28098	-11.7973	2.28169	-0.706286	100.651	1.28706	268.558	91.4425	3.77666	3.73627
2015-01-07 03:30:00	5.56465	-39.7455	5.5643	-0.650111	100.65	1.28679	269.484	90.5157	4.93156	4.88312
2015-01-07 04:00:00	4.00598	-29.6159	4.01375	-0.858294	100.649	1.28773	271.585	88.4146	5.2771	5.20866
2015-01-07 04:30:00	6.76621	-33.8798	6.76979	-1.20059	100.642	1.28928	276.584	83.4155	6.02209	5.95966
2015-01-07 05:00:00	6.45246	-33.3576	6.45207	-1.32945	100.639	1.28986	277.593	82.407	5.42818	5.35701
2015-01-07 05:30:00	6.10593	-34.3896	6.10062	-1.33916	100.668	1.29028	274.798	85.2023	5.4258	5.37095
2015-01-07 06:00:00	2.68423	-14.7246	2.68165	-1.58346	100.707	1.29196	274.071	85.9287	5.78583	5.75655
2015-01-07 06:30:00	11.5627	-66.3882	11.5585	-1.57334	100.726	1.29214	281.918	78.0822	5.82169	5.7657
2015-01-07 07:00:00	9.57241	-39.9341	9.57108	-1.68617	100.753	1.29302	283.606	76.3945	5.11099	5.04922
2015-01-07 07:30:00	4.39752	-17.3818	4.39668	-1.7616	100.791	1.29387	284.792	75.2081	4.35395	4.28656
2015-01-07 08:00:00	5.6316	-19.3344	5.63255	-1.76297	100.838	1.29446	281.844	78.1555	3.11494	3.06912
2015-01-07 08:30:00	5.47973	-6.63068	5.48044	-1.74024	100.887	1.29499	284.697	75.3033	2.23349	2.1612
2015-01-07 09:00:00	5.70278	1.05117	5.70269	-1.621	100.935	1.29503	280.101	79.8987	2.09562	2.04783
2015-01-07 09:30:00	-1.79533	19.2229	-1.79172	-1.52943	100.967	1.29503	273.056	86.9437	2.16826	2.12592
2015-01-07 10:00:00	0.0364206	40.3878	0.0422629	-1.21326	100.992	1.29384	261.928	98.0716	0.924941	0.821149
2015-01-07 10:30:00	2.71359	59.127	2.72431	-0.804721	101.001	1.29202	274.902	85.0975	1.02248	0.90949
2015-01-07 11:00:00	4.53123	26.7891	4.53127	-0.270989	101.014	1.28965	299.377	60.6225	1.55666	1.43221
2015-01-07 11:30:00	13.657	98.5275	13.6743	0.227645	100.992	1.28703	314.279	45.7211	1.97014	1.71286
2015-01-07 12:00:00	2.60285	79.9228	2.72351	0.524242	100.962	1.28536	350.98	9.02016	2.66582	2.49434
2015-01-07 12:30:00	21.4566	153.155	21.6562	0.91289	100.932	1.28314	334.37	25.6305	1.72071	1.53673
2015-01-07 13:00:00	5.20596	145.863	5.39203	1.11369	100.903	1.28184	345.376	14.6243	1.45793	1.01212
2015-01-07 13:30:00	2.75081	99.4096	2.86995	1.32382	100.881	1.28056	341.712	18.2883	1.68308	1.39616
2015-01-07 14:00:00	10.0332	120.831	10.167	1.61752	100.869	1.27904	354.761	5.23925	1.61159	1.21132
2015-01-07 14:30:00	5.64387	62.4929	5.70431	1.80225	100.888	1.2784	32.5941	-32.5941	1.97107	1.66362
2015-01-07 15:00:00	5.55307	81.1377	5.62412	2.01173	100.899	1.27757	26.9384	-26.9384	1.28234	0.864014
2015-01-07 15:30:00	4.73685	32.7494	4.76245	2.11499	100.901	1.2771	10.673	-10.673	1.55262	1.21854
2015-01-07 16:00:00	5.31762	39.077	5.34518	2.23763	100.936	1.27697	40.799	-40.799	1.50472	1.25395
2015-01-07 16:30:00	8.20881	32.0063	8.23613	2.24849	100.946	1.27706	69.9512	-69.9512	1.8231	1.71742
2015-01-07 17:00:00	8.29697	38.9079	8.32827	2.25876	100.946	1.27701	50.5292	-50.5292	2.22811	2.16524
2015-01-07 17:30:00	7.57894	25.8495	7.59537	2.17986	100.959	1.27752	54.2008	-54.2008	2.4124	2.34671
2015-01-07 18:00:00	9.53513	5.01687	9.53704	2.13263	100.989	1.27809	69.8399	-69.8399	1.86164	1.7557
2015-01-07 18:30:00	-0.440213	8.75025	-0.440822	2.05754	101.022	1.27883	69.8106	-69.8106	2.05149	1.93093
2015-01-07 19:00:00	5.9168	9.29068	5.91122	2.02961	101.047	1.27923	68.4866	-68.4866	1.74422	1.66128
2015-01-07 19:30:00	3.22756	12.5407	3.21484	1.97752	101.056	1.27954	63.4686	-63.4686	1.983	1.91404
2015-01-07 20:00:00	4.35763	6.77923	4.3367	1.83019	101.066	1.2802	59.539	-59.539	2.76358	2.70586
2015-01-07 20:30:00	-0.389131	7.56459	-0.418782	1.80468	101.072	1.28029	69.2596	-69.2596	2.21832	2.15438
2015-01-07 21:00:00	4.1152	3.08984	4.09922	1.75776	101.068	1.28045	75.6093	-75.6093	2.0793	2.02869
2015-01-07 21:30:00	5.86364	14.8066	5.79249	1.46108	101.057	1.28165	63.3755	-63.3755	2.28115	2.20809
2015-01-07 22:00:00	-31.4959	20.069	-31.6046	0.607989	101.049	1.28528	62.6659	-62.6659	2.92102	2.83586
2015-01-07 22:30:00	-23.9471	21.1152	-24.11	0.240124	101.067	1.28704	70.4802	-70.4802	2.3956	2.31161
2015-01-07 23:00:00	-8.54274	9.43771	-8.62903	0.0146675	101.089	1.28829	71.9245	-71.9245	2.70599	2.64366
2015-01-07 23:30:00	-1.85895	2.12889	-1.87951	-0.333295	101.095	1.28996	65.9983	-65.9983	2.23145	2.1593
2015-01-08	-0.741073	11.9007	-0.878263	-0.496531	101.104	1.29083	78.6167	-78.6167	2.03666	1.98484
2015-01-08 00:30:00	-1.56321	4.32056	-1.61113	-0.624575	101.099	1.29136	82.4458	-82.4458	1.99312	1.93521
2015-01-08 01:00:00	-0.718202	1.98804	-0.740611	-0.751563	101.108	1.29206	86.4536	-86.4536	2.15613	2.11537
2015-01-08 01:30:00	-0.0793987	7.14177	-0.167102	-0.872382	101.121	1.29278	97.3757	-97.3757	2.83233	2.78971
2015-01-08 02:00:00	0.590949	8.38288	0.487313	-1.13204	101.128	1.29411	87.875	-87.875	3.06808	3.03219
2015-01-08 02:30:00	9.98248	14.2168	9.78631	-1.15486	101.145	1.29443	107.272	-107.272	1.68499	1.56632
2015-01-08 03:00:00	0.756272	0.894289	0.744394	-1.25023	101.128	1.29473	114.057	-114.057	2.57178	2.5477
2015-01-08 03:30:00	-54.6461	-35.756	-54.1907	-1.51287	101.106	1.29584	170.887	-170.887	1.12535	0.679962
2015-01-08 04:00:00	-3.93377	-0.773726	-3.92566	-2.72556	101.091	1.30185	212.387	147.613	0.927167	0.851171
2015-01-08 04:30:00	-6.29653	-8.81564	-6.25243	-3.0764	101.063	1.30328	220.21	139.79	0.682177	0.581352
2015-01-08 05:00:00	5.82465	-5.35002	5.85066	-3.09668	101.063	1.30323	225.511	134.489	0.635538	0.541273
2015-01-08 05:30:00	-4.92693	2.02674	-4.93487	-3.26514	101.049	1.30379	255.417	104.583	1.39878	1.33857
2015-01-08 06:00:00	-3.30813	-7.20287	-3.25286	-3.45879	101.047	1.30469	239.51	120.49	0.758461	0.651373
2015-01-08 06:30:00	-0.817314	-5.39599	-0.778265	-3.81724	101.056	1.30655	220.805	139.195	0.51458	0.410637
2015-01-08 07:00:00	0.501057	-1.14909	0.508312	-3.99549	101.063	1.30752	252.214	107.786	0.78621	0.638434
2015-01-08 07:30:00	-1.96282	3.49806	-1.98382	-3.93161	101.079	1.30743	277.351	82.6487	1.30588	1.22501
2015-01-08 08:00:00	-24.767	-31.2846	-24.4971	-3.48301	101.089	1.30531	266.878	93.1219	1.29064	1.19695
2015-01-08 08:30:00	1.00863	-4.69362	1.03731	-3.78226	101.095	1.30693	267.725	92.2751	1.47892	1.42475
2015-01-08 09:00:00	-18.5143	-0.542675	-18.4922	-3.65962	101.093	1.30637	270.327	89.6735	1.50873	1.4337
2015-01-08 09:30:00	-1.96358	1.47569	-1.96965	-3.68701	101.074	1.30629	280.462	79.5379	1.1481	1.04248
2015-01-08 10:00:00	-4.13665	9.48122	-4.17748	-3.46112	101.05	1.30495	261.277	98.7227	1.52075	1.46752
2015-01-08 10:30:00	-26.0756	129.7	-26.6174	-3.04014	101.021	1.30257	285.685	74.3151	0.908055	0.723773
2015-01-08 11:00:00	3.73503	11.6076	3.68706	-2.24749	100.972	1.29817	282.675	77.3251	0.897255	0.682066
2015-01-08 11:30:00	0.968918	33.2172	0.847345	-1.50802	100.914	1.29391	278.492	81.5078	0.918481	0.783622
2015-01-08 12:00:00	2.60106	31.9297	2.49706	-0.667773	100.846	1.28909	92.6059	-92.6059	0.532134	0.0549602
2015-01-08 12:30:00	2.19954	59.5817	2.01772	0.456619	100.775	1.2829	75.5554	-75.5554	0.984798	0.746275
2015-01-08 13:00:00	-0.797617	36.8223	-0.921707	1.35104	100.717	1.27796	85.7178	-85.7178	1.64162	1.53767
2015-01-08 13:30:00	19.2645	130.298	18.7014	2.26683	100.676	1.27311	78.4474	-78.4474	1.67587	1.48082
2015-01-08 14:00:00	37.0072	89.0383	36.55	3.08973	100.641	1.26883	84.7974	-84.7974	1.89264	1.64652
2015-01-08 14:30:00	19.6738	67.2363	19.479	3.30453	100.626	1.26783	103.805	-103.805	2.49017	2.34384
2015-01-08 15:00:00	17.0718	45.2429	16.966	3.58061	100.63	1.26667	88.8649	-88.8649	2.91272	2.77199
2015-01-08 15:30:00	41.0855	38.0747	41.0102	3.94314	100.629	1.26505	98.0937	-98.0937	2.9679	2.87333
2015-01-08 16:00:00	26.3531	37.5691	26.2946	4.35934	100.63	1.26318	95.6415	-95.6415	2.58651	2.45724
2015-01-08 16:30:00	7.85544	35.9267	7.80584	4.37214	100.629	1.26311	99.3863	-99.3863	3.10673	3.01873
2015-01-08 17:00:00	14.0366	8.69994	14.0174	4.12055	100.634	1.26429	101.714	-101.714	3.6154	3.55606
2015-01-08 17:30:00	6.23503	7.94711	6.21245	3.97941	100.647	1.26502	94.6712	-94.6712	2.69947	2.59478
2015-01-08 18:00:00	13.9411	-5.68693	13.9498	3.79797	100.645	1.2658	90.4059	-90.4059	3.4288	3.34878
2015-01-08 18:30:00	19.0038	-16.0384	19.0354	3.78315	100.647	1.26592	103.856	-103.856	3.79438	3.72299
2015-01-08 19:00:00	10.7482	-14.5909	10.778	3.80705	100.653	1.26591	111.513	-111.513	4.29293	4.19048
2015-01-08 19:30:00	12.3314	-19.866	12.3837	3.6737	100.682	1.26682	92.378	-92.378	1.05771	0.208172
2015-01-08 20:00:00	-1.73853	-8.89891	-1.71678	3.93968	100.689	1.26575	146.43	-146.43	0.780109	0.601507
2015-01-08 20:30:00	6.95679	-7.29232	6.97851	3.52802	100.693	1.26758	357.853	2.14727	1.17959	1.08139
2015-01-08 21:00:00	2.30092	-7.52069	2.33185	3.16063	100.696	1.26923	13.9409	-13.9409	1.58154	1.51184
2015-01-08 21:30:00	9.49662	-21.5809	9.60853	2.42736	100.71	1.27268	323.034	36.9655	1.40618	1.22419
2015-01-08 22:00:00	-3.56254	4.82784	-3.5888	1.97722	100.721	1.27484	267.064	92.9357	0.809613	0.732648
2015-01-08 22:30:00	-0.377054	-1.61309	-0.365659	1.72725	100.728	1.27605	259.193	100.807	0.914795	0.86688
2015-01-08 23:00:00	-4.46775	-12.323	-4.3778	1.20402	100.754	1.2788	238.184	121.816	1.11417	1.03341
2015-01-08 23:30:00	0.28207	2.37108	0.267617	0.8507	100.769	1.28072	229.105	130.895	1.30972	1.21168
2015-01-09	-1.91064	-8.42435	-1.86051	0.939369	100.78	1.28048	235.471	124.529	1.49378	1.38069
2015-01-09 00:30:00	3.41656	-21.7989	3.5328	1.28387	100.775	1.27883	257.523	102.477	2.40733	2.35831
2015-01-09 01:00:00	8.74964	-8.83395	8.78554	1.95833	100.779	1.27579	276.156	83.8442	2.24271	2.17351
2015-01-09 01:30:00	0.641947	-1.93079	0.648425	2.83172	100.803	1.27216	265.291	94.7087	1.31986	1.25725
2015-01-09 02:00:00	0.610221	1.64498	0.604441	2.92253	100.819	1.27197	277.184	82.8156	0.583008	0.46572
2015-01-09 02:30:00	-0.275858	-5.05885	-0.260402	2.86426	100.85	1.27266	197.261	162.739	0.825713	0.495432
2015-01-09 03:00:00	-1.44544	3.14119	-1.45137	3.18644	100.868	1.27149	212.765	147.235	2.01094	1.92335
2015-01-09 03:30:00	9.80618	-23.4905	9.83704	3.02501	100.871	1.27232	213.624	146.376	2.95491	2.85657
2015-01-09 04:00:00	3.91835	-14.327	3.93514	2.52572	100.858	1.27448	222.34	137.66	4.31113	4.19175
2015-01-09 04:30:00	9.61932	-32.2718	9.65344	2.24036	100.841	1.2756	216.915	143.085	4.45326	4.33767
2015-01-09 05:00:00	5.66831	-23.3581	5.69182	1.94448	100.836	1.2769	214.861	145.139	3.72344	3.60797
2015-01-09 05:30:00	5.77579	-10.4924	5.78453	1.59695	100.822	1.27835	216.622	143.378	2.79013	2.68254
2015-01-09 06:00:00	6.47795	-19.9039	6.49167	1.42176	100.814	1.27909	216.209	143.791	2.43986	2.27921
2015-01-09 06:30:00	11.9209	-23.3742	11.9205	1.52851	100.833	1.2789	218.385	141.615	3.62401	3.404
2015-01-09 07:00:00	7.46061	-20.2243	7.46113	1.14354	100.851	1.28092	229.393	130.607	3.77005	3.62477
2015-01-09 07:30:00	3.19832	-13.5309	3.19636	0.956637	100.847	1.28176	223.878	136.122	6.12341	5.97174
2015-01-09 08:00:00	4.12476	-6.34892	4.12384	0.747122	100.869	1.28302	221.823	138.177	6.5128	6.37177
2015-01-09 08:30:00	2.25546	-6.28879	2.2542	0.65754	100.894	1.28377	226.687	133.313	7.71029	7.54706
2015-01-09 09:00:00	3.3317	13.132	3.33111	0.501114	100.925	1.28487	232.113	127.887	6.15377	5.97712
2015-01-09 09:30:00	2.83517	-15.5262	2.83799	0.582207	100.979	1.28517	238.334	121.666	3.41235	3.16433
2015-01-09 10:00:00	3.85713	23.298	3.85651	1.1914	101.007	1.28267	243.138	116.862	2.51531	2.33165
2015-01-09 10:30:00	5.05184	39.7272	5.05777	1.71623	100.994	1.28008	235.239	124.761	3.19956	3.00072
2015-01-09 11:00:00	6.07266	56.0384	6.08405	2.16737	100.99	1.27793	225.042	134.958	3.05402	2.86961
2015-01-09 11:30:00	5.01772	76.565	5.0359	2.87135	100.957	1.27426	210.481	149.519	3.26849	3.04284
2015-01-09 12:00:00	4.318	58.5854	4.33157	3.10542	100.922	1.27275	212.325	147.675	3.80943	3.57817
2015-01-09 12:30:00	3.82963	67.0168	3.8539	3.51621	100.881	1.27034	218.215	141.785	3.12595	2.93325
2015-01-09 13:00:00	2.29567	69.4831	2.30901	3.81656	100.817	1.26815	229.989	130.011	3.25256	3.00787
2015-01-09 13:30:00	5.88609	54.6488	5.89658	3.988	100.777	1.26686	230.241	129.759	3.73106	3.55803
2015-01-09 14:00:00	6.65639	60.8048	6.6772	4.7724	100.733	1.26275	231.323	128.677	2.49891	2.22605
2015-01-09 14:30:00	0.525125	57.3278	0.551867	5.24413	100.701	1.26022	229.692	130.308	3.22715	3.0386
2015-01-09 15:00:00	5.74141	62.6741	5.76673	5.71302	100.699	1.25807	229.886	130.114	2.85348	2.58855
2015-01-09 15:30:00	8.76573	50.5964	8.75817	6.00263	100.689	1.25659	222.822	137.178	3.4489	3.28811
2015-01-09 16:00:00	-0.767152	12.1191	-0.765838	6.24094	100.686	1.2555	236.848	123.152	2.93644	2.7882
2015-01-09 16:30:00	1.36803	22.5295	1.36183	6.80246	100.67	1.25276	204.602	155.398	2.13774	1.95959
2015-01-09 17:00:00	5.32733	11.8275	5.31841	7.10602	100.672	1.25138	182.768	177.232	3.41092	3.25601
2015-01-09 17:30:00	2.43552	0.225601	2.43512	7.04958	100.686	1.25182	183.573	176.427	2.90495	2.78469
2015-01-09 18:00:00	3.46657	-1.20823	3.46668	7.10963	100.705	1.25182	169.331	-169.331	4.067	4.02932
2015-01-09 18:30:00	4.86606	-4.54268	4.86703	7.13126	100.713	1.25181	159.142	-159.142	3.87744	3.83519
2015-01-09 19:00:00	-20.9021	51.8942	-20.9368	6.66995	100.699	1.25367	135.39	-135.39	4.89255	4.75713
2015-01-09 19:30:00	6.98007	-7.13335	6.98944	6.04557	100.689	1.25626	118.342	-118.342	5.48352	5.43589
2015-01-09 20:00:00	10.1308	-11.477	10.1489	5.76089	100.671	1.2573	116.579	-116.579	4.40995	4.31147
2015-01-09 20:30:00	-2.08769	3.90882	-2.09619	5.40003	100.671	1.25888	124.832	-124.832	4.30816	4.22948
2015-01-09 21:00:00	9.91091	-17.5663	9.96544	5.03913	100.653	1.2602	118.689	-118.689	5.24781	5.19196
2015-01-09 21:30:00	1.92228	-6.13618	1.94587	4.72902	100.65	1.26151	118.581	-118.581	4.26225	4.20229
2015-01-09 22:00:00	6.0999	-11.204	6.14267	4.44451	100.622	1.26244	114.265	-114.265	4.353	4.26464
2015-01-09 22:30:00	5.4222	-16.8834	5.49016	4.05777	100.585	1.26373	111.773	-111.773	5.50996	5.41131
2015-01-09 23:00:00	6.08953	-20.5103	6.18021	3.79096	100.561	1.26462	107.095	-107.095	5.39755	5.31508
2015-01-09 23:30:00	11.4492	-23.8565	11.5484	3.53847	100.55	1.26564	109.538	-109.538	5.09301	5.00037
2015-01-10	6.89122	-16.5452	6.95222	3.70951	100.524	1.26458	116.274	-116.274	6.16711	6.09214
2015-01-10 00:30:00	9.47252	-26.0132	9.5665	3.6523	100.489	1.26442	111.764	-111.764	6.25537	6.1827
2015-01-10 01:00:00	5.93497	-15.3568	5.99404	3.54754	100.477	1.26472	120.298	-120.298	4.89104	4.84399
2015-01-10 01:30:00	2.71746	-13.1903	2.77393	3.44382	100.468	1.26505	122.475	-122.475	3.89684	3.8679
2015-01-10 02:00:00	-1.65367	3.28903	-1.66775	3.31405	100.451	1.26541	120.992	-120.992	2.51881	2.44919
2015-01-10 02:30:00	1.74791	-0.150263	1.74709	3.2346	100.455	1.26582	146.901	-146.901	1.51414	1.43682
2015-01-10 03:00:00	2.43155	-0.785598	2.43325	3.1244	100.46	1.26637	148.012	-148.012	1.08495	1.02233
2015-01-10 03:30:00	-4.75434	13.0227	-4.80802	3.28895	100.442	1.26544	133.274	-133.274	1.9173	1.8362
2015-01-10 04:00:00	-2.41884	18.8633	-2.50554	2.9131	100.394	1.26655	105.34	-105.34	2.16399	2.11751
2015-01-10 04:30:00	10.0258	-13.0811	10.0803	2.37672	100.369	1.26867	113.128	-113.128	2.22631	2.17514
2015-01-10 05:00:00	-6.63572	6.0382	-6.65699	2.24628	100.335	1.26888	105.908	-105.908	1.97024	1.92481
2015-01-10 05:30:00	-37.0759	135.176	-37.5207	3.22441	100.292	1.26395	123.669	-123.669	2.58813	2.48662
2015-01-10 06:00:00	-4.77126	13.3806	-4.78528	4.87568	100.253	1.25615	136.081	-136.081	4.15699	4.11644
2015-01-10 06:30:00	-6.70526	32.1532	-6.72666	5.11665	100.233	1.25485	149.161	-149.161	3.8995	3.86856
2015-01-10 07:00:00	5.50559	-15.6643	5.57463	1.86166	100.238	1.26942	196.972	163.028	0.692494	0.292353
2015-01-10 07:30:00	0.359974	-17.6554	0.451055	0.996269	100.249	1.27351	331.902	28.098	0.866949	0.686933
2015-01-10 08:00:00	3.0201	-8.89416	3.05928	0.888125	100.257	1.27416	303.241	56.7587	1.29468	1.0254
2015-01-10 08:30:00	-16.3053	56.1032	-16.5131	2.00638	100.275	1.26928	230.491	129.509	0.598149	0.335807
2015-01-10 09:00:00	-8.12775	30.4584	-8.19109	3.19124	100.274	1.26397	249.143	110.857	1.43422	1.35465
2015-01-10 09:30:00	-14.3919	82.8606	-14.5123	3.83276	100.251	1.26083	230.458	129.542	1.13904	1.04262
2015-01-10 10:00:00	-0.575837	8.30765	-0.59759	3.24674	100.214	1.26293	182.66	177.34	1.14423	0.929506
2015-01-10 10:30:00	12.0749	-23.0731	12.1242	4.38948	100.173	1.25724	170.524	-170.524	1.17856	1.06566
2015-01-10 11:00:00	20.2731	-41.7401	20.3293	6.12264	100.12	1.24885	169.178	-169.178	2.00688	1.87246
2015-01-10 11:30:00	12.7367	-19.2247	12.7697	7.07396	100.073	1.24397	180.058	179.942	2.05748	1.98217
2015-01-10 12:00:00	21.6615	5.9382	21.6306	7.51939	100.028	1.24134	233.353	126.647	0.999824	0.840035
2015-01-10 12:30:00	27.8937	-15.9811	27.9199	8.72861	99.978	1.23545	160.299	-160.299	0.883544	0.432234
2015-01-10 13:00:00	40.1827	42.9478	40.0562	9.40891	99.9302	1.23188	81.5813	-81.5813	1.84623	1.67033
2015-01-10 13:30:00	25.1778	12.0169	25.1481	9.70063	99.8822	1.23008	104.799	-104.799	3.54191	3.45991
2015-01-10 14:00:00	18.9395	0.564138	18.9337	10.4068	99.8449	1.22659	91.6188	-91.6188	2.99101	2.74035
2015-01-10 14:30:00	-3.78275	-3.15297	-3.77828	10.9598	99.8226	1.22395	96.1003	-96.1003	2.17085	1.80397
2015-01-10 15:00:00	14.191	24.7007	14.1879	12.0466	99.8281	1.21945	169.533	-169.533	3.8357	3.65743
2015-01-10 15:30:00	21.6569	34.3951	21.6588	12.3364	99.8336	1.21829	175.007	-175.007	5.52425	5.40684
2015-01-10 16:00:00	19.1577	29.0036	19.1608	12.582	99.8534	1.21749	181.397	178.603	5.30601	5.14363
2015-01-10 16:30:00	33.0637	8.1142	33.0565	12.4583	99.8951	1.21847	171.336	-171.336	4.70512	4.53866
2015-01-10 17:00:00	-2.53974	-5.61322	-2.54016	12.329	99.9272	1.21947	167.926	-167.926	3.39013	3.27113
2015-01-10 17:30:00	-0.179813	-3.08303	-0.178851	12.1657	99.9465	1.22037	150.775	-150.775	3.98414	3.84249
2015-01-10 18:00:00	-8.35765	-10.8946	-8.35852	11.4012	99.9689	1.22396	143.313	-143.313	5.14745	5.02619
2015-01-10 18:30:00	-4.43819	23.7438	-4.44315	10.7555	99.9919	1.227	141.677	-141.677	4.70758	4.5696
2015-01-10 19:00:00	-6.33606	22.7381	-6.37122	9.54031	100.022	1.23252	109.691	-109.691	2.54503	2.46359
2015-01-10 19:30:00	-32.9927	81.2522	-33.1975	9.42826	100.05	1.23326	114.529	-114.529	3.27927	3.21748
2015-01-10 20:00:00	-16.8175	70.9669	-17.0273	9.10897	100.079	1.23498	121.752	-121.752	3.06704	3.01635
2015-01-10 20:30:00	-9.02438	7.48447	-9.04121	9.16427	100.108	1.23512	132.419	-132.419	3.63669	3.55999
2015-01-10 21:00:00	-11.355	33.0254	-11.4464	8.50349	100.158	1.23862	232.277	127.723	2.21358	0.46922
2015-01-10 21:30:00	3.42244	5.62943	3.41186	8.40943	100.2	1.23967	289.588	70.4118	4.31921	4.2829
2015-01-10 22:00:00	1.03575	13.5373	1.01085	8.50427	100.234	1.23966	286.501	73.4994	4.25373	4.19327
2015-01-10 22:30:00	4.44198	-14.6917	4.47417	7.81528	100.28	1.24322	276.787	83.2126	3.43917	3.42209
2015-01-10 23:00:00	15.6815	-45.4465	15.7867	7.15051	100.345	1.24696	283.297	76.7026	4.77484	4.74016
2015-01-10 23:30:00	0.805057	-25.3845	0.860155	6.49723	100.405	1.25065	286.508	73.492	5.45002	5.36824
2015-01-11	19.783	-35.4362	19.8559	6.03419	100.441	1.25316	281.733	78.2675	6.65361	6.55966
2015-01-11 00:30:00	1.68584	-25.9271	1.73639	5.42084	100.488	1.25654	280.771	79.2293	7.00796	6.90997
2015-01-11 01:00:00	5.62782	-31.0381	5.69163	4.82681	100.54	1.25987	290.202	69.7982	6.31862	6.19435
2015-01-11 01:30:00	-5.12152	-1.36182	-5.11497	4.27192	100.586	1.2629	293.491	66.5094	7.20644	7.10988
2015-01-11 02:00:00	-0.733811	-2.53359	-0.72449	3.63851	100.641	1.26643	294.701	65.2988	7.80505	7.72671
2015-01-11 02:30:00	2.98501	-14.1842	3.03437	3.23725	100.697	1.26896	296.125	63.8752	8.28374	8.19118
2015-01-11 03:00:00	3.75544	-14.7755	3.80455	3.04431	100.747	1.27049	294.881	65.1192	8.54246	8.44202
2015-01-11 03:30:00	4.18008	-15.2241	4.22702	2.81938	100.786	1.27204	297.12	62.8797	8.04437	7.94375
2015-01-11 04:00:00	4.22534	-11.3262	4.25565	2.46929	100.809	1.27398	293.824	66.1758	7.84114	7.74265
2015-01-11 04:30:00	5.76058	-4.16244	5.76849	2.17903	100.841	1.27576	288.414	71.5858	6.06266	5.96065
2015-01-11 05:00:00	5.40404	-5.47837	5.41354	1.65419	100.875	1.27866	292.949	67.0511	6.68764	6.60243
2015-01-11 05:30:00	6.11583	-12.9174	6.1357	1.36778	100.926	1.28068	292.156	67.8443	6.47033	6.38318
2015-01-11 06:00:00	3.71398	-17.9136	3.74086	1.15935	100.971	1.28224	286.072	73.9276	5.68435	5.57021
2015-01-11 06:30:00	4.72374	-31.4009	4.77039	0.797321	100.997	1.28426	280.45	79.5497	7.66417	7.58633
2015-01-11 07:00:00	2.63267	-27.3566	2.67828	0.504513	101.025	1.28597	274.412	85.588	9.01335	8.95711
2015-01-11 07:30:00	2.89669	-12.5995	2.91939	0.122843	101.119	1.28896	277.628	82.3721	5.43525	5.29549
2015-01-11 08:00:00	0.736934	2.0666	0.732608	-0.139499	101.211	1.29136	291.712	68.288	3.4128	3.3414
2015-01-11 08:30:00	0.342732	-4.03804	0.350509	-0.13808	101.273	1.29215	274.465	85.5349	0.801005	0.718264
2015-01-11 09:00:00	4.01293	2.76704	4.00669	0.117844	101.31	1.29143	292.65	67.3504	0.771209	0.3916
2015-01-11 09:30:00	24.4169	33.3953	24.3409	0.339153	101.335	1.29068	278.031	81.9691	0.904327	0.68915
2015-01-11 10:00:00	-0.222533	31.2576	-0.296576	0.791783	101.356	1.28877	257.736	102.264	0.710174	0.515396
2015-01-11 10:30:00	-1.57828	103.483	-1.79634	1.10122	101.368	1.2875	305.336	54.664	0.696384	0.407749
2015-01-11 11:00:00	8.88453	106.017	8.62489	1.42108	101.354	1.28579	315.282	44.7181	1.42179	1.26745
2015-01-11 11:30:00	2.8173	83.7398	2.64784	1.78638	101.34	1.28394	314.442	45.5577	1.01411	0.823757
2015-01-11 12:00:00	13.3878	11.5162	13.3551	2.19406	101.301	1.28152	337.023	22.9773	0.822532	0.418859
2015-01-11 12:30:00	3.00264	132.702	2.7152	2.79983	101.248	1.27805	39.4864	-39.4864	0.856536	0.453146
2015-01-11 13:00:00	17.5465	107.014	17.3492	3.14914	101.2	1.27587	76.8474	-76.8474	1.39281	1.10194
2015-01-11 13:30:00	-14.7224	183.989	-15.0449	3.63726	101.168	1.27321	63.7514	-63.7514	1.58781	1.43135
2015-01-11 14:00:00	5.56578	138.759	5.31765	3.95854	101.15	1.27151	105.078	-105.078	2.3792	2.14107
2015-01-11 14:30:00	-0.872261	153.294	-1.10869	4.01644	101.146	1.27121	104.084	-104.084	2.74891	2.43734
2015-01-11 15:00:00	12.9163	121.558	12.748	4.48607	101.147	1.2691	105.46	-105.46	2.1016	1.80675
2015-01-11 15:30:00	2.08207	86.5581	1.95378	4.51966	101.165	1.26915	110.49	-110.49	3.4649	3.13845
2015-01-11 16:00:00	13.4025	77.4603	13.2873	4.68883	101.19	1.2687	94.2856	-94.2856	3.21062	3.09176
2015-01-11 16:30:00	5.45083	70.8358	5.3349	4.75062	101.205	1.26859	102.311	-102.311	2.80924	2.66026
2015-01-11 17:00:00	22.3932	24.7472	22.318	4.64299	101.234	1.26936	94.4838	-94.4838	2.54293	2.38315
2015-01-11 17:30:00	-3.62574	28.2392	-3.75274	4.57693	101.258	1.26978	75.8982	-75.8982	2.76063	2.6951
2015-01-11 18:00:00	-3.6052	7.96459	-3.65967	4.41406	101.285	1.27062	86.8838	-86.8838	3.54337	3.52505
2015-01-11 18:30:00	7.11957	12.85	7.00092	4.38463	101.323	1.27114	79.8436	-79.8436	2.92737	2.8221
2015-01-11 19:00:00	2.02811	5.42243	1.97488	4.19102	101.345	1.27224	81.7774	-81.7773	4.02643	3.97751
2015-01-11 19:30:00	7.19251	-1.85235	7.19753	4.03858	101.365	1.27316	89.2508	-89.2508	4.40364	4.37101
2015-01-11 20:00:00	5.32597	12.9333	5.1847	3.84304	101.395	1.27438	88.2062	-88.2062	4.47296	4.41074
2015-01-11 20:30:00	5.47809	6.05668	5.40705	3.70142	101.433	1.27551	93.172	-93.172	3.41263	3.36057
2015-01-11 21:00:00	7.36355	4.56217	7.30439	3.6167	101.462	1.27628	97.644	-97.644	2.77278	2.65935
2015-01-11 21:30:00	6.60746	17.3868	6.4174	3.40141	101.484	1.27753	99.6646	-99.6646	3.09253	2.99584
2015-01-11 22:00:00	5.73227	1.81136	5.70239	3.16851	101.5	1.27879	95.2143	-95.2143	3.85526	3.78267
2015-01-11 22:30:00	11.7404	-0.197893	11.7211	3.05712	101.517	1.27957	95.7316	-95.7316	3.41614	3.3134
2015-01-11 23:00:00	13.5588	13.5878	13.4025	2.78175	101.519	1.28089	88.6684	-88.6684	3.40554	3.25014
2015-01-11 23:30:00	10.9381	56.1204	10.3438	1.5523	101.526	1.28666	51.1381	-51.1381	4.02956	3.93302
2015-01-12	-2.10721	-9.21385	-2.01462	0.92518	101.525	1.28965	66.7099	-66.7099	4.32979	4.21238
2015-01-12 00:30:00	2.12509	3.86968	2.08444	0.596922	101.533	1.29131	71.1861	-71.1862	3.6699	3.58488
2015-01-12 01:00:00	6.00647	-3.48471	6.02922	0.349367	101.539	1.29256	71.1856	-71.1856	4.09828	4.02794
2015-01-12 01:30:00	6.09997	-3.62844	6.12321	0.352757	101.556	1.29279	82.2494	-82.2494	3.68074	3.60001
2015-01-12 02:00:00	1.48582	-1.49752	1.49696	0.439799	101.576	1.29265	90.4269	-90.4269	3.34333	3.28733
2015-01-12 02:30:00	2.47924	0.542091	2.47035	0.492074	101.596	1.29266	89.2407	-89.2407	2.8913	2.82175
2015-01-12 03:00:00	9.15208	-6.54326	9.19477	0.175665	101.608	1.29433	81.9438	-81.9438	3.75096	3.68453
2015-01-12 03:30:00	7.7765	-4.61596	7.80486	-0.044959	101.61	1.2954	84.7234	-84.7234	3.65367	3.57389
2015-01-12 04:00:00	2.94028	7.7539	2.86465	-0.212289	101.608	1.29613	92.5735	-92.5735	3.50842	3.40824
2015-01-12 04:30:00	4.82354	16.8361	4.65888	-0.328238	101.612	1.29672	100.976	-100.976	3.68552	3.58312
2015-01-12 05:00:00	7.181	11.0805	7.06444	-0.505079	101.612	1.29755	106.395	-106.395	3.50259	3.39103
2015-01-12 05:30:00	10.4452	8.83625	10.3421	-0.700589	101.612	1.29847	102.559	-102.559	1.87812	1.73104
2015-01-12 06:00:00	0.602466	3.6814	0.565332	-0.852491	101.623	1.29932	98.8314	-98.8314	0.884106	0.621093
2015-01-12 06:30:00	-1.41765	-0.363671	-1.41155	-1.05296	101.645	1.30055	142.064	-142.064	0.619568	0.397879
2015-01-12 07:00:00	1.48661	1.06919	1.47341	-1.10975	101.666	1.30109	85.6839	-85.6839	1.12726	1.03564
2015-01-12 07:30:00	2.96025	12.6846	2.82813	-1.74856	101.686	1.30441	207.124	152.876	0.323488	0.1108
2015-01-12 08:00:00	6.82194	10.9107	6.71502	-2.27123	101.703	1.30724	232.378	127.622	0.548902	0.391262
2015-01-12 08:30:00	-0.932027	-1.79713	-0.914538	-2.51683	101.727	1.30873	234.232	125.768	0.681832	0.557926
2015-01-12 09:00:00	-0.113386	-0.729477	-0.10637	-2.54876	101.76	1.30927	224.957	135.043	0.472276	0.29949
2015-01-12 09:30:00	8.52297	8.63373	8.43017	-2.38967	101.784	1.30883	193.822	166.178	0.532782	0.356989
2015-01-12 10:00:00	4.65035	5.42928	4.59674	-2.27468	101.811	1.30867	198.928	161.072	0.653451	0.50313
2015-01-12 10:30:00	-2.9171	7.20115	-2.97591	-1.97539	101.818	1.30729	227.667	132.333	0.786295	0.601554
2015-01-12 11:00:00	-0.63346	37.3925	-0.99359	-1.49594	101.793	1.30459	240.044	119.956	0.623081	0.416925
2015-01-12 11:30:00	-0.301936	37.4822	-0.673475	-0.942922	101.746	1.30131	273.723	86.2768	0.684395	0.17841
2015-01-12 12:00:00	2.19587	61.9555	1.57656	-0.317997	101.68	1.29748	79.3566	-79.3566	1.41086	0.613793
2015-01-12 12:30:00	18.2865	85.5134	17.4681	0.249148	101.614	1.29401	79.851	-79.851	2.25871	1.99365
2015-01-12 13:00:00	9.68337	144.053	8.38414	0.544033	101.563	1.292	115.402	-115.402	3.8093	3.62702
2015-01-12 13:30:00	47.4398	103.091	46.561	1.00824	101.516	1.2893	120.855	-120.855	3.62302	3.4102
2015-01-12 14:00:00	-3.763	96.6519	-4.40355	1.34724	101.471	1.28724	124.238	-124.238	3.92762	3.79574
2015-01-12 14:30:00	51.5966	128.226	50.9143	1.81803	101.452	1.28496	82.5011	-82.5011	3.14337	2.9547
2015-01-12 15:00:00	10.7632	40.5055	10.5994	2.05453	101.426	1.28362	87.7569	-87.7569	3.76168	3.68024
2015-01-12 15:30:00	6.05269	58.5855	5.80446	2.50894	101.4	1.28114	67.1177	-67.1177	3.14307	2.90411
2015-01-12 16:00:00	15.6173	39.3053	15.4489	2.84243	101.38	1.27936	64.3561	-64.3561	2.21695	1.96202
2015-01-12 16:30:00	7.80384	47.7317	7.65599	3.02538	101.369	1.27847	76.2925	-76.2925	2.63197	2.33522
2015-01-12 17:00:00	81.9161	-9.25032	81.8955	2.87638	101.375	1.27917	93.1698	-93.1698	3.11775	2.79504
2015-01-12 17:30:00	1.80038	-1.14767	1.80852	1.86661	101.395	1.28356	191.056	168.944	1.031	0.910003
2015-01-12 18:00:00	-3.92451	5.03974	-3.96956	1.23696	101.416	1.28674	209.765	150.235	1.14282	1.05735
2015-01-12 18:30:00	0.903403	-1.92048	0.921847	0.90081	101.446	1.28869	215.028	144.972	0.863723	0.785142
2015-01-12 19:00:00	0.156248	-4.24994	0.199626	0.754922	101.457	1.28953	228.402	131.598	0.634103	0.558935
2015-01-12 19:30:00	-5.30782	-4.57503	-5.25198	0.650512	101.477	1.29029	218.667	141.333	0.563887	0.494041
2015-01-12 20:00:00	3.04421	-7.37896	3.11126	0.557386	101.464	1.29059	239.655	120.345	1.15634	1.09579
2015-01-12 20:30:00	8.03499	-7.70788	8.09028	0.854116	101.452	1.28913	248.967	111.033	0.666174	0.629139
2015-01-12 21:00:00	-1.18073	-1.70474	-1.16251	0.373638	101.45	1.29132	252.929	107.071	1.22975	1.1825
2015-01-12 21:30:00	6.07616	2.72788	6.03967	0.381436	101.452	1.2913	296.142	63.8577	1.62601	1.55711
2015-01-12 22:00:00	1.82946	-4.70175	1.87166	0.570944	101.45	1.29037	336.561	23.4387	1.75143	1.72448
2015-01-12 22:30:00	6.57788	-4.30637	6.60436	0.732764	101.436	1.28953	353.897	6.10251	1.84539	1.81062
2015-01-12 23:00:00	0.652914	5.4027	0.605208	0.533613	101.428	1.29035	319.26	40.7405	1.37099	1.32491
2015-01-12 23:30:00	9.01224	-21.533	9.17769	0.501019	101.395	1.29012	333.298	26.7018	1.12594	0.832457
2015-01-13	1.09763	-0.210814	1.09775	-0.543969	101.357	1.29448	241.148	118.852	0.521265	0.453211
2015-01-13 00:30:00	1.36926	-4.71181	1.4115	-0.814047	101.338	1.29552	217.071	142.929	0.446543	0.369721
2015-01-13 01:00:00	-0.359447	-5.56115	-0.306723	-1.19125	101.328	1.2972	241.766	118.234	0.854892	0.772192
2015-01-13 01:30:00	-0.256475	-0.868385	-0.247859	-1.38447	101.326	1.29809	217.25	142.75	0.458379	0.328562
2015-01-13 02:00:00	-0.0807131	-1.38181	-0.0677465	-1.63987	101.332	1.2994	229.668	130.332	0.787324	0.696625
2015-01-13 02:30:00	-0.520088	2.15896	-0.539254	-1.80504	101.326	1.30012	236.185	123.815	0.783694	0.708439
2015-01-13 03:00:00	0.827399	1.2504	0.814434	-2.11324	101.317	1.30149	240.129	119.871	1.42226	1.35756
2015-01-13 03:30:00	-0.347457	0.199596	-0.348709	-2.31584	101.293	1.30216	246.433	113.567	1.35096	1.31396
2015-01-13 04:00:00	-2.84138	-0.317114	-2.83362	-2.41252	101.255	1.30211	251.418	108.582	1.75924	1.73346
2015-01-13 04:30:00	0.210846	-2.00002	0.23019	-2.45783	101.206	1.30166	262.818	97.1814	1.65645	1.63258
2015-01-13 05:00:00	-0.894581	-0.947949	-0.88346	-2.59484	101.189	1.30209	255.163	104.837	1.54886	1.53109
2015-01-13 05:30:00	-3.09311	-3.14775	-3.05631	-2.81444	101.19	1.30316	250.179	109.822	1.64511	1.62165
2015-01-13 06:00:00	-2.60958	-1.72213	-2.58823	-2.93069	101.186	1.3037	250.782	109.218	1.41586	1.37955
2015-01-13 06:30:00	-3.38289	-2.59325	-3.3515	-3.02283	101.202	1.30433	253.682	106.318	1.82394	1.79297
2015-01-13 07:00:00	-9.67391	-3.71548	-9.62205	-2.99265	101.219	1.30444	254.539	105.461	1.7004	1.67378
2015-01-13 07:30:00	-0.486275	3.98454	-0.51999	-2.98531	101.241	1.30476	267.216	92.7839	1.49375	1.44078
2015-01-13 08:00:00	-8.97665	-3.47399	-8.93295	-2.86084	101.248	1.30425	262.92	97.0802	1.28688	1.24878
2015-01-13 08:30:00	-4.15424	1.486	-4.16063	-2.87762	101.262	1.30452	261.633	98.3672	1.60531	1.57744
2015-01-13 09:00:00	-18.509	-7.77912	-18.4082	-2.82405	101.276	1.3044	259.343	100.657	1.7096	1.67473
2015-01-13 09:30:00	-1.50154	2.22081	-1.51778	-2.75611	101.276	1.30414	258.341	101.659	1.92061	1.88664
2015-01-13 10:00:00	4.43972	14.189	4.32963	-2.7187	101.274	1.30402	254.351	105.649	2.15084	2.11804
2015-01-13 10:30:00	-2.39544	34.0031	-2.64214	-2.52013	101.273	1.30304	257.119	102.881	2.01411	1.95081
2015-01-13 11:00:00	0.0616248	20.134	-0.0982159	-2.24111	101.255	1.30141	245.436	114.564	1.64177	1.59208
2015-01-13 11:30:00	-6.84173	35.4685	-7.13912	-1.65126	101.207	1.2979	252.992	107.008	1.14319	0.984678
2015-01-13 12:00:00	-35.2293	50.293	-35.6228	-1.12663	101.143	1.29455	280.575	79.4247	1.37497	1.18902
2015-01-13 12:30:00	-2.16461	107.672	-3.18489	-0.653843	101.092	1.29161	266.619	93.3809	1.47738	1.33663
2015-01-13 13:00:00	17.7987	96.5137	16.7622	-0.255791	101.036	1.28894	287.157	72.843	1.70039	1.5004
2015-01-13 13:30:00	5.6716	89.8351	4.73451	0.0175154	100.984	1.28699	305.885	54.1148	1.70674	1.55096
2015-01-13 14:00:00	1.59573	153.602	0.0453796	0.56296	100.934	1.28381	298.718	61.2821	1.45593	1.27247
2015-01-13 14:30:00	4.87515	61.7928	4.23485	0.922355	100.906	1.28176	284.581	75.4194	1.83714	1.72593
2015-01-13 15:00:00	-4.46545	20.0578	-4.67154	1.26937	100.901	1.28002	277.59	82.4097	1.97155	1.8364
2015-01-13 15:30:00	9.48191	44.1805	8.97885	1.57254	100.888	1.27842	278.191	81.8088	2.13268	1.98856
2015-01-13 16:00:00	2.84664	42.5201	2.36154	1.64573	100.882	1.27797	276.65	83.3503	2.43146	2.37513
2015-01-13 16:30:00	-2.51532	28.2505	-2.82345	1.59588	100.885	1.27827	278.327	81.6734	2.83238	2.77285
2015-01-13 17:00:00	4.05114	20.1187	3.82437	1.64902	100.906	1.2783	283.271	76.7288	2.52144	2.42653
2015-01-13 17:30:00	3.52705	7.0025	3.44174	1.69594	100.917	1.2782	303.32	56.6803	2.124	2.05471
2015-01-13 18:00:00	9.99237	4.5634	9.92192	1.68977	100.94	1.27853	313.945	46.0547	2.48905	2.41255
2015-01-13 18:30:00	3.42257	-4.76144	3.46601	1.77188	100.959	1.27844	333.532	26.4683	2.88334	2.60962
2015-01-13 19:00:00	5.73038	11.9575	5.59992	1.82365	100.971	1.27839	50.9166	-50.9166	1.96981	1.93048
2015-01-13 19:30:00	21.8341	12.1794	21.6752	1.8284	100.998	1.27872	49.957	-49.957	1.6158	1.55566
2015-01-13 20:00:00	12.6629	6.61336	12.5826	1.81321	101.012	1.27905	48.093	-48.093	1.77351	1.73851
2015-01-13 20:30:00	-40.2298	56.2543	-40.7372	1.47106	101.015	1.28056	138.882	-138.882	0.981184	0.300648
2015-01-13 21:00:00	0.212706	2.41869	0.184497	1.05093	101.025	1.28255	243.402	116.598	0.762063	0.701548
2015-01-13 21:30:00	-0.791282	-3.2113	-0.751746	0.719598	101.042	1.28429	234.511	125.489	0.935242	0.849843
2015-01-13 22:00:00	-0.193738	-1.62758	-0.173887	0.528456	101.06	1.28541	241.263	118.737	0.936098	0.875682
2015-01-13 22:30:00	-2.17182	-10.4504	-2.04288	0.181602	101.066	1.28713	250.994	109.005	1.07338	1.02758
2015-01-13 23:00:00	0.486529	-1.79184	0.50678	-0.0233882	101.067	1.2881	264.288	95.7124	1.75798	1.73469
2015-01-13 23:30:00	-0.477766	-1.24333	-0.462297	-0.310979	101.06	1.28939	259.194	100.806	1.7753	1.75753
2015-01-14	-0.0675498	-1.00524	-0.0559641	-0.625108	101.047	1.29074	248.893	111.107	1.30207	1.26331
2015-01-14 00:30:00	0.116871	-1.80412	0.137199	-0.745797	101.033	1.29113	258.136	101.864	1.64658	1.62573
2015-01-14 01:00:00	-1.3195	0.981182	-1.32809	-0.859581	101.023	1.29152	276.46	83.5397	1.5823	1.55721
2015-01-14 01:30:00	1.82262	-3.8705	1.86568	-0.999557	101.026	1.29218	287.168	72.8325	1.64619	1.61962
2015-01-14 02:00:00	-2.48481	-0.404303	-2.47459	-1.14825	101.044	1.29312	276.224	83.7756	2.16862	2.14783
2015-01-14 02:30:00	6.39867	0.217762	6.38287	-1.38235	101.052	1.29438	273.755	86.2453	2.48224	2.46118
2015-01-14 03:00:00	1.08664	-3.72972	1.12386	-1.50541	101.052	1.29506	266.56	93.4403	2.59913	2.56984
2015-01-14 03:30:00	0.589111	0.220065	0.585676	-1.85208	101.021	1.29632	255.107	104.893	2.58051	2.56486
2015-01-14 04:00:00	-1.69341	-0.155675	-1.68854	-1.92557	100.987	1.29623	251.623	108.377	2.18771	2.14741
2015-01-14 04:30:00	2.75312	2.66312	2.71947	-1.89185	100.969	1.29583	252.51	107.49	2.54166	2.50148
2015-01-14 05:00:00	-0.235433	1.73787	-0.253877	-1.80954	100.952	1.2952	245.299	114.701	1.96693	1.90761
2015-01-14 05:30:00	-1.76796	-2.77046	-1.73472	-1.7758	100.951	1.29503	235.976	124.024	1.55488	1.45356
2015-01-14 06:00:00	3.20869	1.42534	3.18825	-1.85108	100.967	1.29565	250.944	109.056	1.89726	1.85893
2015-01-14 06:30:00	2.31996	-0.926099	2.32485	-1.89553	100.987	1.29617	248.893	111.107	1.76407	1.7241
2015-01-14 07:00:00	-0.234434	-11.6376	-0.119083	-1.6959	100.994	1.29528	248.335	111.665	2.28198	2.23014
2015-01-14 07:30:00	0.481391	0.63928	0.474101	-1.54781	101.009	1.29475	247.215	112.785	1.96065	1.90644
2015-01-14 08:00:00	8.32604	-22.206	8.5311	-1.39684	101.014	1.29411	255.667	104.333	2.24595	2.2052
2015-01-14 08:30:00	-3.45856	-3.5821	-3.41482	-1.08564	101.019	1.29265	251.065	108.935	0.947572	0.871982
2015-01-14 09:00:00	0.743999	-0.686495	0.749803	-0.801122	101.022	1.29133	249.538	110.462	1.12137	1.0645
2015-01-14 09:30:00	11.599	9.34555	11.4717	-0.6137	101.042	1.29063	254.293	105.707	1.25758	1.20027
2015-01-14 10:00:00	9.39591	9.30866	9.27541	-0.676639	101.065	1.29124	237.696	122.304	1.18737	1.10334
2015-01-14 10:30:00	-2.60447	2.31716	-2.62404	-0.847301	101.079	1.29227	224.517	135.483	1.23764	1.14123
2015-01-14 11:00:00	0.725621	29.2137	0.400692	-0.824136	101.076	1.29207	211.084	148.916	1.18405	1.05922
2015-01-14 11:30:00	8.28037	15.9009	8.0405	-0.903239	101.051	1.29189	223.167	136.833	1.40687	1.25699
2015-01-14 12:00:00	8.26485	7.3722	8.13559	-0.823853	100.996	1.29075	240.761	119.239	2.07292	1.9746
2015-01-14 12:30:00	14.1703	10.1599	13.9934	-0.553189	100.951	1.28895	229.504	130.496	1.3764	1.24684
2015-01-14 13:00:00	23.1261	6.88907	22.9828	-0.644999	100.911	1.28895	221.689	138.311	1.95779	1.86086
2015-01-14 13:30:00	23.0262	13.5466	22.7918	-0.586826	100.88	1.28825	216.413	143.587	1.17156	1.04386
2015-01-14 14:00:00	-40.5677	14.0829	-40.6579	-0.631052	100.853	1.28812	239.218	120.782	1.0947	0.950228
2015-01-14 14:30:00	11.1361	9.46575	10.9767	-0.100942	100.828	1.28524	247.837	112.163	1.15329	1.04509
2015-01-14 15:00:00	38.7349	-28.8024	39.0249	0.305709	100.828	1.28338	267.526	92.4742	0.944685	0.830231
2015-01-14 15:30:00	34.8678	-2.09929	34.8162	0.617578	100.828	1.28201	263.907	96.0931	1.16139	1.05927
2015-01-14 16:00:00	4.35604	2.59881	4.31595	0.804779	100.825	1.28114	259.09	100.91	0.887431	0.812029
2015-01-14 16:30:00	0.999741	-7.25485	1.0833	1.00907	100.828	1.28021	290.279	69.7207	0.55601	0.409453
2015-01-14 17:00:00	-1.694	-4.49633	-1.63801	1.23041	100.846	1.27942	277.526	82.4742	0.50598	0.247163
2015-01-14 17:30:00	16.264	9.3793	16.1226	1.42597	100.866	1.27879	269.195	90.8046	0.753502	0.535218
2015-01-14 18:00:00	1.89904	5.545	1.82963	1.49413	100.899	1.27886	103.804	-103.804	0.575871	0.246113
2015-01-14 18:30:00	1.22837	2.72807	1.19246	1.58206	100.915	1.27862	168.286	-168.286	0.602163	0.194923
2015-01-14 19:00:00	6.93211	11.0139	6.78608	1.66575	100.936	1.27851	302.083	57.9168	0.687211	0.535314
2015-01-14 19:30:00	-3.23245	10.1207	-3.34855	1.49933	100.945	1.27938	253.281	106.719	0.895928	0.824352
2015-01-14 20:00:00	16.7409	12.1456	16.5482	1.36205	100.933	1.27983	270.534	89.466	1.32332	1.26608
2015-01-14 20:30:00	-2.54079	5.1598	-2.60225	1.26018	100.941	1.28036	294.997	65.0035	0.645434	0.54039
2015-01-14 21:00:00	4.68546	-0.101737	4.67568	1.29043	100.934	1.28013	269.2	90.8003	0.530292	0.399186
2015-01-14 21:30:00	-3.59386	-6.75761	-3.49852	1.26548	100.923	1.28013	257.033	102.967	0.682234	0.622968
2015-01-14 22:00:00	-0.32358	2.3725	-0.352786	1.04196	100.925	1.28122	258.695	101.305	0.872807	0.770426
2015-01-14 22:30:00	-3.21839	-0.422598	-3.20569	0.807195	100.916	1.28221	248.959	111.041	0.742478	0.685167
2015-01-14 23:00:00	-0.443638	-2.07691	-0.41675	0.671921	100.931	1.28305	187.926	172.074	0.409734	0.361296
2015-01-14 23:30:00	0.0762933	-0.808839	0.085981	0.542943	100.923	1.28357	247.247	112.753	0.340847	0.257728
2015-01-15	-1.20877	-0.687325	-1.19801	0.514722	100.903	1.28349	272.931	87.0687	0.641523	0.613275
2015-01-15 00:30:00	0.792008	1.47147	0.773033	0.396801	100.87	1.28362	271.528	88.4723	0.905745	0.889471
2015-01-15 01:00:00	-0.591115	3.05321	-0.624985	0.235166	100.858	1.28425	276.154	83.8456	0.660777	0.599359
2015-01-15 01:30:00	-0.104257	5.19501	-0.164303	0.24837	100.854	1.28413	96.9476	-96.9476	0.283582	0.211243
2015-01-15 02:00:00	0.52442	-1.33737	0.539132	0.313297	100.86	1.28388	147.434	-147.434	0.799574	0.684949
2015-01-15 02:30:00	1.22968	0.960555	1.21578	0.0437856	100.865	1.28522	172.438	-172.438	0.788887	0.769507
2015-01-15 03:00:00	0.192615	-0.89062	0.202733	-0.0772168	100.846	1.28554	174.881	-174.881	0.352772	0.278617
2015-01-15 03:30:00	-0.867685	0.456085	-0.871186	-0.212316	100.827	1.28595	176.265	-176.265	0.392211	0.379898
2015-01-15 04:00:00	0.357673	-1.26802	0.371358	-0.367221	100.817	1.28658	183.382	176.618	0.47569	0.441392
2015-01-15 04:30:00	2.8533	7.14566	2.76533	-0.530857	100.803	1.28717	148.278	-148.278	0.408392	0.341219
2015-01-15 05:00:00	0.466408	-1.46772	0.482766	-0.32634	100.799	1.28612	112.792	-112.792	0.641076	0.563691
2015-01-15 05:30:00	-2.28476	-1.68734	-2.26122	-0.534532	100.798	1.28714	11.4619	-11.4619	0.492963	0.418291
2015-01-15 06:00:00	-1.55999	3.22761	-1.59167	-0.521595	100.804	1.2872	2.62059	-2.6206	1.02106	0.983961
2015-01-15 06:30:00	-1.11773	-2.21678	-1.0932	-0.784019	100.817	1.28866	347.997	12.003	1.2407	1.21297
2015-01-15 07:00:00	1.31475	2.25519	1.28994	-1.21002	100.835	1.29093	329.654	30.346	1.15943	1.14762
2015-01-15 07:30:00	-5.21425	-9.20041	-5.11994	-1.5849	100.838	1.2928	297.133	62.8671	1.69715	1.67008
2015-01-15 08:00:00	-0.355141	-0.0530945	-0.354102	-1.91709	100.871	1.29485	282.323	77.6766	1.14517	1.08241
2015-01-15 08:30:00	2.93005	-5.3023	2.9716	-1.84878	100.865	1.29446	294.219	65.7815	1.81381	1.79224
2015-01-15 09:00:00	7.34098	4.08866	7.29356	-1.87134	100.871	1.29464	295.423	64.5769	2.19235	2.15496
2015-01-15 09:30:00	-3.05225	-1.22725	-3.03626	-1.79718	100.889	1.2945	278.301	81.6987	1.65501	1.60423
2015-01-15 10:00:00	1.35715	-0.253561	1.35724	-1.80695	100.898	1.29469	274.062	85.9385	2.21688	2.17458
2015-01-15 10:30:00	-5.09058	-14.4091	-4.95973	-1.82029	100.912	1.29495	285.669	74.3311	1.97897	1.87135
2015-01-15 11:00:00	2.74885	9.52592	2.66415	-1.64234	100.921	1.29422	299.369	60.6311	1.25489	1.19747
2015-01-15 11:30:00	-2.34652	5.18027	-2.38915	-1.26372	100.86	1.29159	308.392	51.6077	1.30934	1.25826
2015-01-15 12:00:00	-5.42309	15.0768	-5.5514	-0.705612	100.802	1.28819	290.452	69.5485	0.961534	0.744777
2015-01-15 12:30:00	-4.77683	32.4045	-5.07063	-0.430829	100.766	1.28642	258.299	101.701	1.19477	1.11544
2015-01-15 13:00:00	-0.846812	3.14737	-0.876576	-0.0856796	100.689	1.28374	314.989	45.0111	1.25364	1.13702
2015-01-15 13:30:00	4.96573	15.9458	4.78895	0.271078	100.61	1.28102	331.301	28.6989	1.98101	1.89366
2015-01-15 14:00:00	-13.9507	-17.6498	-13.7221	0.650327	100.57	1.27866	348.902	11.0979	2.08643	1.91989
2015-01-15 14:30:00	-6.36918	-2.45628	-6.32431	0.876503	100.552	1.27728	6.14529	-6.14529	1.87665	1.69237
2015-01-15 15:00:00	7.35261	16.99	7.13639	0.645418	100.568	1.27861	258.948	101.052	1.24591	1.03341
2015-01-15 15:30:00	2.2392	15.9443	2.04787	0.539148	100.543	1.2788	292.08	67.9196	1.24324	1.11831
2015-01-15 16:00:00	3.90504	13.1684	3.73913	0.525163	100.53	1.27868	289.013	70.9871	1.6692	1.51231
2015-01-15 16:30:00	-4.81387	7.21561	-4.89217	0.593659	100.514	1.27812	318.17	41.8303	1.67657	1.59433
2015-01-15 17:00:00	-10.0241	24.5233	-10.3439	1.08774	100.492	1.27538	54.2141	-54.2141	2.09547	1.86921
2015-01-15 17:30:00	8.36335	8.40245	8.22422	1.21394	100.501	1.27491	132.297	-132.297	1.06099	0.877921
2015-01-15 18:00:00	-1.41311	-3.91164	-1.3598	0.752465	100.513	1.27733	198.076	161.924	0.61566	0.453543
2015-01-15 18:30:00	1.20436	-7.74952	1.30027	0.70402	100.523	1.27769	165.464	-165.464	0.635679	0.4288
2015-01-15 19:00:00	1.09745	-5.02404	1.15953	0.825119	100.522	1.2771	188.032	171.968	0.705257	0.411387
2015-01-15 19:30:00	-0.360909	-0.560389	-0.352839	0.636902	100.512	1.27784	156.929	-156.929	0.443309	0.314604
2015-01-15 20:00:00	7.82637	8.28889	7.69219	0.533054	100.498	1.27807	132.131	-132.131	1.29161	1.22016
2015-01-15 20:30:00	8.33057	0.791577	8.29704	0.358626	100.5	1.27885	124.39	-124.39	1.46278	1.34584
2015-01-15 21:00:00	2.35252	22.8724	2.00816	0.138875	100.487	1.2797	100.516	-100.516	1.33732	1.19466
2015-01-15 21:30:00	3.84602	3.57823	3.78299	-0.108024	100.467	1.2806	110.259	-110.259	1.45958	1.36286
2015-01-15 22:00:00	1.49852	4.03229	1.43558	-0.535671	100.465	1.28259	110.514	-110.514	1.5136	1.43876
2015-01-15 22:30:00	1.609	5.65944	1.52266	-0.925543	100.469	1.28449	99.425	-99.425	1.64761	1.56889
2015-01-15 23:00:00	-2.33063	-5.06774	-2.25297	-1.27988	100.488	1.28645	142.372	-142.372	1.82299	1.70831
2015-01-15 23:30:00	2.245	-0.272174	2.24313	-1.31431	100.481	1.28652	100.714	-100.714	1.03375	0.853222
2015-01-16	-1.72371	8.15646	-1.83356	-1.53005	100.44	1.28703	88.2226	-88.2226	1.58441	1.53164
2015-01-16 00:30:00	3.31094	11.6783	3.13878	-1.73036	100.428	1.28783	121.443	-121.443	1.1858	1.06634
2015-01-16 01:00:00	1.78286	1.9186	1.75147	-1.64776	100.426	1.2874	161.791	-161.791	0.701271	0.537299
2015-01-16 01:30:00	-32.6636	93.1142	-33.7437	0.213145	100.402	1.27849	209.163	150.837	1.18382	1.03062
2015-01-16 02:00:00	-10.9126	25.9606	-11.254	-0.929459	100.419	1.2839	165.173	-165.173	0.736981	0.676991
2015-01-16 02:30:00	2.72847	-7.04776	2.81787	-1.17374	100.437	1.28534	178.837	-178.837	0.991078	0.949672
2015-01-16 03:00:00	-11.6823	28.3862	-11.9974	-0.635534	100.44	1.28298	155.971	-155.971	1.76053	0.845841
2015-01-16 03:30:00	-11.9427	11.5648	-12.034	0.26291	100.411	1.27859	70.8488	-70.8488	1.38528	0.977562
2015-01-16 04:00:00	2.92312	-4.14769	2.95233	0.442248	100.395	1.27769	196.879	163.121	1.33221	0.868101
2015-01-16 04:30:00	36.3648	-37.5535	36.4918	1.08827	100.388	1.27494	189.749	170.251	4.11763	3.92929
2015-01-16 05:00:00	4.96825	-12.3028	4.99886	1.05063	100.373	1.27505	192.019	167.981	6.764	6.51408
2015-01-16 05:30:00	1.6043	-12.1545	1.63733	0.89029	100.377	1.27583	197.902	162.098	6.98051	6.76889
2015-01-16 06:00:00	2.26408	-8.20013	2.28721	0.77262	100.385	1.27647	198.538	161.462	6.02322	5.78301
2015-01-16 06:30:00	2.9674	-17.0409	3.01688	0.655604	100.405	1.27727	202.416	157.584	6.43424	6.138
2015-01-16 07:00:00	0.440541	-5.36804	0.458113	0.381097	100.447	1.27906	209.328	150.672	5.71965	5.43816
2015-01-16 07:30:00	2.71885	-4.82575	2.73753	0.161184	100.526	1.281	214.278	145.722	4.97953	4.67258
2015-01-16 08:00:00	10.5829	-6.1556	10.5996	-0.125036	100.58	1.28307	219.438	140.562	5.41856	5.16141
2015-01-16 08:30:00	8.18343	17.0124	8.11919	-0.421746	100.627	1.28511	222.113	137.887	4.95553	4.62938
2015-01-16 09:00:00	5.12023	-3.41422	5.12775	-0.665936	100.667	1.28681	214.051	145.949	5.7701	5.52286
2015-01-16 09:30:00	7.57344	37.9588	7.46353	-0.892899	100.732	1.28874	212.622	147.378	4.60631	4.38344
2015-01-16 10:00:00	3.86389	35.9124	3.77569	-1.0514	100.786	1.29021	207.014	152.986	3.88628	3.58189
2015-01-16 10:30:00	2.99723	77.3567	2.83637	-1.16031	100.828	1.2913	212.798	147.202	5.26893	5.00574
2015-01-16 11:00:00	5.22928	92.5893	5.06621	-1.22256	100.835	1.29171	206.449	153.551	6.89138	6.56497
2015-01-16 11:30:00	1.4751	92.8919	1.31239	-1.22507	100.88	1.29229	210.612	149.388	6.51129	6.24249
2015-01-16 12:00:00	6.3726	92.1509	6.21392	-1.08724	100.851	1.29128	218.798	141.202	7.29399	7.01907
2015-01-16 12:30:00	7.24217	102.535	7.06488	-0.808842	100.836	1.28976	214.5	145.5	6.17927	5.74122
2015-01-16 13:00:00	2.4048	115.77	2.1888	-0.754939	100.835	1.28948	206.764	153.236	6.25752	5.87645
2015-01-16 13:30:00	9.81598	96.341	9.55605	-0.563317	100.85	1.2887	207.153	152.847	6.30107	6.00448
2015-01-16 14:00:00	4.24808	67.9531	4.0809	-0.147762	100.853	1.2868	206.646	153.354	6.13603	5.84679
2015-01-16 14:30:00	-4.85145	64.0288	-4.99725	0.411399	100.867	1.28435	203.959	156.041	5.36786	5.03192
2015-01-16 15:00:00	-1.00299	92.1896	-1.23363	0.651276	100.883	1.28342	203.166	156.834	5.75087	5.40836
2015-01-16 15:30:00	11.6654	63.2426	11.4738	0.819062	100.893	1.28271	199.712	160.288	6.30465	6.05493
2015-01-16 16:00:00	5.01721	61.4349	4.83676	1.08193	100.933	1.282	201.933	158.067	5.42504	5.14065
2015-01-16 16:30:00	-6.21399	30.7483	-6.29925	1.05456	100.973	1.28264	198.588	161.412	6.04155	5.80596
2015-01-16 17:00:00	-3.61586	14.8933	-3.65262	0.924761	101.016	1.28381	201.445	158.555	5.53261	5.30438
2015-01-16 17:30:00	1.30852	5.50682	1.29216	0.689915	101.041	1.28521	204.29	155.71	5.80746	5.60011
2015-01-16 18:00:00	14.7572	-2.90649	14.7579	0.577623	101.091	1.28634	201.703	158.297	6.20101	6.00458
2015-01-16 18:30:00	5.69481	-2.0321	5.69813	0.489892	101.171	1.28777	199.237	160.763	5.41318	5.22188
2015-01-16 19:00:00	4.30807	2.32695	4.29799	0.270789	101.239	1.28966	196.34	163.66	5.30424	5.16479
2015-01-16 19:30:00	1.39197	3.40592	1.38047	-0.0138317	101.279	1.29153	198.002	161.998	5.17774	4.98715
2015-01-16 20:00:00	4.9226	-0.0128173	4.91995	-0.291351	101.332	1.29353	204.847	155.153	4.22201	4.0318
2015-01-16 20:30:00	3.73621	-3.94639	3.74654	-0.417674	101.351	1.29436	215.684	144.316	4.86796	4.68355
2015-01-16 21:00:00	2.49343	16.4882	2.43934	-0.652582	101.386	1.29593	219.033	140.967	3.42559	3.23022
2015-01-16 21:30:00	3.10326	-14.9672	3.14845	-1.05492	101.422	1.29831	228.475	131.525	3.71954	3.56602
2015-01-16 22:00:00	0.5518	-3.70392	0.565248	-1.34421	101.441	1.29987	232.527	127.473	4.97063	4.80144
2015-01-16 22:30:00	2.04473	-5.1738	2.0625	-1.57004	101.443	1.30099	227.19	132.81	5.39905	5.24258
2015-01-16 23:00:00	4.71977	-0.999798	4.72037	-1.78901	101.45	1.30211	223.032	136.968	4.83315	4.66614
2015-01-16 23:30:00	4.57165	0.0170915	4.5683	-1.97367	101.464	1.30317	241.715	118.285	4.42999	4.26502
2015-01-17	2.63457	-4.85507	2.65	-2.24989	101.443	1.30427	230.141	129.859	4.91456	4.75618
2015-01-17 00:30:00	3.39244	-0.893916	3.39339	-2.50123	101.432	1.30535	239.269	120.731	4.79995	4.64842
2015-01-17 01:00:00	2.09531	-13.2649	2.13842	-2.95792	101.398	1.30713	246.135	113.865	5.12654	5.02414
2015-01-17 01:30:00	-0.512838	-12.5801	-0.469301	-3.22669	101.39	1.30831	248.944	111.056	5.49265	5.4101
2015-01-17 02:00:00	1.74863	-11.2223	1.78391	-3.14402	101.397	1.30801	248.167	111.833	5.26338	5.13581
2015-01-17 02:30:00	3.16482	-26.2183	3.24673	-3.19392	101.42	1.30856	262.758	97.2417	5.11253	4.99008
2015-01-17 03:00:00	3.94407	6.00394	3.92361	-4.35391	101.458	1.31472	270.778	89.2221	3.7892	3.67645
2015-01-17 03:30:00	0.951045	-4.85621	0.963315	-4.94422	101.471	1.31782	286.404	73.5959	3.67776	3.51664
2015-01-17 04:00:00	0.527884	-1.90557	0.532363	-5.02171	101.454	1.31799	287.601	72.3987	4.26672	4.13384
2015-01-17 04:30:00	0.0749785	-17.4552	0.117176	-5.05899	101.403	1.31751	277.607	82.3927	5.30836	5.25184
2015-01-17 05:00:00	-0.498751	-20.6311	-0.448587	-5.30248	101.361	1.31816	286.275	73.7249	4.725	4.67075
2015-01-17 05:30:00	0.471093	-6.21174	0.4868	-5.38543	101.362	1.31857	289.706	70.2943	3.35428	3.27974
2015-01-17 06:00:00	2.82628	-13.5961	2.86266	-5.30498	101.368	1.31824	278.699	81.301	2.91852	2.85555
2015-01-17 06:30:00	0.462364	-16.9354	0.511411	-5.26329	101.382	1.3182	283.116	76.8844	2.00873	1.90928
2015-01-17 07:00:00	4.32791	-7.93764	4.34888	-5.23771	101.419	1.31856	285.596	74.4037	2.04069	1.94296
2015-01-17 07:30:00	3.29423	-4.25396	3.30528	-5.26197	101.416	1.31863	307.967	52.0329	1.75571	1.66039
2015-01-17 08:00:00	0.497165	-1.69224	0.502196	-5.18125	101.43	1.31841	299.914	60.0859	1.62523	1.43975
2015-01-17 08:30:00	4.11966	3.39643	4.10708	-5.28852	101.417	1.31878	271.526	88.4745	2.46425	2.42507
2015-01-17 09:00:00	4.52989	16.4877	4.47872	-5.13222	101.405	1.31785	272.623	87.3771	0.927381	0.831489
2015-01-17 09:30:00	3.47096	7.06165	3.44795	-5.09623	101.38	1.31735	304.362	55.638	0.88822	0.772455
2015-01-17 10:00:00	7.10602	53.349	6.95071	-4.68541	101.362	1.31512	323.9	36.1003	0.94269	0.77562
2015-01-17 10:30:00	2.3091	-15.066	2.35725	-4.12528	101.335	1.31198	330.103	29.8967	1.12317	0.924562
2015-01-17 11:00:00	-14.2191	18.5933	-14.2701	-3.11495	101.312	1.30679	70.8697	-70.8697	1.57106	0.976119
2015-01-17 11:30:00	2.12098	130.26	1.57219	-2.65156	101.288	1.30415	105.31	-105.31	3.02373	2.87325
2015-01-17 12:00:00	2.29813	93.0644	1.94944	-2.30761	101.23	1.30178	97.6445	-97.6445	3.08507	2.88044
2015-01-17 12:30:00	6.84797	160.023	6.15731	-1.70207	101.148	1.29778	92.1005	-92.1005	2.53631	2.36926
2015-01-17 13:00:00	22.6759	92.1286	22.2853	-1.28739	101.061	1.2947	105.669	-105.669	2.04279	1.8909
2015-01-17 13:30:00	12.2962	112.281	11.8295	-0.881957	100.983	1.29178	108.194	-108.194	2.4961	2.29011
2015-01-17 14:00:00	12.6379	108.487	12.1941	-0.236654	100.93	1.28806	87.5604	-87.5604	2.82011	2.66551
2015-01-17 14:30:00	-8.02537	105.552	-8.40346	0.395096	100.903	1.28476	92.2319	-92.2319	3.05381	2.904
2015-01-17 15:00:00	6.03989	68.3872	5.79573	0.84038	100.883	1.28243	91.8784	-91.8784	2.92889	2.78457
2015-01-17 15:30:00	-3.95225	38.0091	-4.10794	0.916259	100.856	1.28168	113.287	-113.287	3.84567	3.72389
2015-01-17 16:00:00	-1.89742	86.1268	-2.3021	1.25249	100.808	1.27945	101.632	-101.632	2.73305	2.56328
2015-01-17 16:30:00	6.04917	47.3566	5.81138	1.53225	100.765	1.27759	110.237	-110.237	2.16005	1.93641
2015-01-17 17:00:00	0.273321	18.7194	0.186217	1.64283	100.758	1.27701	95.487	-95.4871	1.93615	1.78393
2015-01-17 17:30:00	-3.19436	15.6778	-3.27022	1.75621	100.752	1.27636	112.739	-112.739	2.84896	2.78021
2015-01-17 18:00:00	13.4675	9.31885	13.4086	1.84759	100.755	1.27598	102.429	-102.429	3.13524	3.05576
2015-01-17 18:30:00	7.33123	3.79633	7.30836	1.92833	100.77	1.27584	105.802	-105.802	2.84047	2.76245
2015-01-17 19:00:00	4.87395	3.15204	4.85569	1.95425	100.775	1.27579	108.839	-108.839	2.23578	2.17232
2015-01-17 19:30:00	7.06484	4.77333	7.03659	1.93389	100.754	1.2756	104.842	-104.842	2.31595	2.23966
2015-01-17 20:00:00	1.38666	0.998466	1.38049	1.9675	100.733	1.27515	106.648	-106.648	2.27608	2.1878
2015-01-17 20:30:00	-19.423	23.3803	-19.5306	1.57892	100.721	1.27677	131.306	-131.306	1.22999	1.07816
2015-01-17 21:00:00	-3.43585	-7.07453	-3.38997	1.215	100.688	1.278	111.021	-111.021	0.816244	0.630613
2015-01-17 21:30:00	-5.54573	-21.8143	-5.40236	0.992237	100.611	1.27803	139.285	-139.285	0.466043	0.164932
2015-01-17 22:00:00	-4.31142	-7.43923	-4.26181	0.349603	100.572	1.28056	215.137	144.863	0.515172	0.435406
2015-01-17 22:30:00	3.71364	8.93685	3.66721	-0.393872	100.576	1.2842	206.663	153.337	0.701461	0.557437
2015-01-17 23:00:00	0.749809	-0.675233	0.75235	-0.560442	100.601	1.28532	198.074	161.926	0.754505	0.65144
2015-01-17 23:30:00	2.38049	0.499801	2.37545	-0.53803	100.568	1.28473	187.632	172.368	0.619875	0.47715
2015-01-18	-3.87876	-1.66545	-3.86631	-0.720098	100.504	1.28479	251.786	108.213	1.33182	1.28459
2015-01-18 00:30:00	0.672283	1.26993	0.665977	-1.19175	100.457	1.28648	239.135	120.865	1.68187	1.61483
2015-01-18 01:00:00	-0.292618	1.12462	-0.297079	-1.34749	100.425	1.28683	232.866	127.134	1.19464	1.1126
2015-01-18 01:30:00	-0.295614	2.88319	-0.307456	-1.52934	100.388	1.28722	224.313	135.687	1.17113	1.08496
2015-01-18 02:00:00	0.238357	-3.68739	0.253384	-1.70959	100.346	1.28755	251.658	108.342	2.26119	2.17074
2015-01-18 02:30:00	1.55847	3.67552	1.54346	-1.62387	100.311	1.28672	250.242	109.758	2.33546	2.29523
2015-01-18 03:00:00	1.30707	-0.943086	1.30974	-1.48002	100.249	1.28524	252.607	107.393	2.48394	2.44822
2015-01-18 03:30:00	-0.991578	-2.10524	-0.982294	-1.27146	100.194	1.28353	262.476	97.524	1.80029	1.71125
2015-01-18 04:00:00	0.717319	7.13957	0.685379	-1.07968	100.117	1.2816	259	101	0.690727	0.61177
2015-01-18 04:30:00	0.796157	0.505345	0.79329	-1.1828	100.041	1.28112	209.708	150.292	0.502122	0.371458
2015-01-18 05:00:00	-0.0211377	1.56656	-0.0277391	-1.21894	99.9965	1.28073	228.51	131.49	0.879602	0.780103
2015-01-18 05:30:00	1.24491	2.846	1.23174	-1.18861	99.9448	1.27992	259.98	100.02	1.2032	1.10343
2015-01-18 06:00:00	-0.0368925	1.77229	-0.0440435	-1.21842	99.9106	1.27965	227.873	132.127	0.479157	0.396616
2015-01-18 06:30:00	-0.597466	0.701007	-0.599887	-0.96116	99.8921	1.2782	171.011	-171.011	0.57401	0.21948
2015-01-18 07:00:00	4.12413	10.6748	4.06848	-0.549951	99.8753	1.27598	93.2586	-93.2586	1.06402	1.03542
2015-01-18 07:30:00	-0.767032	0.692335	-0.769914	-0.344795	99.8538	1.27472	79.4212	-79.4212	0.601969	0.501325
2015-01-18 08:00:00	-1.82134	-3.45146	-1.80171	-0.361632	99.8254	1.27444	348.067	11.9329	0.824046	0.726229
2015-01-18 08:30:00	-0.740861	-0.877871	-0.735321	-0.131676	99.8197	1.27327	83.3343	-83.3343	0.848223	0.66329
2015-01-18 09:00:00	-9.83413	-4.70765	-9.79573	0.166476	99.8232	1.27188	120.621	-120.621	1.81609	1.7769
2015-01-18 09:30:00	-5.09433	6.62427	-5.13363	0.405064	99.816	1.2706	127.022	-127.022	2.96335	2.9055
2015-01-18 10:00:00	5.8029	9.83309	5.73107	0.423293	99.8046	1.27039	128.912	-128.912	3.13387	3.08726
2015-01-18 10:30:00	6.52104	23.2482	6.35154	0.812538	99.7827	1.26828	112.37	-112.37	1.87596	1.80496
2015-01-18 11:00:00	-6.62123	-33.0884	-6.36062	1.82241	99.745	1.26309	164.381	-164.381	2.77287	2.65798
2015-01-18 11:30:00	4.16289	-7.60851	4.21431	3.125	99.7116	1.25671	184.663	175.337	3.00821	2.88106
2015-01-18 12:00:00	0.824119	33.9534	0.549412	4.25136	99.6634	1.25096	185.107	174.893	5.65062	5.42004
2015-01-18 12:30:00	-5.85615	90.6939	-6.57194	4.92334	99.6328	1.24755	188.448	171.552	6.57155	6.2595
2015-01-18 13:00:00	17.8426	134.373	16.7401	4.72912	99.6135	1.24819	179.045	-179.045	9.1386	8.82247
2015-01-18 13:30:00	7.76296	128.825	6.7813	4.10013	99.6059	1.25098	176.225	-176.225	10.9941	10.7653
2015-01-18 14:00:00	67.3356	116.152	66.6854	4.24017	99.6253	1.25079	183.446	176.554	8.05879	7.77907
2015-01-18 14:30:00	4.34441	133.509	3.81481	4.36259	99.6546	1.2507	189.475	170.525	7.41276	7.11875
2015-01-18 15:00:00	-2.32951	61.3062	-2.56435	3.98497	99.6971	1.25296	192.3	167.7	9.12828	8.90053
2015-01-18 15:30:00	12.0778	55.0862	11.8556	4.0072	99.7381	1.25336	195.313	164.687	7.83871	7.50082
2015-01-18 16:00:00	-2.50044	63.2264	-2.774	3.93775	99.7735	1.25408	190.473	169.527	8.86219	8.54729
2015-01-18 16:30:00	1.66786	18.1147	1.57286	3.76925	99.8009	1.25512	194.462	165.538	7.16349	6.83296
2015-01-18 17:00:00	1.16928	9.04283	1.12054	3.75732	99.823	1.25544	192.392	167.608	5.9919	5.7195
2015-01-18 17:30:00	9.61388	4.5138	9.58316	3.77887	99.8547	1.25577	187.57	172.43	5.98893	5.73081
2015-01-18 18:00:00	7.87719	-8.44198	7.9128	3.48799	99.8784	1.25738	197.84	162.16	7.60074	7.31603
2015-01-18 18:30:00	-2.36378	10.6546	-2.41562	3.05914	99.9559	1.26032	199.496	160.504	8.44957	8.11969
2015-01-18 19:00:00	-5.92948	-8.99627	-5.87907	2.76114	100.015	1.26242	197.937	162.063	8.64511	8.35601
2015-01-18 19:30:00	2.28668	20.2263	2.18192	2.57525	100.069	1.26395	193.626	166.374	9.15441	8.88436
2015-01-18 20:00:00	5.48602	-7.05601	5.51518	2.47664	100.125	1.26514	192.541	167.459	7.07569	6.86633
2015-01-18 20:30:00	4.65456	-12.6158	4.70884	2.43493	100.181	1.26605	203.495	156.505	4.38999	4.16002
2015-01-18 21:00:00	3.92135	-4.62245	3.94042	2.37026	100.186	1.26638	212.755	147.245	3.09127	2.87205
2015-01-18 21:30:00	1.66648	-9.59664	1.71576	2.33607	100.187	1.26652	203.557	156.443	3.92986	3.76253
2015-01-18 22:00:00	1.18783	-13.76	1.26158	2.356	100.2	1.26658	208.014	151.986	4.37326	4.10233
2015-01-18 22:30:00	2.84553	-13.3306	2.9163	2.39618	100.204	1.26644	217.903	142.097	4.69138	4.49296
2015-01-18 23:00:00	7.38911	-24.2843	7.52333	2.49068	100.201	1.26593	210.784	149.216	5.16389	4.85768
2015-01-18 23:30:00	11.0222	-10.6992	11.0759	2.54187	100.234	1.26609	210.074	149.926	5.33059	5.04259
2015-01-19	-7.64923	-24.7784	-7.49569	2.57457	100.292	1.26669	204.453	155.547	4.5149	4.29585
2015-01-19 00:30:00	7.64991	-19.6791	7.74766	2.62364	100.317	1.26683	194.911	165.089	4.56182	4.36776
2015-01-19 01:00:00	-7.42844	-13.9213	-7.33772	2.69807	100.307	1.26632	197.422	162.578	5.11333	4.91245
2015-01-19 01:30:00	1.43542	-16.9578	1.54132	2.7353	100.341	1.26653	193.079	166.921	5.10979	4.9437
2015-01-19 02:00:00	4.71944	-18.8051	4.83585	2.73633	100.361	1.26676	194.882	165.118	4.77847	4.61144
2015-01-19 02:30:00	4.1928	-15.7964	4.29376	2.60582	100.396	1.2678	206.767	153.233	2.85987	2.607
2015-01-19 03:00:00	-0.174111	-4.53195	-0.143087	2.29523	100.439	1.26976	223.016	136.984	1.31917	1.17141
2015-01-19 03:30:00	0.66246	-2.51279	0.677813	2.11248	100.456	1.27084	243.658	116.342	2.38821	2.33733
2015-01-19 04:00:00	-3.48058	-5.38993	-3.44312	2.08501	100.462	1.27107	242.419	117.581	1.25492	1.14222
2015-01-19 04:30:00	7.31625	-2.51685	7.3254	1.87111	100.458	1.27188	269.789	90.2106	0.562697	0.154836
2015-01-19 05:00:00	-5.34033	-5.19954	-5.29792	2.07146	100.466	1.27112	187.306	172.694	1.41199	1.30058
2015-01-19 05:30:00	0.0767972	-7.92261	0.126555	2.14919	100.475	1.27094	192.543	167.457	2.08068	2.02532
2015-01-19 06:00:00	2.18911	53.5689	1.8324	1.22286	100.502	1.27554	317.588	42.4124	2.37364	1.85078
2015-01-19 06:30:00	8.48693	-3.77648	8.50069	0.882904	100.539	1.27763	304.487	55.5134	2.66848	2.59452
2015-01-19 07:00:00	-0.671385	-9.52445	-0.6085	0.351228	100.565	1.28042	322.71	37.2901	2.37774	2.32502
2015-01-19 07:30:00	-5.31516	39.1991	-5.59038	-0.846957	100.604	1.2865	306.645	53.3548	2.71161	2.66315
2015-01-19 08:00:00	8.1575	-16.7319	8.26111	-1.52473	100.65	1.29033	318.018	41.9819	2.45344	2.42364
2015-01-19 08:30:00	3.63638	-42.1506	3.89045	-1.86445	100.672	1.29229	314.274	45.726	1.71732	1.67807
2015-01-19 09:00:00	-5.65706	-11.9521	-5.57172	-1.95441	100.681	1.29279	306.995	53.0052	1.37902	1.30468
2015-01-19 09:30:00	3.30394	12.5365	3.2266	-1.80142	100.684	1.29216	260.663	99.337	1.65622	1.62234
2015-01-19 10:00:00	6.21363	5.5079	6.17407	-1.59594	100.695	1.29131	269.467	90.5328	1.53468	1.48304
2015-01-19 10:30:00	2.03327	124.728	1.2572	-0.800695	100.698	1.28756	278.483	81.5169	0.887081	0.778092
2015-01-19 11:00:00	-34.9699	79.029	-35.4147	-0.141171	100.695	1.28442	297.802	62.1983	1.30135	1.14732
2015-01-19 11:30:00	10.0281	30.228	9.83948	0.814588	100.658	1.27949	300.622	59.3783	0.671127	0.167992
2015-01-19 12:00:00	-7.49301	209.688	-8.81497	1.74737	100.593	1.27428	357.21	2.79036	0.52731	0.118199
2015-01-19 12:30:00	9.05789	70.2134	8.55048	2.37376	100.531	1.27053	73.7151	-73.7151	2.62615	2.45347
2015-01-19 13:00:00	57.0041	165.651	55.8564	2.99155	100.479	1.26709	76.0016	-76.0016	3.61764	3.44154
2015-01-19 13:30:00	4.36222	118.793	3.70751	3.35133	100.439	1.26502	75.9988	-75.9988	3.05662	2.85869
2015-01-19 14:00:00	-9.05748	175.914	-10.0064	3.75828	100.378	1.2624	75.271	-75.271	3.13295	2.92545
2015-01-19 14:30:00	2.27544	95.6205	1.63648	4.01439	100.331	1.26053	67.9518	-67.9518	3.31226	3.01295
2015-01-19 15:00:00	0.758351	115.311	0.0283651	4.26908	100.305	1.25908	51.0732	-51.0732	3.77873	3.60303
2015-01-19 15:30:00	24.2833	86.7556	23.7483	4.51599	100.303	1.25798	78.0606	-78.0607	3.35676	3.15368
2015-01-19 16:00:00	27.7773	41.9852	27.483	4.78999	100.293	1.25658	62.0945	-62.0945	3.50076	3.28321
2015-01-19 16:30:00	18.3	87.6696	17.6986	5.06405	100.286	1.25522	61.1497	-61.1497	2.98911	2.79054
2015-01-19 17:00:00	1.45885	8.73599	1.39908	5.33061	100.281	1.25395	55.6805	-55.6805	2.6496	2.49735
2015-01-19 17:30:00	24.9372	8.83195	24.8519	5.42924	100.287	1.25361	55.5148	-55.5148	3.1317	3.00718
2015-01-19 18:00:00	0.0917129	7.98318	0.0401744	5.39493	100.29	1.25378	52.6971	-52.6971	2.97948	2.9081
2015-01-19 18:30:00	-14.4414	2.07735	-14.4374	5.24918	100.299	1.25452	26.393	-26.393	2.36021	2.13027
2015-01-19 19:00:00	10.1577	-13.9232	10.249	4.79435	100.305	1.25659	358.99	1.0095	2.75913	2.71388
2015-01-19 19:30:00	2.02673	15.0547	1.90276	4.41427	100.32	1.25846	357.475	2.52502	3.21944	3.15776
2015-01-19 20:00:00	4.79259	10.2474	4.70257	3.79853	100.327	1.26134	356.089	3.91143	3.76733	3.70214
2015-01-19 20:30:00	-5.79642	19.0945	-5.95577	3.11502	100.326	1.26439	358.993	1.0068	4.6945	4.61864
2015-01-19 21:00:00	8.69207	8.42913	8.58923	2.56025	100.337	1.26695	4.57621	-4.5762	3.31673	3.22158
2015-01-19 21:30:00	6.24546	-4.17866	6.27698	1.85528	100.36	1.27048	6.22158	-6.22159	3.32411	3.24642
2015-01-19 22:00:00	11.3298	4.4207	11.2626	1.51601	100.38	1.2723	13.873	-13.873	2.65747	2.59104
2015-01-19 22:30:00	-5.27826	5.7509	-5.32773	1.25405	100.398	1.27375	3.76864	-3.76865	1.68487	1.61552
2015-01-19 23:00:00	2.69071	-2.78267	2.7154	0.889025	100.412	1.27559	342.171	17.8287	1.70443	1.66009
2015-01-19 23:30:00	1.88437	-2.93827	1.91165	0.669513	100.414	1.27666	347.06	12.9404	1.77	1.73227
2015-01-20	11.5142	-11.1576	11.6175	0.24988	100.407	1.27845	312.555	47.4448	2.07142	2.03758
2015-01-20 00:30:00	0.908762	-7.38584	0.996811	-0.397987	100.404	1.28138	325.678	34.3224	3.06134	3.04268
2015-01-20 01:00:00	6.25067	-3.66866	6.28327	-1.07512	100.394	1.28439	321.348	38.6516	3.47304	3.45344
2015-01-20 01:30:00	-20.1407	5.10552	-20.1623	-1.3463	100.386	1.28541	318.289	41.7105	3.768	3.73999
2015-01-20 02:00:00	0.44525	-2.90327	0.490871	-1.40929	100.376	1.28544	324.923	35.0765	3.0516	3.00723
2015-01-20 02:30:00	-0.528049	-3.92451	-0.463696	-1.38515	100.379	1.28538	319.384	40.6164	3.23875	3.19593
2015-01-20 03:00:00	0.467531	-3.15643	0.515607	-1.283	100.375	1.28489	294.436	65.5642	2.06801	2.00068
2015-01-20 03:30:00	-2.79811	-0.137073	-2.78864	-1.38596	100.34	1.28499	272.086	87.9137	2.09781	2.06042
2015-01-20 04:00:00	-1.0241	-2.04438	-0.991991	-1.50666	100.303	1.28513	258.769	101.231	1.89646	1.84992
2015-01-20 04:30:00	-6.88481	-4.53955	-6.80637	-1.60288	100.284	1.28541	247.017	112.983	1.69816	1.64073
2015-01-20 05:00:00	-5.66779	-6.05494	-5.57438	-1.7126	100.264	1.28571	249.768	110.232	1.81907	1.77
2015-01-20 05:30:00	-5.38281	-7.3374	-5.27661	-1.84299	100.246	1.28613	246.865	113.135	1.57217	1.51327
2015-01-20 06:00:00	0.428393	-5.17739	0.492434	-1.82621	100.234	1.28593	233.893	126.107	1.21915	1.13261
2015-01-20 06:30:00	-9.53418	-16.4465	-9.30844	-1.76713	100.223	1.28551	236.696	123.304	1.37019	1.27866
2015-01-20 07:00:00	-1.67927	-4.68287	-1.61689	-1.66517	100.218	1.28495	231.992	128.008	1.74888	1.65165
2015-01-20 07:30:00	3.42562	11.275	3.28247	-1.81562	100.227	1.28582	216.64	143.36	1.54411	1.46066
2015-01-20 08:00:00	-0.18383	2.76851	-0.21832	-1.76717	100.227	1.28554	206.876	153.124	1.14916	1.0908
2015-01-20 08:30:00	-0.807189	-3.48407	-0.759571	-1.5696	100.216	1.28442	212.632	147.368	0.942302	0.871634
2015-01-20 09:00:00	0.428105	5.13363	0.360006	-1.84346	100.222	1.2858	217.535	142.465	1.74701	1.64452
2015-01-20 09:30:00	3.05189	18.2725	2.80149	-1.77313	100.249	1.28579	220.835	139.165	1.68821	1.58069
2015-01-20 10:00:00	-2.27432	13.2593	-2.44516	-1.43076	100.254	1.28423	225.521	134.479	1.2518	1.12996
2015-01-20 10:30:00	1.23461	-0.272138	1.23527	-1.06635	100.245	1.2824	225.569	134.431	1.58028	1.42532
2015-01-20 11:00:00	-1.19264	13.6118	-1.3656	-0.40118	100.235	1.27917	237.299	122.701	1.33134	1.18922
2015-01-20 11:30:00	-31.3387	-1.18915	-31.2521	-0.0228698	100.198	1.27696	255.396	104.604	1.66677	1.55831
2015-01-20 12:00:00	-30.5314	15.2789	-30.6625	0.344174	100.137	1.2744	247.661	112.339	2.21273	2.12686
2015-01-20 12:30:00	-30.6964	78.4786	-31.666	0.644997	100.081	1.27229	253.804	106.196	2.40762	2.31759
2015-01-20 13:00:00	-8.14261	54.2694	-8.86118	0.980543	100.003	1.26972	255.799	104.201	2.46142	2.37878
2015-01-20 13:30:00	-0.350687	31.2723	-0.770123	1.3451	99.9462	1.26732	257.098	102.902	2.75069	2.67753
2015-01-20 14:00:00	0.29421	78.2009	-0.786	1.99166	99.9081	1.26383	274.841	85.159	2.04596	1.86316
2015-01-20 14:30:00	3.54799	126.907	1.78912	2.59123	99.8719	1.26063	293.738	66.2615	1.80613	1.55633
2015-01-20 15:00:00	7.64236	137.218	5.73236	2.90531	99.8812	1.25931	288.07	71.9295	1.86138	1.63233
2015-01-20 15:30:00	4.98658	66.636	4.07836	3.17965	99.8763	1.25802	302.05	57.9503	2.39423	2.24403
2015-01-20 16:00:00	1.83397	56.931	1.079	3.3794	99.8889	1.25729	298.322	61.6777	2.46013	2.34358
2015-01-20 16:30:00	14.1768	16.1938	13.9373	3.6728	99.9142	1.25632	312.317	47.6834	1.77227	1.64594
2015-01-20 17:00:00	4.05037	2.04399	4.01554	3.81947	99.9329	1.25591	300.617	59.383	0.996148	0.874327
2015-01-20 17:30:00	2.53368	-2.58755	2.56004	3.83324	99.9918	1.25659	252.193	107.807	0.944873	0.851848
2015-01-20 18:00:00	5.20174	1.58236	5.16858	3.82376	100.047	1.25727	263.634	96.3658	0.983109	0.894129
2015-01-20 18:30:00	5.95862	11.0795	5.8058	3.80139	100.092	1.25799	275.303	84.6965	1.64607	1.60603
2015-01-20 19:00:00	5.15481	4.34359	5.08831	3.72035	100.136	1.2589	278.85	81.1497	1.8268	1.78976
2015-01-20 19:30:00	2.57063	-0.21415	2.56755	3.66143	100.173	1.25969	270.527	89.473	1.84859	1.80092
2015-01-20 20:00:00	2.1239	0.297558	2.11574	3.56982	100.195	1.26039	252.15	107.85	1.24761	1.17012
2015-01-20 20:30:00	-2.82192	13.9636	-2.97664	3.70569	100.225	1.26018	211.987	148.013	0.936702	0.795236
2015-01-20 21:00:00	3.7105	-3.78228	3.74346	4.2559	100.262	1.25823	205.246	154.754	1.53944	1.43936
2015-01-20 21:30:00	4.71251	-6.32744	4.77271	4.14986	100.285	1.25896	205.792	154.208	1.68887	1.60158
2015-01-20 22:00:00	8.30621	-12.2949	8.41837	4.17538	100.304	1.25914	224.172	135.828	2.11679	2.00242
2015-01-20 22:30:00	12.6728	-6.18338	12.7137	4.08388	100.347	1.26007	217.708	142.292	1.82989	1.72914
2015-01-20 23:00:00	6.93172	-30.3178	7.2188	4.25856	100.366	1.25958	212.746	147.254	3.47635	3.34981
2015-01-20 23:30:00	-0.577975	-24.4524	-0.35073	4.07303	100.373	1.26057	210.995	149.005	3.70063	3.55303
2015-01-21	4.86618	-8.0901	4.92937	3.95614	100.387	1.26132	216.93	143.07	4.1636	4.0164
2015-01-21 00:30:00	8.70343	-13.4249	8.80794	3.61814	100.415	1.2632	219.061	140.939	4.125	3.94399
2015-01-21 01:00:00	6.67896	-10.43	6.76264	3.29208	100.451	1.26513	216.048	143.952	3.98347	3.79539
2015-01-21 01:30:00	2.91196	-15.359	3.04504	3.04852	100.467	1.26646	217.237	142.763	5.00315	4.8278
2015-01-21 02:00:00	2.38887	-11.1615	2.48483	2.83905	100.491	1.26772	222.13	137.87	4.78846	4.63241
2015-01-21 02:30:00	4.0178	-16.7509	4.16377	2.69203	100.516	1.2687	218.33	141.67	4.46791	4.31098
2015-01-21 03:00:00	2.32351	-5.4623	2.36991	2.41674	100.544	1.27031	219.586	140.414	3.61913	3.46547
2015-01-21 03:30:00	0.326456	-5.22697	0.377496	2.05753	100.568	1.27222	224.626	135.374	4.35473	4.21215
2015-01-21 04:00:00	3.46249	-9.97836	3.55292	1.7587	100.564	1.27356	232.065	127.936	5.12614	4.97156
2015-01-21 04:30:00	5.7581	-8.19933	5.82282	1.58418	100.563	1.27442	227.558	132.442	5.19563	5.0305
2015-01-21 05:00:00	3.84303	-7.05202	3.90095	1.40259	100.573	1.27538	226.337	133.663	5.45243	5.28717
2015-01-21 05:30:00	2.39053	-10.565	2.48336	1.14478	100.606	1.277	224.876	135.124	5.30789	5.13139
2015-01-21 06:00:00	4.50468	-2.17917	4.51711	0.823906	100.647	1.27901	220.954	139.046	4.57694	4.3624
2015-01-21 06:30:00	-1.0996	3.39891	-1.12786	0.531825	100.701	1.28109	222.662	137.338	4.58126	4.37783
2015-01-21 07:00:00	6.40277	-5.80338	6.44425	0.285929	100.734	1.28267	222.954	137.046	5.27341	5.10775
2015-01-21 07:30:00	2.28501	-2.9724	2.30721	0.142575	100.779	1.28394	223.703	136.297	4.94605	4.7972
2015-01-21 08:00:00	5.62064	-7.10811	5.67388	0.0154119	100.813	1.28496	223.78	136.22	4.82595	4.69348
2015-01-21 08:30:00	0.722321	-2.62992	0.743149	-0.157371	100.834	1.28607	224.899	135.101	5.34113	5.20311
2015-01-21 09:00:00	7.12516	11.8034	7.02508	-0.177308	100.845	1.28637	223.413	136.587	5.66691	5.47684
2015-01-21 09:30:00	6.81945	31.9988	6.56535	-0.0575327	100.853	1.28591	222.491	137.509	5.17977	4.99569
2015-01-21 10:00:00	17.4407	74.0686	16.8331	0.214338	100.866	1.28477	220.889	139.111	4.00565	3.77182
2015-01-21 10:30:00	4.93034	50.2741	4.57115	0.564648	100.885	1.28344	221.075	138.925	3.18357	2.86966
2015-01-21 11:00:00	4.8025	88.91	4.14741	0.741172	100.89	1.28265	221.642	138.358	3.91343	3.59876
2015-01-21 11:30:00	-6.06287	94.3062	-6.6775	1.19957	100.876	1.2804	219.986	140.014	4.20704	3.96215
2015-01-21 12:00:00	-0.348311	81.621	-0.852425	1.61925	100.854	1.2782	216.737	143.263	3.55876	3.25622
2015-01-21 12:30:00	4.21	82.1803	3.69329	1.96453	100.808	1.27601	208.78	151.22	3.94532	3.65935
2015-01-21 13:00:00	-2.38744	102.804	-2.98946	2.38628	100.752	1.27338	217.722	142.278	3.76578	3.45415
2015-01-21 13:30:00	14.1355	95.4143	13.602	2.8258	100.704	1.27078	209.264	150.736	2.91917	2.68162
2015-01-21 14:00:00	39.9851	114.028	39.3726	3.21178	100.671	1.26862	215.572	144.428	2.83966	2.51525
2015-01-21 14:30:00	2.20005	73.9094	1.8237	3.49058	100.654	1.26713	208.008	151.992	2.80856	2.55809
2015-01-21 15:00:00	22.9489	71.0017	22.5973	3.82863	100.647	1.26553	224.788	135.212	3.00687	2.69882
2015-01-21 15:30:00	1.15216	110.837	0.636184	4.21034	100.644	1.26375	216.491	143.509	2.13959	1.87366
2015-01-21 16:00:00	43.554	125.446	42.9509	4.36675	100.642	1.26302	216.868	143.132	2.49773	2.21641
2015-01-21 16:30:00	-2.44681	48.8831	-2.6803	4.53803	100.652	1.26234	208.945	151.055	2.40033	2.15617
2015-01-21 17:00:00	0.251654	9.12277	0.208548	4.539	100.657	1.26241	230.918	129.082	3.22524	3.02441
2015-01-21 17:30:00	5.75953	4.09033	5.73499	4.56076	100.684	1.26265	227.608	132.392	3.10765	2.96381
2015-01-21 18:00:00	6.11719	-0.0502237	6.1114	4.42947	100.704	1.26344	213.477	146.523	2.34772	2.2376
2015-01-21 18:30:00	6.72822	-0.385186	6.72396	4.19753	100.717	1.2647	206.676	153.324	2.35778	2.2396
2015-01-21 19:00:00	3.51006	-7.90633	3.54817	4.03073	100.724	1.26552	204.982	155.018	2.68105	2.5829
2015-01-21 19:30:00	1.26995	-4.86717	1.29316	4.03469	100.733	1.26564	206.696	153.304	2.45194	2.36837
2015-01-21 20:00:00	6.47162	-6.30281	6.49922	3.81488	100.748	1.26679	200.397	159.603	1.93018	1.87084
2015-01-21 20:30:00	0.533742	-4.96282	0.562804	3.56406	100.756	1.26799	191.075	168.925	1.71803	1.64825
2015-01-21 21:00:00	-2.7182	-0.550737	-2.71212	3.57	100.756	1.26798	170.146	-170.146	2.88704	2.82895
2015-01-21 21:30:00	2.52697	1.90204	2.51326	3.61178	100.763	1.26788	166.995	-166.995	2.69701	2.67461
2015-01-21 22:00:00	6.86637	-2.29504	6.87259	3.46554	100.761	1.2685	165.682	-165.682	1.6793	1.64056
2015-01-21 22:30:00	1.04896	-0.237597	1.04923	3.37721	100.763	1.26893	137.599	-137.599	2.25902	2.20071
2015-01-21 23:00:00	14.0655	-0.622801	14.0544	3.24068	100.762	1.26957	147.111	-147.111	2.15638	2.11738
2015-01-21 23:30:00	9.99768	-3.07403	10.0042	3.1162	100.76	1.27016	121.088	-121.088	2.06972	1.99402
2015-01-22	2.72817	-0.0155733	2.72553	3.03267	100.75	1.2704	126.259	-126.259	1.16977	1.12467
2015-01-22 00:30:00	0.685274	-0.00367404	0.684545	2.85586	100.734	1.27098	323.282	36.7182	0.665555	0.569839
2015-01-22 01:00:00	5.14072	-7.15585	5.178	2.72084	100.721	1.27142	57.0423	-57.0423	0.633372	0.390297
2015-01-22 01:30:00	-6.5674	37.0807	-6.85896	1.49208	100.699	1.27666	266.715	93.2852	2.02256	1.97065
2015-01-22 02:00:00	-6.99382	-3.29355	-6.96114	0.999984	100.696	1.27899	278.772	81.2277	2.39852	2.38288
2015-01-22 02:30:00	3.31357	1.32349	3.30342	0.398381	100.688	1.28187	282.235	77.7654	3.75994	3.72145
2015-01-22 03:00:00	8.42732	-6.31913	8.45086	-0.064444	100.691	1.28411	282.956	77.0442	3.20159	3.14173
2015-01-22 03:30:00	3.55456	14.6393	3.47923	-0.740692	100.683	1.2872	271.775	88.2254	2.96316	2.89475
2015-01-22 04:00:00	3.68234	-11.841	3.7413	-1.05829	100.668	1.28848	251.4	108.6	2.63368	2.59216
2015-01-22 04:30:00	0.36815	6.14668	0.333394	-1.5564	100.643	1.29049	243.244	116.756	2.38446	2.28384
2015-01-22 05:00:00	8.98237	-7.3237	9.01474	-1.87464	100.645	1.29203	277.64	82.3595	2.3445	2.3022
2015-01-22 05:30:00	6.56926	-8.73268	6.61089	-1.97111	100.618	1.29216	270.105	89.8954	4.00729	3.96935
2015-01-22 06:00:00	4.33674	-15.5582	4.42279	-2.36288	100.607	1.29386	263.744	96.2563	2.08075	2.03932
2015-01-22 06:30:00	0.950558	-10.8119	1.01077	-2.50766	100.602	1.29451	260.222	99.7781	2.88751	2.86635
2015-01-22 07:00:00	1.79501	-4.02388	1.81571	-2.7909	100.615	1.29604	260.444	99.5563	2.56478	2.53395
2015-01-22 07:30:00	6.56191	-10.2347	6.61565	-3.02561	100.623	1.29723	273.286	86.7135	1.78884	1.71728
2015-01-22 08:00:00	1.19255	-1.94557	1.2029	-3.16815	100.62	1.29787	262.148	97.8524	1.37203	1.33911
2015-01-22 08:30:00	1.52093	0.318262	1.51723	-3.52702	100.626	1.29965	270.603	89.3974	1.01551	0.920242
2015-01-22 09:00:00	4.09935	-3.87691	4.11869	-3.72155	100.593	1.30018	277.27	82.7304	1.58277	1.5063
2015-01-22 09:30:00	1.36682	16.7178	1.25344	-3.42127	100.581	1.29852	258.934	101.066	1.3874	1.30989
2015-01-22 10:00:00	5.00771	18.3347	4.8611	-3.05515	100.566	1.29649	274.78	85.2198	1.16752	1.07269
2015-01-22 10:30:00	13.2573	49.0108	12.846	-2.48653	100.564	1.29371	266.782	93.2183	1.31888	1.24581
2015-01-22 11:00:00	14.5574	34.9182	14.2527	-1.81505	100.541	1.2902	287.277	72.7229	1.57172	1.42985
2015-01-22 11:30:00	0.488916	62.5487	-0.00378979	-1.20969	100.508	1.28693	266.404	93.596	1.22426	1.11717
2015-01-22 12:00:00	-43.6299	175.151	-44.8468	-0.309743	100.448	1.28196	276.238	83.7615	1.191	1.00697
2015-01-22 12:30:00	7.19384	-2.27195	7.20119	0.315032	100.385	1.2782	308.252	51.7479	1.22717	1.06547
2015-01-22 13:00:00	-13.8636	70.9275	-14.4148	1.1452	100.318	1.27344	316.29	43.7098	1.34115	1.14969
2015-01-22 13:30:00	3.49005e+17	2.60311e+16	-7.03212e+20	2.09768	100.248	259921100000000	339.435	20.5649	1.55216	1.14903
2015-01-22 14:00:00	36.2938	11.1171	36.252	3.02639	100.196	1.26372	11.2068	-11.2068	1.8986	1.60102
2015-01-22 14:30:00	16.3022	78.9561	16.1532	3.67033	100.138	1.2601	76.6573	-76.6573	2.36424	2.13552
2015-01-22 15:00:00	20.6807	135.11	20.4221	3.91298	100.121	1.25877	82.8536	-82.8536	3.13022	3.00992
2015-01-22 15:30:00	11.4522	107.325	11.2735	4.15997	100.106	1.25749	90.2992	-90.2992	3.2641	3.06633
2015-01-22 16:00:00	2.5982	69.6409	2.47693	4.269	100.097	1.25686	93.7417	-93.7417	3.6702	3.56851
2015-01-22 16:30:00	-4.23513	11.2828	-4.25668	4.45485	100.08	1.25579	94.4361	-94.4361	2.97596	2.81164
2015-01-22 17:00:00	6.21067	14.193	6.16603	4.57209	100.058	1.25491	91.6739	-91.6739	3.84669	3.75986
2015-01-22 17:30:00	16.7196	25.9654	16.6071	4.45666	100.074	1.25554	103.141	-103.141	2.9751	2.81488
2015-01-22 18:00:00	6.0427	13.3803	5.97279	4.35581	100.086	1.25607	99.6655	-99.6655	3.27111	3.04274
2015-01-22 18:30:00	11.453	11.5115	11.3782	4.23165	100.056	1.2562	73.4357	-73.4357	3.42337	3.30694
2015-01-22 19:00:00	-22.5301	16.0628	-22.6074	3.9984	100.079	1.25745	90.4381	-90.4381	4.8625	4.73475
2015-01-22 19:30:00	0.774997	-2.60075	0.792748	3.85096	100.075	1.25801	88.5793	-88.5793	4.40177	4.32001
2015-01-22 20:00:00	8.08466	0.122552	8.07299	3.7844	100.076	1.25832	89.6183	-89.6183	4.46683	4.39921
2015-01-22 20:30:00	9.7502	4.0945	9.70433	3.65705	100.069	1.25877	88.5299	-88.53	3.46493	3.38218
2015-01-22 21:00:00	-2.71064	-6.92006	-2.65705	3.50242	100.059	1.25939	91.0666	-91.0666	3.38929	3.30383
2015-01-22 21:30:00	12.1462	-9.2472	12.1985	3.3524	100.058	1.26005	93.8815	-93.8815	2.75045	2.64224
2015-01-22 22:00:00	9.44092	-33.6876	9.69189	3.05385	100.049	1.26126	86.2989	-86.2989	1.66973	1.5623
2015-01-22 22:30:00	7.61435	9.71799	7.54401	1.84596	100.029	1.26669	218.238	141.762	0.485006	0.276332
2015-01-22 23:00:00	-1.29719	-7.44434	-1.25472	1.32136	100.026	1.26914	204.352	155.648	0.63323	0.582924
2015-01-22 23:30:00	-0.696379	-4.40977	-0.671208	1.2217	99.9997	1.26926	196.424	163.576	0.700706	0.668355
2015-01-23	1.82014	2.73348	1.80315	0.543833	99.9836	1.2722	209.586	150.414	0.812209	0.743139
2015-01-23 00:30:00	-0.820595	-4.24234	-0.796654	-0.172022	99.9759	1.27545	212.988	147.012	1.06567	0.970271
2015-01-23 01:00:00	-0.344023	-2.92365	-0.325605	-0.422569	99.959	1.27634	228.365	131.635	1.08554	0.988489
2015-01-23 01:30:00	-1.3157	-1.17632	-1.30707	-0.618509	99.9391	1.27701	211.736	148.264	1.06266	0.977011
2015-01-23 02:00:00	0.573193	-0.859733	0.577589	-0.789136	99.9342	1.27778	229.027	130.973	1.3656	1.25548
2015-01-23 02:30:00	2.42105	-4.35243	2.44275	-0.937571	99.932	1.27847	239.453	120.547	2.11529	2.04661
2015-01-23 03:00:00	3.27097	-2.92646	3.28313	-1.07252	99.9154	1.27892	238.921	121.079	2.16893	2.09586
2015-01-23 03:30:00	1.1518	-1.55713	1.15863	-1.08795	99.906	1.27888	243.863	116.137	2.23592	2.18164
2015-01-23 04:00:00	2.38809	-8.29846	2.42451	-0.999122	99.8757	1.27812	237.996	122.004	1.80323	1.72505
2015-01-23 04:30:00	3.14033	-1.14685	3.14298	-1.04501	99.8439	1.27793	237.899	122.101	1.63368	1.54113
2015-01-23 05:00:00	-0.575229	-5.49151	-0.550195	-1.25494	99.8188	1.2786	243.617	116.383	1.94971	1.88371
2015-01-23 05:30:00	0.198085	-6.45604	0.225682	-1.57004	99.8085	1.27997	249.644	110.356	2.496	2.46261
2015-01-23 06:00:00	-0.39694	-0.672241	-0.3938	-1.59202	99.8018	1.28	256.861	103.139	2.92447	2.90887
2015-01-23 06:30:00	-0.842639	0.881723	-0.845485	-1.45768	99.8011	1.27938	255.527	104.473	2.75834	2.74047
2015-01-23 07:00:00	1.17236	5.12628	1.15118	-1.41832	99.8002	1.27918	256.144	103.856	2.28489	2.25754
2015-01-23 07:30:00	-2.41248	-4.83915	-2.39083	-1.47606	99.818	1.27967	252.285	107.715	1.89476	1.85778
2015-01-23 08:00:00	1.08486	-3.57422	1.09988	-1.60832	99.8252	1.28035	279.125	80.8749	1.58479	1.5412
2015-01-23 08:30:00	0.985962	-3.53278	1.00159	-1.67526	99.8477	1.28094	264.823	95.1767	1.16151	1.1188
2015-01-23 09:00:00	6.68257	-8.82409	6.71755	-1.6863	99.8418	1.28092	269.075	90.9251	1.3827	1.30376
2015-01-23 09:30:00	5.69699	31.8838	5.54763	-1.38658	99.8253	1.2793	277.787	82.2127	1.16643	1.04937
2015-01-23 10:00:00	7.3442	12.2088	7.28149	-1.02025	99.8195	1.2775	273.345	86.6549	1.24951	1.15631
2015-01-23 10:30:00	6.00534	47.2967	5.77612	-0.877716	99.812	1.27672	277.31	82.6896	1.65096	1.57596
2015-01-23 11:00:00	5.96183	-10.3694	6.00428	-0.325987	99.8013	1.27402	275.507	84.4925	1.24217	1.17107
2015-01-23 11:30:00	-0.683968	1.39665	-0.6897	0.144049	99.7927	1.27172	318.316	41.6836	1.10238	0.990796
2015-01-23 12:00:00	12.9159	72.3659	12.5773	0.790612	99.7578	1.26828	306.028	53.9716	0.844701	0.571855
2015-01-23 12:30:00	8.2966	31.5314	8.12158	1.34591	99.7148	1.2651	282.411	77.5885	0.831181	0.68711
2015-01-23 13:00:00	7.46002	15.049	7.37964	2.05246	99.6685	1.2613	309.306	50.694	0.567165	0.235887
2015-01-23 13:30:00	6.50189	23.7454	6.38309	2.76682	99.632	1.25758	35.6434	-35.6434	0.633126	0.468996
2015-01-23 14:00:00	-0.471713	31.7573	-0.616538	3.49049	99.5928	1.25381	57.3129	-57.3129	0.76165	0.496876
2015-01-23 14:30:00	8.95417	60.8871	8.69299	4.46231	99.5704	1.24918	93.1535	-93.1535	1.07093	0.749803
2015-01-23 15:00:00	-6.7952	76.7043	-7.04266	5.44651	99.5693	1.24483	148.548	-148.548	0.56803	0.250256
2015-01-23 15:30:00	13.2153	85.7493	13.0064	6.2214	99.5756	1.24153	148.795	-148.795	0.702247	0.60445
2015-01-23 16:00:00	3.66701	27.7555	3.59608	6.32987	99.5773	1.24106	139.402	-139.402	1.01669	0.958806
2015-01-23 16:30:00	-2.82455	-1.21723	-2.8196	6.68163	99.5858	1.23957	71.3542	-71.3542	0.665684	0.418502
2015-01-23 17:00:00	0.0641092	11.2972	0.0247623	6.53984	99.6183	1.24055	161.227	-161.227	0.835542	0.79165
2015-01-23 17:30:00	1.76128	-2.41145	1.76949	6.3856	99.6713	1.24185	174.152	-174.152	0.888722	0.832579
2015-01-23 18:00:00	-13.4428	-5.11335	-13.4174	6.27198	99.7178	1.24299	158.041	-158.041	1.82878	1.74813
2015-01-23 18:30:00	-18.9523	69.0802	-19.1946	5.23986	99.7787	1.24834	229.452	130.548	1.78733	1.00127
2015-01-23 19:00:00	2.42744	4.63212	2.4044	4.22722	99.8299	1.25346	278.945	81.0546	1.86346	1.84291
2015-01-23 19:30:00	3.27116	-1.53102	3.27531	4.14859	99.8605	1.25421	283.441	76.5592	1.46647	1.44035
2015-01-23 20:00:00	-0.85336	-14.3597	-0.794938	4.60419	99.9099	1.25281	265.872	94.1279	0.926601	0.46177
2015-01-23 20:30:00	0.720885	-5.37052	0.743432	4.34988	99.9483	1.25441	306.855	53.1446	0.686772	0.578719
2015-01-23 21:00:00	-0.995954	-1.33485	-0.989333	4.57779	99.9773	1.25374	191.698	168.302	0.622985	0.109989
2015-01-23 21:30:00	-1.69578	8.6628	-1.73057	4.70991	100.019	1.25369	292.749	67.2514	1.34944	1.32409
2015-01-23 22:00:00	2.80703	-23.544	2.89985	4.94405	100.049	1.25302	274.072	85.9285	1.31631	1.21066
2015-01-23 22:30:00	-0.605031	-16.7012	-0.531854	4.62208	100.069	1.25469	247.278	112.722	0.736791	0.256565
2015-01-23 23:00:00	-4.02472	-5.5585	-3.99325	4.26351	100.115	1.25683	263.448	96.5521	1.31511	1.01647
2015-01-23 23:30:00	-5.92614	3.39608	-5.936	3.72046	100.124	1.25948	268.285	91.7152	3.33423	3.31812
2015-01-24	9.20578	-21.8916	9.26018	4.19311	100.14	1.25767	273.154	86.8464	5.15691	5.12749
2015-01-24 00:30:00	1.28916	-6.3107	1.30515	3.9582	100.136	1.2587	280.077	79.9234	6.30827	6.28913
2015-01-24 01:00:00	17.3555	-40.5293	17.4679	2.90919	100.18	1.26399	278.162	81.8385	5.67581	5.57432
2015-01-24 01:30:00	16.8328	-57.9022	17.0306	2.65062	100.206	1.26546	281.847	78.1532	6.90732	6.8398
2015-01-24 02:00:00	13.0822	-80.0008	13.349	2.595	100.236	1.26611	281.271	78.7291	7.49485	7.42531
2015-01-24 02:30:00	-1.64469	-35.8501	-1.53847	2.3797	100.267	1.26753	277.079	82.9212	7.11916	7.06722
2015-01-24 03:00:00	-0.534336	-17.0604	-0.479993	2.38576	100.296	1.26785	275.441	84.5589	7.23132	7.20302
2015-01-24 03:30:00	5.43411	-26.1217	5.5019	2.2866	100.313	1.26856	273.805	86.1947	6.75851	6.70149
2015-01-24 04:00:00	6.29744	-30.3145	6.37627	2.15903	100.326	1.26932	270.114	89.886	5.67061	5.60966
2015-01-24 04:30:00	2.62521	-13.8848	2.6614	2.13262	100.331	1.2695	273.14	86.8596	6.23316	6.19097
2015-01-24 05:00:00	7.25323	-20.2139	7.3036	2.14817	100.358	1.26978	275.367	84.6334	5.98057	5.93401
2015-01-24 05:30:00	8.67098	-40.6454	8.78427	2.23523	100.376	1.26958	276.395	83.6051	6.46065	6.41144
2015-01-24 06:00:00	16.4901	-32.6779	16.57	2.07158	100.406	1.27073	278.171	81.8294	5.31371	5.22988
2015-01-24 06:30:00	-1.47981	-15.6782	-1.44207	1.83085	100.45	1.27243	302.961	57.0387	5.26844	5.14428
2015-01-24 07:00:00	0.67516	-9.61445	0.690766	1.82007	100.495	1.27312	313.529	46.4714	4.42079	4.31333
2015-01-24 07:30:00	-4.92714	-8.19025	-4.90717	2.01062	100.555	1.27294	354.031	5.96855	2.70739	2.47468
2015-01-24 08:00:00	-39.4117	2.74699	-39.3893	2.24982	100.586	1.27198	42.108	-42.108	3.10428	2.9957
2015-01-24 08:30:00	-67.2638	31.3128	-67.4275	2.11524	100.642	1.273	44.3356	-44.3356	3.65239	3.52653
2015-01-24 09:00:00	19.469	35.0829	19.0686	1.97327	100.682	1.274	49.88	-49.88	3.23625	3.08284
2015-01-24 09:30:00	1.47195	81.0655	0.609452	1.63151	100.722	1.27607	58.3472	-58.3472	3.65068	3.53073
2015-01-24 10:00:00	0.579019	63.026	-0.0639349	1.46475	100.76	1.27737	59.3376	-59.3376	3.43907	3.31245
2015-01-24 10:30:00	5.74918	41.7798	5.33599	1.30109	100.783	1.27847	69.5068	-69.5068	3.28188	3.17948
2015-01-24 11:00:00	2.94943	39.2974	2.58219	1.25142	100.78	1.2787	79.48	-79.48	3.21073	3.13466
2015-01-24 11:30:00	24.8899	86.097	24.068	1.48626	100.765	1.27743	67.5501	-67.5501	2.39538	2.24174
2015-01-24 12:00:00	-0.152656	65.8454	-0.675859	1.57892	100.704	1.27633	59.122	-59.122	2.6222	2.37816
2015-01-24 12:30:00	24.7306	29.1468	24.5197	1.77533	100.619	1.27448	28.9743	-28.9743	2.80826	2.69692
2015-01-24 13:00:00	36.946	53.5639	36.5954	2.05792	100.539	1.27221	33.8274	-33.8274	2.86179	2.67838
2015-01-24 13:30:00	62.379	100.256	61.6728	2.23992	100.51	1.27095	41.8022	-41.8022	1.91084	1.81722
2015-01-24 14:00:00	48.1792	71.4491	47.6304	2.36157	100.505	1.27029	76.0646	-76.0646	2.55834	2.45627
2015-01-24 14:30:00	19.3088	65.6967	18.9073	2.52594	100.55	1.27019	77.5849	-77.5849	2.21256	2.08806
2015-01-24 15:00:00	56.0268	54.9197	55.637	2.67546	100.549	1.26946	56.3436	-56.3436	2.11141	1.95384
2015-01-24 15:30:00	-0.785183	52.726	-1.0482	2.67625	100.528	1.26928	55.2417	-55.2417	1.93391	1.83474
2015-01-24 16:00:00	-5.71092	34.8053	-5.88318	2.78241	100.549	1.26905	78.1473	-78.1473	1.34842	1.17166
2015-01-24 16:30:00	-12.791	27.3722	-12.9196	2.88085	100.567	1.26883	35.2531	-35.2531	1.02257	0.671251
2015-01-24 17:00:00	-9.91883	5.03266	-9.93512	2.93727	100.592	1.26889	107.441	-107.441	0.597674	0.185322
2015-01-24 17:30:00	9.35767	26.353	9.21424	2.88106	100.596	1.2692	291.795	68.2052	2.02724	1.92667
2015-01-24 18:00:00	-8.86719	49.9408	-9.13484	2.62462	100.616	1.27059	267.421	92.5794	2.61746	2.40287
2015-01-24 18:30:00	-38.5222	66.3222	-38.9993	1.92574	100.641	1.27391	271.999	88.0006	2.50392	2.27916
2015-01-24 19:00:00	-65.6426	68.6173	-66.2323	1.41516	100.653	1.27623	355.662	4.33824	2.6142	1.96214
2015-01-24 19:30:00	15.8195	40.4404	15.3209	1.3083	100.667	1.27681	26.2455	-26.2455	2.13499	1.96169
2015-01-24 20:00:00	18.0156	78.7558	16.9012	0.789062	100.674	1.27914	43.4333	-43.4333	2.13739	1.97799
2015-01-24 20:30:00	-9.35212	33.5621	-9.8278	0.401106	100.679	1.2809	12.372	-12.372	2.19728	2.0975
2015-01-24 21:00:00	1.63149	28.4209	1.15068	0.0147463	100.677	1.28253	39.1554	-39.1554	2.39722	2.23142
2015-01-24 21:30:00	-167.626	70.3738	-168.187	-0.207665	100.689	1.28397	72.8607	-72.8607	2.15048	2.03954
2015-01-24 22:00:00	-42.9743	24.8742	-43.1582	-0.504071	100.698	1.28577	66.6942	-66.6942	2.36734	2.27362
2015-01-24 22:30:00	4.61085	39.3248	3.94681	-0.606931	100.692	1.28567	61.7878	-61.7878	2.94714	2.86225
2015-01-24 23:00:00	-6.94233	34.0421	-7.46507	-0.534619	100.699	1.28546	70.5313	-70.5313	2.3513	2.23317
2015-01-24 23:30:00	15.2508	35.4248	14.6072	-0.487097	100.701	1.28519	69.9647	-69.9647	1.99724	1.8804
2015-01-25	7.15418	32.8201	6.58043	-0.574345	100.693	1.28549	59.895	-59.895	2.82008	2.7374
2015-01-25 00:30:00	7.16156	35.3309	6.56336	-0.559078	100.68	1.2853	59.564	-59.564	2.82178	2.73415
2015-01-25 01:00:00	-5.38841	36.1466	-5.95696	-0.455513	100.669	1.28469	84.1663	-84.1663	2.29134	2.08722
2015-01-25 01:30:00	15.2519	41.6585	14.5421	-0.376676	100.642	1.28398	102.762	-102.762	1.73594	1.53817
2015-01-25 02:00:00	8.92317	41.4018	8.22912	-0.40775	100.641	1.28411	114.914	-114.914	2.28839	2.14111
2015-01-25 02:30:00	13.1329	30.3348	12.6179	-0.502616	100.645	1.28464	125.411	-125.411	2.31211	2.23755
2015-01-25 03:00:00	32.2262	22.9663	31.7959	-0.556268	100.626	1.28472	132.084	-132.084	2.48071	2.43395
2015-01-25 03:30:00	-0.840346	12.0663	-1.00799	-0.54221	100.59	1.28427	129.691	-129.691	2.65678	2.61795
2015-01-25 04:00:00	-26.5654	50.3338	-27.1788	-0.379001	100.573	1.28333	113.348	-113.348	2.33671	2.0744
2015-01-25 04:30:00	6.27252	14.4955	6.0813	-0.336038	100.54	1.28282	109.478	-109.478	1.56924	1.45181
2015-01-25 05:00:00	7.34246	11.0946	7.19632	-0.253392	100.499	1.28196	86.8794	-86.8794	1.04638	0.913799
2015-01-25 05:30:00	-5.29083	25.8708	-5.59906	-0.22948	100.48	1.28154	125.489	-125.489	1.86731	1.81742
2015-01-25 06:00:00	23.838	34.9141	23.2924	-0.203434	100.469	1.28115	119.568	-119.568	2.42946	2.33326
2015-01-25 06:30:00	20.3414	49.6217	19.564	-0.23435	100.481	1.28139	106.517	-106.517	2.17661	2.08832
2015-01-25 07:00:00	40.0767	37.0778	39.418	-0.239242	100.504	1.28167	110.834	-110.834	1.92877	1.81659
2015-01-25 07:30:00	19.4058	47.8526	18.6726	-0.283405	100.518	1.28211	109.289	-109.289	2.05875	1.96746
2015-01-25 08:00:00	0.755002	43.3535	0.118208	-0.281929	100.509	1.28197	98.088	-98.088	1.72601	1.60767
2015-01-25 08:30:00	4.06951	33.7173	3.56966	-0.314531	100.517	1.28223	121.331	-121.331	2.33191	2.24995
2015-01-25 09:00:00	11.9664	29.0234	11.5016	-0.2672	100.546	1.28234	138.66	-138.66	2.4229	2.37349
2015-01-25 09:30:00	-1.11535	28.0559	-1.52528	-0.236396	100.576	1.2826	132.488	-132.488	2.71025	2.61425
2015-01-25 10:00:00	13.9355	44.9265	13.2405	-0.088269	100.592	1.28211	125.709	-125.709	2.68514	2.60853
2015-01-25 10:30:00	-11.4295	76.5903	-12.5122	0.103831	100.582	1.28108	107.454	-107.454	1.96367	1.85007
2015-01-25 11:00:00	4.64835	38.8802	4.07019	0.198999	100.563	1.2804	110.396	-110.396	1.88405	1.76015
2015-01-25 11:30:00	-25.4843	75.6461	-26.48	0.787859	100.519	1.27713	71.1254	-71.1254	0.936291	0.590695
2015-01-25 12:00:00	1.24289	36.9487	0.743018	1.01561	100.454	1.2753	67.6018	-67.6018	1.28797	0.952344
2015-01-25 12:30:00	-19.8319	30.8588	-20.2121	1.39002	100.432	1.27323	105.781	-105.781	1.60272	1.24358
2015-01-25 13:00:00	16.9898	120.404	15.2792	1.53679	100.394	1.27208	111.579	-111.579	2.17999	1.93084
2015-01-25 13:30:00	29.1675	167.729	26.8136	1.70674	100.303	1.27016	105.593	-105.593	1.72259	1.5156
2015-01-25 14:00:00	1.62414	206.876	-1.1824	2.06515	100.246	1.26779	117.615	-117.615	1.34776	1.20473
2015-01-25 14:30:00	4.11863	129.588	2.36191	2.60003	100.197	1.26471	100.476	-100.476	1.06296	0.847425
2015-01-25 15:00:00	-1.06441	37.2938	-1.585	2.98528	100.165	1.2625	101.31	-101.31	1.26311	1.00384
2015-01-25 15:30:00	17.6047	63.8545	16.5682	3.12012	100.16	1.2617	63.1179	-63.1179	1.95076	1.5737
2015-01-25 16:00:00	19.2225	62.3423	18.2075	3.13174	100.148	1.26149	44.529	-44.529	2.06837	1.92185
2015-01-25 16:30:00	1.50119	44.047	0.822091	3.23136	100.12	1.26069	47.9648	-47.9648	1.81885	1.61219
2015-01-25 17:00:00	-7.42902	57.4363	-8.28785	3.14045	100.133	1.26128	77.8133	-77.8133	2.66981	2.55949
2015-01-25 17:30:00	-2.00869	47.8719	-2.76363	2.81663	100.164	1.2631	113.246	-113.246	3.12985	3.05758
2015-01-25 18:00:00	6.53206	15.82	6.25826	2.48789	100.196	1.26499	113.621	-113.621	4.12894	4.09569
2015-01-25 18:30:00	12.737	6.52837	12.5947	2.32309	100.221	1.26606	105.525	-105.525	3.41185	3.32139
2015-01-25 19:00:00	7.07113	14.3001	6.81931	1.75902	100.243	1.26893	105.895	-105.895	3.62183	3.5334
2015-01-25 19:30:00	13.222	53.9517	12.2759	1.27834	100.281	1.27158	105.671	-105.671	3.03212	2.93418
2015-01-25 20:00:00	17.2314	22.783	16.7936	1.02324	100.298	1.27298	109.46	-109.46	3.02722	2.92342
2015-01-25 20:30:00	3.02833	21.5798	2.65445	0.866874	100.314	1.27391	108.857	-108.857	3.08221	2.99515
2015-01-25 21:00:00	12.4448	39.5356	11.7321	0.685904	100.35	1.27519	101.298	-101.298	2.9011	2.80123
2015-01-25 21:30:00	5.4308	20.9903	5.05719	0.478639	100.365	1.27636	96.1379	-96.1379	3.75195	3.65528
2015-01-25 22:00:00	7.64972	15.1529	7.37502	0.489562	100.356	1.27622	92.295	-92.295	2.36992	2.22389
2015-01-25 22:30:00	20.0222	15.0669	19.71	0.411986	100.36	1.27663	106.298	-106.298	2.10825	2.01225
2015-01-25 23:00:00	1.61665	7.34638	1.49014	0.365821	100.378	1.27709	105.13	-105.13	1.75265	1.65164
2015-01-25 23:30:00	3.78491	16.1662	3.50633	0.33873	100.39	1.27737	106.602	-106.602	1.79201	1.72376
2015-01-26	1.75374	10.4055	1.57734	0.241725	100.399	1.27794	118.337	-118.337	1.8079	1.72951
2015-01-26 00:30:00	1.55455	3.42121	1.49406	0.258075	100.394	1.27782	132.706	-132.706	1.52943	1.42417
2015-01-26 01:00:00	1.21676	-3.58136	1.27188	0.283677	100.392	1.27766	186.651	173.349	0.993097	0.96496
2015-01-26 01:30:00	-1.71608	1.38719	-1.73388	0.220919	100.335	1.27723	295.38	64.6203	0.323533	0.119506
2015-01-26 02:00:00	-0.124343	2.00152	-0.157241	0.100407	100.299	1.27732	242.762	117.238	0.290985	0.19599
2015-01-26 02:30:00	0.0656516	0.283659	0.0607617	-0.124787	100.282	1.27816	188.101	171.899	0.536277	0.468716
2015-01-26 03:00:00	-1.58545	-5.06576	-1.49743	-0.35938	100.268	1.27909	196.704	163.296	0.70157	0.626965
2015-01-26 03:30:00	2.15059	3.99654	2.08042	-0.62288	100.253	1.28018	255.698	104.302	0.940313	0.851854
2015-01-26 04:00:00	-0.39207	-1.41936	-0.36835	-0.77453	100.216	1.28043	267.157	92.8426	0.917788	0.87246
2015-01-26 04:30:00	-0.61368	-4.44117	-0.543189	-1.03275	100.191	1.28136	268.101	91.8994	1.98139	1.94907
2015-01-26 05:00:00	-3.62414	-14.8563	-3.39298	-1.53772	100.153	1.28331	252.833	107.167	2.69063	2.65347
2015-01-26 05:30:00	-2.81589	-10.2106	-2.66052	-1.7056	100.186	1.28456	249.79	110.21	2.1808	2.1158
2015-01-26 06:00:00	-1.58316	3.57036	-1.6287	-1.90656	100.254	1.28645	272.865	87.1348	1.20066	1.02351
2015-01-26 06:30:00	0.735356	2.25999	0.700361	-1.5416	100.299	1.28523	285.737	74.2631	1.68645	1.66384
2015-01-26 07:00:00	-1.4559	-0.274481	-1.44794	-1.35533	100.314	1.28451	279.191	80.8088	2.56068	2.52159
2015-01-26 07:30:00	0.739569	-4.5739	0.807198	-1.11326	100.357	1.28389	257.409	102.591	1.67328	1.63937
2015-01-26 08:00:00	12.7931	-55.6992	13.5851	-0.663758	100.45	1.28299	236.946	123.054	1.8207	1.61069
2015-01-26 08:30:00	19.3774	-42.9101	19.8835	1.42468	100.491	1.27392	236.468	123.532	3.76054	3.54584
2015-01-26 09:00:00	25.2864	-51.9568	25.738	3.23415	100.558	1.2667	222.065	137.935	3.04631	2.84828
2015-01-26 09:30:00	14.7131	-23.4869	14.8734	3.7833	100.583	1.26466	203.532	156.468	4.88376	4.59273
2015-01-26 10:00:00	14.1313	-5.94506	14.1545	3.91981	100.624	1.26463	216.47	143.53	6.01019	5.75409
2015-01-26 10:30:00	9.93733	3.90034	9.90095	3.74041	100.653	1.26587	220.728	139.272	7.25009	6.97733
2015-01-26 11:00:00	13.3498	9.00325	13.288	3.6708	100.684	1.26668	225.108	134.892	10.4528	10.2077
2015-01-26 11:30:00	8.98587	36.7772	8.80536	3.52022	100.807	1.26895	220.48	139.52	6.42923	6.22676
2015-01-26 12:00:00	4.01449	23.6082	3.91495	3.20081	100.855	1.27107	226.055	133.945	6.01875	5.77193
2015-01-26 12:30:00	9.13144	49.6687	9.05813	2.60639	100.868	1.27422	228.02	131.98	6.61127	6.36853
2015-01-26 13:00:00	-3.09628	36.8861	-3.12819	2.38181	100.878	1.27543	226.842	133.158	6.53029	6.28784
2015-01-26 13:30:00	17.7188	51.4559	17.7209	2.24747	100.874	1.27608	228.214	131.786	5.36709	5.07423
2015-01-26 14:00:00	6.84951	38.3322	6.87997	2.04247	100.884	1.27722	228.202	131.798	5.8986	5.69722
2015-01-26 14:30:00	0.341582	22.9386	0.3663	1.83341	100.887	1.27826	229.36	130.64	5.94353	5.6655
2015-01-26 15:00:00	2.28686	26.4344	2.32747	1.65621	100.924	1.27959	231.815	128.185	5.69165	5.49284
2015-01-26 15:30:00	4.87065	27.7614	4.92723	1.65166	100.963	1.28015	234.485	125.515	5.05161	4.82117
2015-01-26 16:00:00	7.18924	20.7496	7.22717	1.64204	100.986	1.28046	237.125	122.875	4.89302	4.69527
2015-01-26 16:30:00	-26.6843	-4.64399	-26.7046	1.49029	101.014	1.28156	231.149	128.851	5.30099	5.0336
2015-01-26 17:00:00	3.2897	33.0628	3.36923	1.02587	101.06	1.28434	229.669	130.331	6.44077	6.22457
2015-01-26 17:30:00	6.90904	21.0973	6.9624	0.720955	101.131	1.28666	226.151	133.849	4.54211	4.31024
2015-01-26 18:00:00	10.8394	3.35994	10.8509	0.118994	101.195	1.2903	226.519	133.481	6.56296	6.35627
2015-01-26 18:30:00	5.03308	16.2521	5.06076	-0.432722	101.273	1.29386	228.987	131.013	6.45942	6.2631
2015-01-26 19:00:00	7.56688	15.4763	7.59475	-0.83642	101.343	1.29667	228.996	131.004	5.96998	5.77377
2015-01-26 19:30:00	8.35608	10.2696	8.3748	-1.17142	101.388	1.29885	229.601	130.399	5.10229	4.90522
2015-01-26 20:00:00	1.88893	4.9871	1.89622	-1.48373	101.458	1.30121	231.5	128.5	4.06918	3.89875
2015-01-26 20:30:00	7.04037	3.89044	7.04706	-1.80615	101.491	1.30317	230.134	129.866	4.04873	3.89611
2015-01-26 21:00:00	3.8956	0.759288	3.89758	-2.21407	101.511	1.30541	232.508	127.492	4.74164	4.54654
2015-01-26 21:30:00	-0.124146	13.4581	-0.115314	-2.43671	101.545	1.30685	220.174	139.826	4.98524	4.72199
2015-01-26 22:00:00	6.61012	14.5607	6.62175	-2.84346	101.575	1.30921	219.167	140.833	5.39922	5.06722
2015-01-26 22:30:00	5.26573	9.08898	5.27346	-3.26271	101.606	1.31165	220.772	139.228	4.55641	4.31278
2015-01-26 23:00:00	5.41437	16.6667	5.42679	-3.65138	101.627	1.3138	226.003	133.997	5.31333	5.13133
2015-01-26 23:30:00	6.78064	2.06269	6.78318	-3.89597	101.663	1.31547	222.41	137.59	3.90504	3.74983
2015-01-27	10.0491	14.4385	10.0641	-4.09139	101.694	1.31684	225.333	134.667	4.72485	4.49986
2015-01-27 00:30:00	5.40953	12.5702	5.42084	-4.37473	101.701	1.31831	222.87	137.13	5.3282	5.1445
2015-01-27 01:00:00	3.59144	5.04431	3.59557	-4.78	101.717	1.3205	225.555	134.445	5.00066	4.83578
2015-01-27 01:30:00	6.29016	-1.78735	6.28984	-5.06394	101.735	1.32211	229.441	130.559	3.39963	3.17631
2015-01-27 02:00:00	2.07726	0.843542	2.07782	-5.28266	101.726	1.32307	222.398	137.602	3.46695	3.16089
2015-01-27 02:30:00	4.62249	13.146	4.62977	-5.55553	101.681	1.32385	218.89	141.11	6.54906	6.27238
2015-01-27 03:00:00	5.88797	-0.620594	5.88815	-5.7496	101.699	1.32503	213.472	146.528	5.30995	5.05992
2015-01-27 03:30:00	3.23652	3.57584	3.23776	-5.9637	101.698	1.32607	215.409	144.591	4.31301	4.09384
2015-01-27 04:00:00	2.22171	10.2496	2.22435	-6.17164	101.675	1.32679	222.405	137.595	3.95107	3.67885
2015-01-27 04:30:00	2.24007	-0.0954741	2.24013	-6.31531	101.661	1.32732	225.436	134.564	3.20777	2.99385
2015-01-27 05:00:00	4.90258	3.72826	4.90364	-6.39748	101.625	1.32727	225.082	134.918	4.38803	4.21488
2015-01-27 05:30:00	4.77091	-3.68903	4.77041	-6.46947	101.612	1.32744	231.168	128.832	3.98725	3.7879
2015-01-27 06:00:00	1.85068	3.21172	1.85112	-6.58574	101.614	1.32805	233.432	126.568	4.39698	4.25275
2015-01-27 06:30:00	1.8869	2.83114	1.88704	-6.65908	101.611	1.32837	237.593	122.407	4.55863	4.42039
2015-01-27 07:00:00	2.61526	0.271148	2.61531	-6.62122	101.645	1.32862	238.451	121.549	4.4024	4.2617
2015-01-27 07:30:00	1.89699	-11.0359	1.8968	-6.73811	101.679	1.32965	240.69	119.31	4.62439	4.5083
2015-01-27 08:00:00	1.6309	9.76458	1.63081	-6.93152	101.696	1.33084	245.518	114.483	4.29696	4.15693
2015-01-27 08:30:00	6.84575	21.6532	6.85056	-7.13412	101.734	1.33237	260.425	99.5751	5.18295	5.09143
2015-01-27 09:00:00	-5.20143	24.236	-5.18781	-7.30716	101.753	1.33352	252.745	107.254	5.70799	5.59835
2015-01-27 09:30:00	0.680829	23.7279	0.696533	-7.01849	101.764	1.33222	251.102	108.898	5.77076	5.66387
2015-01-27 10:00:00	2.3716	56.4067	2.41162	-6.83544	101.771	1.3314	259.13	100.87	5.05839	4.99096
2015-01-27 10:30:00	-0.543569	70.0271	-0.483145	-6.02835	101.76	1.32724	244.387	115.613	3.79418	3.67525
2015-01-27 11:00:00	7.21275	-15.3687	7.19666	-5.4555	101.738	1.32414	241.463	118.537	5.0915	4.94736
2015-01-27 11:30:00	-1.11475	97.7521	-0.976001	-4.71834	101.725	1.32036	240.484	119.516	4.60802	4.39126
2015-01-27 12:00:00	4.06119	75.987	4.18032	-4.4809	101.678	1.3186	235.275	124.725	4.95918	4.79952
2015-01-27 12:30:00	5.16055	127.128	5.37569	-3.80467	101.604	1.31435	229.852	130.148	4.16429	3.96211
2015-01-27 13:00:00	3.75883	80.6061	3.91371	-2.94904	101.548	1.30948	229.831	130.169	3.72387	3.51817
2015-01-27 13:30:00	3.24328	104.662	3.45725	-2.43018	101.483	1.30615	225.343	134.657	3.81625	3.59265
2015-01-27 14:00:00	3.27605	96.3881	3.47957	-1.87819	101.419	1.30267	230.498	129.502	4.20005	4.01949
2015-01-27 14:30:00	3.49761	121.239	3.76853	-1.38758	101.366	1.29966	231.49	128.51	4.76828	4.5453
2015-01-27 15:00:00	4.18756	95.8628	4.40993	-0.842168	101.313	1.29638	228.054	131.946	4.33799	4.05162
2015-01-27 15:30:00	-2.49213e+17	-1.89964e+16	-2.10248e+21	-0.612099	101.303	-532766500000000	235.863	124.136	5.25767	4.95153
2015-01-27 16:00:00	4.2362	42.4765	4.38019	-0.400222	101.304	1.29426	234.243	125.757	5.0332	4.86489
2015-01-27 16:30:00	2.02998	21.2103	2.09471	-0.152615	101.284	1.29279	233.873	126.127	4.66806	4.49388
2015-01-27 17:00:00	3.88227	22.7049	3.94968	0.117027	101.282	1.29148	232.903	127.097	3.79255	3.57995
2015-01-27 17:30:00	5.65092	4.51634	5.66304	0.171017	101.281	1.29115	231.586	128.414	3.40518	3.25712
2015-01-27 18:00:00	0.368434	8.36611	0.387301	-0.209785	101.301	1.29322	255.599	104.401	2.68231	2.15233
2015-01-27 18:30:00	-3.57684	1.23271	-3.5759	-0.853941	101.334	1.29664	296.921	63.0787	1.89544	1.82954
2015-01-27 19:00:00	1.08313	-8.37927	1.07325	-0.853956	101.362	1.29696	273.288	86.7115	1.43003	1.36072
2015-01-27 19:30:00	-0.684712	5.37496	-0.679618	-0.843179	101.38	1.29713	260.52	99.4796	0.650808	0.542871
2015-01-27 20:00:00	-3.97052	-2.86547	-3.97526	-0.713079	101.402	1.29681	195.789	164.211	0.991186	0.89166
2015-01-27 20:30:00	3.05877	-2.57821	3.05541	-0.808086	101.407	1.29736	193.509	166.491	0.800206	0.656857
2015-01-27 21:00:00	7.01611	-1.15104	7.01632	-0.950528	101.437	1.29843	194.207	165.793	1.49753	1.39481
2015-01-27 21:30:00	2.2224	-3.4368	2.21773	-1.10081	101.456	1.29937	198.992	161.008	0.669874	0.593164
2015-01-27 22:00:00	0.932911	-3.96336	0.927446	-1.19924	101.472	1.30004	198.506	161.494	0.654749	0.540277
2015-01-27 22:30:00	6.05961	-1.48954	6.059	-1.26374	101.502	1.30075	189.94	170.06	1.22668	1.06539
2015-01-27 23:00:00	4.38396	0.247754	4.38525	-1.31584	101.522	1.30123	172.914	-172.914	1.29655	1.14511
2015-01-27 23:30:00	5.8112	1.06633	5.8132	-1.4237	101.555	1.30213	143.476	-143.476	1.69349	1.64051
2015-01-28	9.95579	-0.957018	9.95662	-1.51062	101.588	1.30297	144.548	-144.548	1.91806	1.87333
2015-01-28 00:30:00	5.79442	-1.45763	5.79386	-1.61569	101.601	1.30369	150.843	-150.843	1.9335	1.88933
2015-01-28 01:00:00	0.252229	-5.58724	0.245012	-1.75896	101.596	1.30429	195.095	164.905	1.12141	0.800014
2015-01-28 01:30:00	4.16076	9.96158	4.17457	-2.0279	101.591	1.30553	263.133	96.8667	2.25182	2.20062
2015-01-28 02:00:00	8.14883	20.7863	8.17484	-2.74986	101.572	1.30876	291.61	68.39	4.62998	4.60323
2015-01-28 02:30:00	7.92127	-3.91158	7.91816	-3.31034	101.526	1.31089	282.069	77.9312	5.03288	4.94581
2015-01-28 03:00:00	5.7222	35.6797	5.77237	-3.92201	101.469	1.31314	276.198	83.8018	6.64185	6.5259
2015-01-28 03:30:00	5.60116	-7.28324	5.59347	-4.46838	101.476	1.31589	276.626	83.3743	6.0761	5.9811
2015-01-28 04:00:00	7.7923	-6.92565	7.78601	-4.7631	101.47	1.31724	280.421	79.5787	5.17009	5.08974
2015-01-28 04:30:00	7.41198	-7.59623	7.40493	-4.92082	101.461	1.3179	280.782	79.2178	4.02978	3.91623
2015-01-28 05:00:00	6.71826	-1.24015	6.71821	-4.97225	101.461	1.31816	279.614	80.3861	3.7625	3.66267
2015-01-28 05:30:00	4.05003	-3.62259	4.04624	-4.9771	101.461	1.3182	272.837	87.1625	3.84671	3.75801
2015-01-28 06:00:00	6.66116	1.64222	6.66457	-5.10689	101.459	1.31879	288.327	71.6726	2.23222	2.11516
2015-01-28 06:30:00	-6.45171	10.4842	-6.4453	-5.1634	101.452	1.31894	292.929	67.0714	2.9935	2.92754
2015-01-28 07:00:00	12.6058	18.2573	12.6259	-5.24324	101.468	1.31957	294.567	65.4334	3.04547	2.92566
2015-01-28 07:30:00	6.74123	14.1758	6.75526	-5.3757	101.501	1.32065	285.147	74.8528	2.4533	2.36134
2015-01-28 08:00:00	3.19496	-0.353402	3.19517	-5.38473	101.504	1.32073	285.041	74.959	3.18061	3.1336
2015-01-28 08:30:00	6.61591	14.5109	6.62807	-5.386	101.529	1.32105	285.969	74.0311	3.32905	3.24943
2015-01-28 09:00:00	10.7005	27.6698	10.7292	-5.35419	101.569	1.32142	285.568	74.4324	2.07948	1.96193
2015-01-28 09:30:00	2.11282	30.3673	2.15316	-5.30508	101.573	1.32126	288.259	71.7415	2.53657	2.4437
2015-01-28 10:00:00	5.2093	81.6499	5.31802	-5.09421	101.589	1.32044	282.779	77.2212	2.91233	2.8136
2015-01-28 10:30:00	1.76591	13.1685	1.78548	-4.81356	101.567	1.31878	273.842	86.1581	3.60509	3.56588
2015-01-28 11:00:00	8.32241	117.683	8.53599	-4.29524	101.556	1.31613	280.306	79.6944	3.12645	3.04016
2015-01-28 11:30:00	-0.655075	165.674	-0.349013	-3.83547	101.51	1.31329	286.239	73.7614	2.49144	2.2371
2015-01-28 12:00:00	-3.73542	127.618	-3.48661	-3.34968	101.454	1.31022	297.679	62.3207	1.82655	1.62612
2015-01-28 12:30:00	-0.933928	120.907	-0.701466	-2.72537	101.403	1.30653	291.415	68.5849	1.60917	1.26993
2015-01-28 13:00:00	-5.86271	139.072	-5.60775	-2.28441	101.35	1.30371	283.813	76.1868	1.88799	1.66733
2015-01-28 13:30:00	-7.40992	173.557	-7.0634	-2.03989	101.256	1.30135	303.851	56.149	2.05709	1.73981
2015-01-28 14:00:00	10.4544	111.375	10.6821	-1.5797	101.198	1.29839	4.27364	-4.27365	2.38294	1.97192
2015-01-28 14:30:00	-11.8222	131.146	-11.5491	-1.2779	101.154	1.29641	7.0382	-7.03821	2.33385	2.0917
2015-01-28 15:00:00	-16.137	206.94	-15.759	-0.903531	101.114	1.29409	70.7146	-70.7146	2.27604	1.97528
2015-01-28 15:30:00	2.1796	94.163	2.38045	-0.841024	101.1	1.29362	31.7156	-31.7156	2.01556	1.64459
2015-01-28 16:00:00	4.62252	67.291	4.7562	-0.786774	101.089	1.29322	47.9671	-47.9671	2.52123	2.37523
2015-01-28 16:30:00	18.4214	58.1402	18.518	-0.736526	101.063	1.29262	32.6528	-32.6528	2.82632	2.64753
2015-01-28 17:00:00	9.51798	73.4737	9.63602	-0.728063	101.074	1.29271	47.5423	-47.5423	2.56147	2.41325
2015-01-28 17:30:00	15.1527	55.5957	15.2219	-0.790022	101.081	1.29306	45.5879	-45.5879	2.98622	2.85705
2015-01-28 18:00:00	8.07135	34.826	8.12293	-0.878949	101.083	1.29353	41.7669	-41.7669	3.38362	3.27772
2015-01-28 18:30:00	9.63123	55.5498	9.7162	-0.915129	101.079	1.29366	54.8385	-54.8385	3.52973	3.38717
2015-01-28 19:00:00	4.5084	39.484	4.55441	-0.878876	101.087	1.29355	65.341	-65.3409	3.29869	3.086
2015-01-28 19:30:00	1.50125	31.995	1.53772	-0.981475	101.089	1.29407	85.5119	-85.5119	4.76004	4.63911
2015-01-28 20:00:00	6.47188	24.903	6.50425	-1.04677	101.086	1.29435	81.881	-81.881	4.54478	4.48466
2015-01-28 20:30:00	0.234181	23.9263	0.263794	-1.07998	101.073	1.29434	84.3638	-84.3638	3.95041	3.83252
2015-01-28 21:00:00	-0.866563	45.3402	-0.811929	-1.10132	101.072	1.29442	64.3941	-64.394	2.97774	2.83015
2015-01-28 21:30:00	6.69911	29.4808	6.73039	-1.16602	101.08	1.29482	53.6313	-53.6313	2.7206	2.60991
2015-01-28 22:00:00	4.72455	20.1512	4.74534	-1.30028	101.094	1.29563	54.7738	-54.7738	3.50417	3.40939
2015-01-28 22:30:00	5.12999	23.9305	5.15289	-1.33867	101.081	1.29564	58.3674	-58.3674	3.0683	2.96224
2015-01-28 23:00:00	3.23656	15.104	3.24753	-1.32536	101.082	1.29558	61.6168	-61.6168	2.46638	2.33808
2015-01-28 23:30:00	8.3667	12.5033	8.378	-1.22202	101.05	1.29469	83.4172	-83.4172	3.71451	3.61702
2015-01-29	7.25372	21.1532	7.27577	-1.26604	101.025	1.29459	87.1896	-87.1896	4.88599	4.81616
2015-01-29 00:30:00	4.12913	10.286	4.13938	-1.35655	100.985	1.2945	85.3925	-85.3925	4.51147	4.46647
2015-01-29 01:00:00	-8.64183	28.3647	-8.62601	-1.35922	100.961	1.29418	105.606	-105.606	2.98237	2.7975
2015-01-29 01:30:00	-0.741564	22.6481	-0.734951	-1.66932	100.924	1.29515	117.113	-117.113	3.5735	3.5263
2015-01-29 02:00:00	-11.8076	27.3182	-11.8494	-1.82727	100.903	1.29546	117.795	-117.795	4.63359	4.54288
2015-01-29 02:30:00	26.6913	13.2519	26.6044	-1.94205	100.897	1.29567	132.47	-132.47	4.27592	4.19014
2015-01-29 03:00:00	9.70256	44.9354	9.56287	-1.86968	100.884	1.29531	101.322	-101.322	4.35366	4.12462
2015-01-29 03:30:00	-27.5526	73.0028	-27.9204	-2.49773	100.863	1.29783	92.5021	-92.5021	4.55473	4.44183
2015-01-29 04:00:00	8.66547	54.5563	8.2706	-2.71432	100.866	1.29877	93.6963	-93.6963	3.17287	3.01099
2015-01-29 04:30:00	34.0479	25.9934	33.7154	-3.47068	100.828	1.30162	85.775	-85.775	3.57801	3.47126
2015-01-29 05:00:00	3.05334	31.1114	2.68362	-3.57249	100.81	1.30177	87.5245	-87.5245	2.37366	2.30284
2015-01-29 05:30:00	-6.18041	73.9142	-7.03296	-3.3571	100.793	1.3005	93.2077	-93.2077	2.44253	2.31651
2015-01-29 06:00:00	30.6585	49.357	30.0552	-3.28728	100.789	1.30018	108.419	-108.419	2.53597	2.42648
2015-01-29 06:30:00	3.5211	30.0118	3.19531	-3.26395	100.788	1.30009	106.483	-106.483	3.10717	3.0098
2015-01-29 07:00:00	-11.5363	35.7787	-11.8799	-3.15338	100.798	1.29972	104.098	-104.098	2.7713	2.6273
2015-01-29 07:30:00	29.1586	70.2085	28.4069	-3.15695	100.806	1.29987	111.351	-111.351	2.99354	2.88838
2015-01-29 08:00:00	1.57618	56.5776	0.985093	-3.04039	100.853	1.29987	108.821	-108.821	2.58481	2.4531
2015-01-29 08:30:00	10.1868	20.6386	9.95718	-3.1224	100.874	1.30055	126.887	-126.887	3.14893	3.1183
2015-01-29 09:00:00	0.650644	9.10053	0.557924	-3.06242	100.878	1.30033	127.587	-127.587	2.66929	2.59293
2015-01-29 09:30:00	2.17903	46.5612	1.69073	-2.96974	100.864	1.29967	102.451	-102.451	1.83181	1.73194
2015-01-29 10:00:00	-2.2018	27.2324	-2.47129	-2.76164	100.859	1.29864	92.0971	-92.0971	1.37008	1.19697
2015-01-29 10:30:00	15.9161	14.4314	15.7422	-2.32881	100.844	1.29637	90.3601	-90.3601	1.20071	0.985316
2015-01-29 11:00:00	18.121	20.4293	17.8916	-1.9276	100.842	1.29445	116.799	-116.799	1.49024	1.17183
2015-01-29 11:30:00	16.5157	46.8445	16.1179	-1.09387	100.807	1.29019	188.094	171.906	1.03641	0.821695
2015-01-29 12:00:00	86.9186	16.2387	86.7379	-0.35238	100.764	1.28634	165.179	-165.179	1.20874	1.00613
2015-01-29 12:30:00	38.7605	84.4042	38.4305	0.403341	100.718	1.28238	180.431	179.569	3.01606	2.81047
2015-01-29 13:00:00	10.9942	99.8906	11.0276	1.28759	100.681	1.27812	192.559	167.441	5.2882	5.06657
2015-01-29 13:30:00	0.400904	110.314	0.458062	1.41101	100.644	1.2771	191.588	168.412	6.64753	6.39123
2015-01-29 14:00:00	4.02635	89.1925	4.08848	1.55638	100.62	1.27613	192.072	167.928	5.7178	5.51412
2015-01-29 14:30:00	-4.30675	116.959	-4.2123	1.58771	100.613	1.27591	191.557	168.443	6.81763	6.55583
2015-01-29 15:00:00	8.29522	120.142	8.44481	1.71195	100.614	1.27538	189.786	170.214	6.83546	6.58763
2015-01-29 15:30:00	-1.0092	81.4502	-0.899747	1.85331	100.635	1.275	196.09	163.91	5.37769	5.08675
2015-01-29 16:00:00	-7.14668	40.8777	-7.10296	1.8675	100.652	1.27513	195.26	164.74	6.40835	6.16111
2015-01-29 16:30:00	8.38093	48.4615	8.44559	1.7659	100.677	1.27592	194.61	165.39	6.42587	6.20727
2015-01-29 17:00:00	4.64883	46.8773	4.71716	1.64794	100.702	1.27681	194.023	165.977	6.11732	5.89574
2015-01-29 17:30:00	7.96533	17.2923	7.98798	1.49294	100.748	1.2781	196.748	163.252	4.95835	4.7658
2015-01-29 18:00:00	1.54933	2.09455	1.55172	1.11271	100.787	1.28034	196.649	163.351	5.25961	5.06716
2015-01-29 18:30:00	6.23736	7.8343	6.24855	0.720663	100.84	1.28286	202.968	157.032	4.81994	4.59702
2015-01-29 19:00:00	2.28917	6.72505	2.29912	0.42533	100.895	1.28496	198.31	161.69	5.52678	5.33976
2015-01-29 19:30:00	-2.50152	-2.39337	-2.50395	0.259249	100.958	1.2865	201.438	158.562	4.71143	4.49671
2015-01-29 20:00:00	3.58032	-1.98951	3.5793	0.0793755	100.999	1.28786	203.764	156.236	4.77312	4.56342
2015-01-29 20:30:00	-2.13318	6.27728	-2.12964	-0.205564	101.037	1.28968	206.728	153.272	4.42027	4.23369
2015-01-29 21:00:00	9.10139	20.769	9.11801	-0.689849	101.096	1.29273	228.638	131.362	3.60091	3.42967
2015-01-29 21:30:00	4.34644	-0.620195	4.34658	-1.19182	101.144	1.29574	225.695	134.305	4.92054	4.78343
2015-01-29 22:00:00	2.66059	13.8893	2.67434	-1.53673	101.178	1.29784	227.063	132.937	4.3273	4.16366
2015-01-29 22:30:00	3.63107	-0.733488	3.63099	-1.85774	101.217	1.29987	233.731	126.269	3.63999	3.43118
2015-01-29 23:00:00	4.67018	5.58601	4.67718	-2.1956	101.234	1.30173	239.478	120.522	3.98819	3.79432
2015-01-29 23:30:00	1.26523	-2.97358	1.26177	-2.57208	101.248	1.30373	242.506	117.495	5.1243	4.98079
2015-01-30	1.72502	-3.14168	1.72145	-2.85892	101.281	1.30554	243.238	116.762	4.90051	4.76611
2015-01-30 00:30:00	2.16987	-0.914769	2.16914	-2.98938	101.285	1.30623	240.226	119.774	4.14251	3.98549
2015-01-30 01:00:00	0.489049	-3.9347	0.483931	-3.18507	101.261	1.30686	236.594	123.406	4.52132	4.36743
2015-01-30 01:30:00	0.223642	-3.32378	0.219891	-3.36895	101.256	1.30768	235.145	124.855	4.60083	4.44814
2015-01-30 02:00:00	2.04021	-10.2019	2.02933	-3.61957	101.264	1.309	237.204	122.796	4.2181	4.06091
2015-01-30 02:30:00	2.75901	-11.2711	2.74831	-3.7457	101.284	1.30986	232.598	127.402	3.91108	3.71593
2015-01-30 03:00:00	2.83877	-5.61035	2.834	-3.85649	101.299	1.31058	232.833	127.167	3.77358	3.60519
2015-01-30 03:30:00	4.15102	-5.23262	4.14736	-4.04103	101.29	1.31135	230.478	129.522	4.13329	3.95825
2015-01-30 04:00:00	4.62017	-6.9814	4.61548	-4.13729	101.278	1.31166	225.064	134.936	4.03763	3.89705
2015-01-30 04:30:00	3.62928	-7.40279	3.62378	-4.11858	101.282	1.31164	222.253	137.747	4.23422	4.08262
2015-01-30 05:00:00	3.58911	-5.75758	3.58401	-4.03921	101.314	1.31167	215.927	144.073	3.17998	2.90804
2015-01-30 05:30:00	4.04811	-3.22531	4.0456	-4.2302	101.344	1.31299	220.893	139.107	2.75534	2.5788
2015-01-30 06:00:00	2.94988	-5.38	2.94513	-4.35179	101.374	1.31397	219.125	140.875	2.53066	2.37695
2015-01-30 06:30:00	2.88113	-9.60135	2.87248	-4.41059	101.395	1.31454	207.894	152.106	2.34461	2.22813
2015-01-30 07:00:00	3.3421	-8.80133	3.33535	-4.495	101.436	1.31546	216.273	143.727	1.76279	1.61121
2015-01-30 07:30:00	4.56485	-6.03582	4.55955	-4.53753	101.469	1.31612	230.639	129.361	3.19498	3.05748
2015-01-30 08:00:00	4.48227	-1.89481	4.48107	-4.68547	101.51	1.31738	235.68	124.32	4.09865	3.96826
2015-01-30 08:30:00	4.13228	6.67791	4.14107	-4.75957	101.549	1.31825	232.011	127.99	3.9268	3.78554
2015-01-30 09:00:00	2.20266	20.3749	2.2305	-4.71635	101.545	1.31801	236.823	123.177	4.60105	4.45678
2015-01-30 09:30:00	4.75893	39.4648	4.81532	-4.70838	101.556	1.31812	233.79	126.21	4.72209	4.50786
2015-01-30 10:00:00	3.1489	30.7887	3.19545	-4.53935	101.582	1.31764	231.997	128.003	4.55837	4.39898
	-9999	-9999	-9999	-9999	-9999	-9999	-9999	-9999	-9999	-9999
	-9999	-9999	-9999	-9999	-9999	-9999	-9999	-9999	-9999	-9999
	-9999	-9999	-9999	-9999	-9999	-9999	-9999	-9999	-9999	-9999
	-9999	-9999	-9999	-9999	-9999	-9999	-9999	-9999	-9999	-9999
	-9999	-9999	-9999	-9999	-9999	-9999	-9999	-9999	-9999	-9999
	-9999	-9999	-9999	-9999	-9999	-9999	-9999	-9999	-9999	-9999
	-9999	-9999	-9999	-9999	-9999	-9999	-9999	-9999	-9999	-9999
	-9999	-9999	-9999	-9999	-9999	-9999	-9999	-9999	-9999	-9999
	-9999	-9999	-9999	-9999	-9999	-9999	-9999	-9999	-9999	-9999
	-9999	-9999	-9999	-9999	-9999	-9999	-9999	-9999	-9999	-9999
	-9999	-9999	-9999	-9999	-9999	-9999	-9999	-9999	-9999	-9999
	-9999	-9999	-9999	-9999	-9999	-9999	-9999	-9999	-9999	-9999
	-9999	-9999	-9999	-9999	-9999	-9999	-9999	-9999	-9999	-9999
	-9999	-9999	-9999	-9999	-9999	-9999	-9999	-9999	-9999	-9999
	-9999	-9999	-9999	-9999	-9999	-9999	-9999	-9999	-9999	-9999
	-9999	-9999	-9999	-9999	-9999	-9999	-9999	-9999	-9999	-9999
	-9999	-9999	-9999	-9999	-9999	-9999	-9999	-9999	-9999	-9999
	-9999	-9999	-9999	-9999	-9999	-9999	-9999	-9999	-9999	-9999
	-9999	-9999	-9999	-9999	-9999	-9999	-9999	-9999	-9999	-9999
	-9999	-9999	-9999	-9999	-9999	-9999	-9999	-9999	-9999	-9999
	-9999	-9999	-9999	-9999	-9999	-9999	-9999	-9999	-9999	-9999
	-9999	-9999	-9999	-9999	-9999	-9999	-9999	-9999	-9999	-9999
	-9999	-9999	-9999	-9999	-9999	-9999	-9999	-9999	-9999	-9999
	-9999	-9999	-9999	-9999	-9999	-9999	-9999	-9999	-9999	-9999
	-9999	-9999	-9999	-9999	-9999	-9999	-9999	-9999	-9999	-9999
	-9999	-9999	-9999	-9999	-9999	-9999	-9999	-9999	-9999	-9999
	-9999	-9999	-9999	-9999	-9999	-9999	-9999	-9999	-9999	-9999
	-9999	-9999	-9999	-9999	-9999	-9999	-9999	-9999	-9999	-9999
2015-01-31 00:30:00	0.0107053	-2.13969	0.00546888	-2.36879	101.801	1.30998	243.394	116.606	4.4517	4.37974
2015-01-31 01:00:00	2.83943	-3.65007	2.83254	-2.47498	101.827	1.3108	235.174	124.826	2.50044	2.38847
2015-01-31 01:30:00	1.06946	-1.00598	1.06774	-2.68836	101.822	1.31176	234.94	125.06	3.25133	3.12948
2015-01-31 02:00:00	0.389724	-1.2257	0.387676	-3.06812	101.844	1.31386	241.054	118.946	1.91067	1.80154
2015-01-31 02:30:00	3.71845	-6.56074	3.70827	-3.35668	101.826	1.31503	228.357	131.643	3.27457	3.14856
2015-01-31 03:00:00	1.65087	-5.79069	1.64106	-3.4694	101.847	1.31585	227.963	132.037	3.63244	3.51884
2015-01-31 03:30:00	1.26435	-6.3682	1.25357	-3.61557	101.851	1.31661	235.784	124.216	3.18553	3.06829
2015-01-31 04:00:00	1.39019	-3.76596	1.38401	-3.88642	101.831	1.31768	250.408	109.592	3.62777	3.5693
2015-01-31 04:30:00	3.23021	-16.5905	3.203	-4.09385	101.835	1.31875	261.937	98.0633	2.91481	2.8318
2015-01-31 05:00:00	0.347802	-15.1027	0.322784	-4.47644	101.817	1.32039	272.212	87.7884	4.03865	3.99628
2015-01-31 05:30:00	-1.27851	10.273	-1.26232	-4.97872	101.818	1.32287	280.706	79.2941	4.2328	4.1497
2015-01-31 06:00:00	3.2204	-28.2612	3.17672	-5.18688	101.822	1.32394	278.386	81.614	5.29379	5.24955
2015-01-31 06:30:00	2.83783	-10.3328	2.82194	-5.35605	101.822	1.32478	274.996	85.0037	5.45605	5.41121
2015-01-31 07:00:00	3.62949	-23.3559	3.5937	-5.53944	101.835	1.32587	280.464	79.5365	4.90354	4.85776
2015-01-31 07:30:00	4.39332	-25.7917	4.35411	-5.69661	101.856	1.32691	275.009	84.9913	4.36113	4.31749
2015-01-31 08:00:00	4.12118	-19.368	4.09107	-5.78251	101.892	1.32782	273.111	86.8894	3.81195	3.76896
2015-01-31 08:30:00	3.05502	-13.0526	3.0336	-5.75988	101.946	1.32841	269.795	90.2053	2.90985	2.84467
2015-01-31 09:00:00	9.50946	-13.6245	9.48748	-5.81143	101.965	1.32893	270.539	89.4613	2.62108	2.5372
2015-01-31 09:30:00	11.3364	-7.43157	11.3251	-5.3488	101.974	1.32677	265.365	94.6346	2.37816	2.24037
2015-01-31 10:00:00	0.622759	69.0461	0.76254	-4.89538	101.938	1.32405	262.963	97.0369	2.69917	2.56113
2015-01-31 10:30:00	2.1289	47.9583	2.22076	-4.37658	101.922	1.32128	248.998	111.002	2.57706	2.47676
2015-01-31 11:00:00	5.6378	43.837	5.71358	-3.62984	101.897	1.31728	249.757	110.243	1.84163	1.72209
2015-01-31 11:30:00	-5.98492	103.46	-5.75223	-2.51688	101.863	1.31147	249.679	110.321	1.45149	1.08535
2015-01-31 12:00:00	6.44589	-2.4151	6.44254	-1.71608	101.806	1.30691	237.318	122.682	1.5838	1.15298
2015-01-31 12:30:00	3.21343	105.509	3.50322	-1.05634	101.735	1.30284	247.02	112.98	1.68135	1.31488
2015-01-31 13:00:00	2.93291	92.8415	3.20566	-0.291981	101.656	1.2982	226.001	133.999	1.38196	0.999095
2015-01-31 13:30:00	3.49319	63.6765	3.67014	0.0503245	101.566	1.2954	247.771	112.229	1.91664	1.70545
2015-01-31 14:00:00	-0.768755	120.1	-0.447871	0.510026	101.499	1.29237	263.707	96.293	1.70536	1.50765
2015-01-31 14:30:00	8.96824	78.457	9.20041	1.09745	101.459	1.28912	251.53	108.469	1.66648	1.45112
2015-01-31 15:00:00	18.38	83.6982	18.6398	1.52007	101.42	1.28664	297.703	62.2969	1.01584	0.356945
2015-01-31 15:30:00	16.8168	70.5287	17.0315	1.98761	101.405	1.28426	140.114	-140.114	1.01262	0.81269
2015-01-31 16:00:00	11.6242	37.6257	11.7407	2.16812	101.403	1.28339	151.61	-151.61	1.31378	1.0722
2015-01-31 16:30:00	10.1354	55.52	10.3066	2.30878	101.4	1.28272	129.386	-129.386	1.2766	1.1728
2015-01-31 17:00:00	-1.43039	33.4861	-1.32209	2.52672	101.4	1.28173	116.055	-116.055	1.61899	1.36997
2015-01-31 17:30:00	3.1237	40.8362	3.24221	2.22751	101.418	1.28331	122.246	-122.246	3.80916	3.70587
2015-01-31 18:00:00	10.7004	10.0436	10.7317	1.50326	101.441	1.28696	102.301	-102.301	4.01975	3.87493
2015-01-31 18:30:00	3.94992	32.9723	4.03206	1.18711	101.47	1.28879	110.139	-110.139	4.44115	4.36097
2015-01-31 19:00:00	6.07559	16.8555	6.11136	1.05706	101.504	1.28979	111.668	-111.668	3.34605	3.27186
2015-01-31 19:30:00	6.65944	30.6563	6.71209	0.894224	101.523	1.29078	106.66	-106.66	3.23607	3.11069
2015-01-31 20:00:00	4.5352	15.7155	4.56041	0.697097	101.537	1.29188	111.391	-111.391	3.48675	3.38731
2015-01-31 20:30:00	10.9206	4.71343	10.9296	0.555312	101.552	1.29272	111.236	-111.236	3.22385	3.13495
2015-01-31 21:00:00	10.174	8.69528	10.1862	0.432284	101.556	1.29333	106.569	-106.569	2.856	2.76277
2015-01-31 21:30:00	6.94395	2.22569	6.94757	0.2487	101.561	1.29426	104.37	-104.371	3.11027	3.03539
2015-01-31 22:00:00	5.20878	0.110889	5.20984	0.165609	101.566	1.2947	111.007	-111.007	2.74058	2.70096
2015-01-31 22:30:00	5.23825	5.07665	5.24286	0.0453265	101.557	1.29514	117.913	-117.913	1.96791	1.91029
2015-01-31 23:00:00	5.55641	1.44252	5.55815	-0.0764593	101.541	1.2955	144.091	-144.091	1.72318	1.70087
2015-01-31 23:30:00	1.47543	-3.1836	1.47403	-0.34351	101.531	1.29663	164.804	-164.804	1.54638	1.53768
2015-02-01	0.160854	1.55129	0.163622	-1.00329	101.542	1.30002	180.934	179.066	1.86774	1.84221
2015-02-01 00:30:00	-0.0861242	-14.438	-0.108516	-1.37403	101.558	1.30198	190.921	169.079	1.5562	1.47068
2015-02-01 01:00:00	-4.05394	3.83112	-4.05007	-1.77931	101.566	1.30401	235.021	124.979	1.62555	1.51702
2015-02-01 01:30:00	-4.29636	3.46425	-4.29292	-1.96299	101.553	1.30472	244.244	115.757	1.9282	1.88376
2015-02-01 02:00:00	-0.728072	-0.676155	-0.728879	-2.03394	101.556	1.30509	260.345	99.6548	2.84548	2.77878
2015-02-01 02:30:00	1.59545	-0.779145	1.59542	-2.55555	101.571	1.30771	276.552	83.4479	1.99638	1.96367
2015-02-01 03:00:00	5.3179	-2.10073	5.31787	-2.9598	101.585	1.30984	278.558	81.4425	1.06874	0.969846
2015-02-01 03:30:00	2.77998	-5.6954	2.77429	-3.38584	101.565	1.31174	270.439	89.5608	2.11949	2.08591
2015-02-01 04:00:00	4.1828	-10.52	4.16564	-3.56451	101.536	1.3123	269.906	90.0935	3.73358	3.70055
2015-02-01 04:30:00	5.28829	-11.1794	5.27103	-3.6784	101.515	1.31258	264.804	95.1957	3.18256	3.14919
2015-02-01 05:00:00	0.38075	-4.28816	0.374656	-3.89612	101.5	1.31343	256.107	103.893	2.69786	2.67042
2015-02-01 05:30:00	1.63805	-4.77274	1.63193	-4.016	101.478	1.31372	270.451	89.5492	2.66599	2.60834
2015-02-01 06:00:00	5.08619	-10.1424	5.07465	-4.07536	101.465	1.31383	278.193	81.8066	2.10641	2.04417
2015-02-01 06:30:00	1.54082	-5.30889	1.53356	-3.90556	101.448	1.3128	265.33	94.6703	2.47155	2.45393
2015-02-01 07:00:00	-0.971445	1.3474	-0.970037	-4.25669	101.424	1.31417	259.934	100.066	2.27087	2.25802
2015-02-01 07:30:00	2.57313	-2.77414	2.57144	-4.41978	101.445	1.31521	251.023	108.977	1.60354	1.57842
2015-02-01 08:00:00	4.52965	-0.753595	4.52967	-4.61116	101.491	1.31672	257.345	102.655	2.67906	2.64661
	-9999	-9999	-9999	-9999	-9999	-9999	-9999	-9999	-9999	-9999
	-9999	-9999	-9999	-9999	-9999	-9999	-9999	-9999	-9999	-9999
	-9999	-9999	-9999	-9999	-9999	-9999	-9999	-9999	-9999	-9999
	-9999	-9999	-9999	-9999	-9999	-9999	-9999	-9999	-9999	-9999
	-9999	-9999	-9999	-9999	-9999	-9999	-9999	-9999	-9999	-9999
	-9999	-9999	-9999	-9999	-9999	-9999	-9999	-9999	-9999	-9999
	-9999	-9999	-9999	-9999	-9999	-9999	-9999	-9999	-9999	-9999
	-9999	-9999	-9999	-9999	-9999	-9999	-9999	-9999	-9999	-9999
	-9999	-9999	-9999	-9999	-9999	-9999	-9999	-9999	-9999	-9999
	-9999	-9999	-9999	-9999	-9999	-9999	-9999	-9999	-9999	-9999
2015-02-01 13:30:00	3.84374	71.8782	3.99775	0.372347	101.278	1.29013	30.5557	-30.5557	1.65217	1.34728
2015-02-01 14:00:00	12.2386	110.635	12.4887	0.787862	101.219	1.28747	57.7428	-57.7428	1.59284	1.3436
2015-02-01 14:30:00	8.6464	103.533	8.86092	1.12588	101.165	1.28518	46.8407	-46.8407	2.47348	2.32868
2015-02-01 15:00:00	-0.0528466	70.918	0.0815754	1.62554	101.127	1.28234	38.8964	-38.8964	2.13298	1.85225
2015-02-01 15:30:00	-8.3281	108.834	-8.14149	1.92148	101.105	1.28067	42.7944	-42.7944	1.91478	1.64889
2015-02-01 16:00:00	-2.26569	63.7106	-2.1833	1.96545	101.101	1.28038	43.4372	-43.4373	2.50623	2.25977
2015-02-01 16:30:00	-5.46822	50.151	-5.43809	2.03844	101.105	1.28002	46.0292	-46.0292	2.42812	2.29253
2015-02-01 17:00:00	-6.18535	38.8228	-6.17755	2.0131	101.099	1.28003	42.089	-42.089	2.2307	2.08946
2015-02-01 17:30:00	6.76029	30.7797	6.75982	1.89793	101.098	1.28054	46.9469	-46.9469	2.87375	2.78719
2015-02-01 18:00:00	-9.04993	21.9051	-9.05778	1.78387	101.114	1.28123	49.8194	-49.8194	2.80716	2.75824
2015-02-01 18:30:00	-5.24721	4.33906	-5.24934	1.56976	101.139	1.28253	49.0151	-49.0151	2.95052	2.9118
2015-02-01 19:00:00	-3.82949	18.4569	-3.84932	1.54792	101.171	1.283	65.9753	-65.9753	2.37522	2.29855
2015-02-01 19:30:00	4.04366	8.09959	4.03378	1.48885	101.192	1.28353	77.2313	-77.2313	1.98729	1.92313
2015-02-01 20:00:00	9.80585	7.91381	9.79392	1.53185	101.216	1.28363	83.6541	-83.6541	1.71728	1.64577
2015-02-01 20:30:00	14.627	8.32434	14.6186	1.48956	101.231	1.28406	73.5378	-73.5378	1.70816	1.64736
2015-02-01 21:00:00	6.04214	4.4682	6.03766	1.38014	101.236	1.28464	76.9379	-76.9379	1.89644	1.82192
2015-02-01 21:30:00	6.70008	6.10843	6.6927	1.26713	101.248	1.28529	71.1067	-71.1067	1.44379	1.39753
2015-02-01 22:00:00	3.62368	-0.707006	3.62373	1.15034	101.26	1.28598	68.152	-68.152	1.3665	1.32736
2015-02-01 22:30:00	4.48035	-1.29933	4.48093	1.04167	101.261	1.2865	67.8604	-67.8604	0.939177	0.878783
2015-02-01 23:00:00	1.9144	2.56714	1.91079	0.993483	101.259	1.28669	85.8867	-85.8867	1.24944	1.20606
2015-02-01 23:30:00	5.11492	3.77803	5.10896	0.99041	101.243	1.28651	89.6996	-89.6997	0.903841	0.870229
2015-02-02	4.57752	-8.42561	4.58913	0.846241	101.243	1.28715	92.4175	-92.4175	1.02513	0.94224
2015-02-02 00:30:00	0.783062	-2.13467	0.786348	0.655802	101.228	1.28786	83.2265	-83.2265	0.660523	0.581739
2015-02-02 01:00:00	-15.8709	53.7892	-15.9765	0.127279	101.228	1.29031	49.4812	-49.4812	0.387592	0.110819
2015-02-02 01:30:00	0.636438	-1.13832	0.637621	-0.5077	101.234	1.29347	213.052	146.948	0.454114	0.394659
2015-02-02 02:00:00	0.130033	-9.31459	0.132267	-0.725115	101.245	1.29472	210.887	149.113	0.641324	0.574533
2015-02-02 02:30:00	-8.20031	4.37521	-8.20573	-1.21456	101.271	1.29724	235.732	124.268	0.58096	0.508971
2015-02-02 03:00:00	-0.295629	-11.478	-0.269521	-1.69497	101.268	1.29947	239.254	120.746	0.885854	0.810668
2015-02-02 03:30:00	-2.20146	-6.34662	-2.18779	-2.25515	101.259	1.30205	232.704	127.296	0.865886	0.780709
2015-02-02 04:00:00	-1.10971	-2.63155	-1.10506	-2.60604	101.238	1.30351	250.188	109.812	2.02436	1.99394
2015-02-02 04:30:00	1.32579	-2.16118	1.32739	-2.73387	101.221	1.30398	257.574	102.426	2.29288	2.26717
2015-02-02 05:00:00	9.55787	3.91203	9.55613	-2.89454	101.212	1.30468	267.121	92.8791	2.43308	2.39262
2015-02-02 05:30:00	1.8799	-2.39513	1.88031	-3.09718	101.217	1.30574	261.43	98.5701	2.47979	2.45509
2015-02-02 06:00:00	4.13922	-3.90254	4.14023	-3.15266	101.192	1.30567	269.103	90.8968	2.29962	2.25036
2015-02-02 06:30:00	12.0046	-6.90408	12.0092	-3.30118	101.174	1.3061	263.133	96.8673	2.56212	2.53209
2015-02-02 07:00:00	4.463	-2.76277	4.46478	-3.3378	101.178	1.30633	260.856	99.1438	2.92894	2.87937
2015-02-02 07:30:00	9.56166	-8.93513	9.56868	-3.45034	101.178	1.30688	267.769	92.2309	2.76861	2.71651
2015-02-02 08:00:00	8.91986	3.02793	8.91608	-3.5811	101.2	1.30781	251.816	108.184	2.10198	2.07255
2015-02-02 08:30:00	-6.88911	-4.525	-6.88736	-3.78469	101.22	1.3091	252.916	107.084	2.1984	2.16238
2015-02-02 09:00:00	4.14289	4.76674	4.14258	-4.03233	101.264	1.3109	246.764	113.236	2.11166	2.03993
2015-02-02 09:30:00	3.7171	19.2674	3.71674	-3.90443	101.28	1.31049	252.173	107.827	2.09122	2.03609
2015-02-02 10:00:00	14.4097	34.0904	14.3969	-3.63197	101.256	1.30882	270.259	89.7406	2.15094	2.0967
2015-02-02 10:30:00	5.70454	-3.5702	5.70373	-3.19561	101.256	1.30677	271.359	88.6414	3.38648	3.3353
2015-02-02 11:00:00	14.1058	133.386	14.1837	-2.43239	101.273	1.30332	277.99	82.0095	2.56608	2.4481
2015-02-02 11:30:00	3.82009	88.011	3.86617	-1.64686	101.253	1.2993	282.711	77.2888	1.50598	1.28053
2015-02-02 12:00:00	-1.52008	-6.4139	-1.5233	-1.16688	101.213	1.29648	294.489	65.5108	1.4409	1.26068
2015-02-02 12:30:00	-0.787893	56.3377	-0.765946	-0.77219	101.174	1.29409	293.737	66.2629	1.53615	1.38327
2015-02-02 13:00:00	-1.10668	53.5524	-1.10037	-0.242494	101.128	1.29097	308.241	51.7589	1.32905	1.18893
2015-02-02 13:30:00	1.89914	61.9187	1.89447	0.0833019	101.074	1.28873	292.747	67.2533	1.38675	1.25584
2015-02-02 14:00:00	3.92241	38.8724	3.919	0.569405	101.029	1.28587	324.642	35.3578	1.10505	0.932243
2015-02-02 14:30:00	-6.34988	40.4169	-6.38113	1.02628	101.013	1.28346	339.433	20.5669	1.24079	0.964234
2015-02-02 15:00:00	-10.2452	24.4247	-10.2607	1.52937	100.992	1.28085	341.906	18.0943	1.11891	0.834617
2015-02-02 15:30:00	-4.04934	0.896974	-4.04952	1.81489	100.987	1.27941	340.757	19.2432	1.45454	1.24542
2015-02-02 16:00:00	11.5142	19.9908	11.4858	2.05489	100.981	1.27821	313.925	46.0749	1.48367	1.35799
2015-02-02 16:30:00	18.5392	20.9456	18.501	2.27155	100.968	1.27701	319.16	40.8396	1.58561	1.35038
2015-02-02 17:00:00	6.41661	11.9721	6.39642	2.14796	100.978	1.27772	269.932	90.0676	1.4966	1.42501
2015-02-02 17:30:00	2.60429	5.28962	2.59443	2.16801	101.002	1.27792	262.807	97.1933	1.1083	0.976794
2015-02-02 18:00:00	3.60665	17.8754	3.57063	2.00893	101.01	1.27873	265.494	94.5058	2.14582	2.10044
2015-02-02 18:30:00	24.3787	17.5995	24.3321	1.85977	101.026	1.27962	281.427	78.5733	2.59299	2.5075
2015-02-02 19:00:00	-2.67183	3.03341	-2.67775	1.82988	101.062	1.2802	299.955	60.0446	1.47042	1.40182
2015-02-02 19:30:00	16.8685	-14.4064	16.8897	2.15465	101.096	1.27915	99.6819	-99.6819	1.99182	1.56256
2015-02-02 20:00:00	10.4542	23.9068	10.4129	2.24466	101.116	1.27901	110.304	-110.304	4.1223	4.02272
2015-02-02 20:30:00	52.6781	18.9325	52.5522	1.83613	101.137	1.28093	105.086	-105.086	5.02217	4.87979
2015-02-02 21:00:00	37.5284	19.9824	37.2079	0.583435	101.194	1.28685	113.769	-113.769	4.73425	4.61763
2015-02-02 21:30:00	-9.44237	29.7052	-9.87264	-0.349086	101.235	1.29147	121.017	-121.017	4.74742	4.56937
2015-02-02 22:00:00	23.5732	21.7506	23.1243	-0.8454	101.244	1.29378	120.519	-120.519	4.6843	4.51408
2015-02-02 22:30:00	2.17366	24.9936	1.74868	-0.922759	101.231	1.29402	105.507	-105.507	3.35026	3.23158
2015-02-02 23:00:00	6.88864	5.83406	6.77876	-0.721162	101.204	1.29283	101.898	-101.898	2.67509	2.61311
2015-02-02 23:30:00	67.5365	3.15986	67.3025	-0.471418	101.182	1.2914	109.111	-109.111	2.5907	2.48903
2015-02-03	12.0086	12.4161	11.7812	-0.364509	101.177	1.29078	120.359	-120.359	3.16186	3.06154
2015-02-03 00:30:00	1.91088	9.01892	1.76796	-0.164467	101.16	1.28966	123.338	-123.338	2.99123	2.81288
2015-02-03 01:00:00	4.08007	-3.43364	4.11984	0.0372428	101.137	1.28845	155.09	-155.09	1.89678	1.87026
2015-02-03 01:30:00	2.85723	-1.79498	2.8748	0.452853	101.112	1.28627	162.955	-162.955	1.89772	1.85733
2015-02-03 02:00:00	0.978687	-1.1155	0.991525	0.448463	101.117	1.28635	178.613	-178.613	1.30997	1.27221
2015-02-03 02:30:00	7.90396	-0.706874	7.89505	0.355769	101.116	1.28689	196.495	163.505	0.88077	0.851279
2015-02-03 03:00:00	-2.09716	-0.973547	-2.08378	0.343231	101.103	1.287	197.768	162.232	0.694646	0.660409
2015-02-03 03:30:00	-3.337	-1.6565	-3.31442	0.262137	101.083	1.28713	202.067	157.933	0.546336	0.504013
2015-02-03 04:00:00	-4.04117	-1.09872	-4.02633	0.294864	101.071	1.28698	194.254	165.746	0.666067	0.635337
2015-02-03 04:30:00	-20.5428	3.15142	-20.5386	0.35454	101.061	1.28663	179.477	-179.477	0.898332	0.868392
2015-02-03 05:00:00	-20.8489	2.48897	-20.841	0.479414	101.054	1.28608	161.978	-161.978	1.28917	1.282
2015-02-03 05:30:00	18.4547	-3.53332	18.4566	0.375468	101.043	1.28609	157.421	-157.421	1.0255	1.01507
2015-02-03 06:00:00	-13.4017	-11.1989	-13.2184	-0.150131	101.026	1.28804	224.298	135.702	0.842395	0.701192
2015-02-03 06:30:00	-4.98619	6.11426	-5.05947	-0.631324	101.035	1.29038	239.188	120.812	0.50262	0.352324
2015-02-03 07:00:00	-2.99613	0.0679044	-2.98992	-0.449405	101.048	1.28976	137.951	-137.951	0.946256	0.859972
2015-02-03 07:30:00	-1.29521	-0.845485	-1.28198	-0.413282	101.086	1.29015	162.876	-162.876	1.48859	1.47472
2015-02-03 08:00:00	-2.27504	0.00644829	-2.26972	-0.505742	101.123	1.29099	151.763	-151.763	0.782882	0.761063
2015-02-03 08:30:00	-2.03907	0.910172	-2.04608	-0.395908	101.159	1.29094	142.566	-142.566	1.27186	1.22539
2015-02-03 09:00:00	0.457072	-1.44677	0.473437	-0.31276	101.169	1.29076	149.157	-149.157	1.14067	1.06753
2015-02-03 09:30:00	5.24251	-6.74502	5.30982	-0.116972	101.153	1.28966	165.025	-165.025	0.894405	0.854641
2015-02-03 10:00:00	10.5299	3.09276	10.4729	0.195739	101.118	1.28775	206.944	153.056	0.615524	0.534556
2015-02-03 10:30:00	13.8602	12.0367	13.6997	0.759332	101.103	1.28495	209.896	150.104	1.25168	1.13732
2015-02-03 11:00:00	8.75459	9.19785	8.65534	1.84659	101.094	1.27992	216.861	143.139	2.02238	1.90179
2015-02-03 11:30:00	9.30333	14.5561	9.15174	2.92125	101.086	1.27482	208.216	151.784	2.46049	2.3096
2015-02-03 12:00:00	19.339	0.377104	19.3079	3.85787	101.059	1.27029	199.642	160.358	3.26111	3.11241
2015-02-03 12:30:00	22.8079	-37.9478	23.0546	4.79873	101.013	1.26547	190.918	169.082	2.96111	2.79972
2015-02-03 13:00:00	8.11977	49.5781	7.8242	5.66422	100.966	1.26107	195.706	164.294	5.71996	5.55354
2015-02-03 13:30:00	-1.81968	46.0629	-2.09097	5.91554	100.924	1.25941	197.423	162.577	5.21216	5.02291
2015-02-03 14:00:00	-0.758105	56.9234	-1.11504	6.11541	100.885	1.25798	194.736	165.264	5.28411	5.10065
2015-02-03 14:30:00	4.19954	51.6786	3.88404	6.32888	100.858	1.25671	193.301	166.699	6.43831	6.29234
2015-02-03 15:00:00	-4.21904	66.8131	-4.56686	6.65382	100.836	1.25505	190.496	169.504	5.23003	4.9996
2015-02-03 15:30:00	-7.03731	53.8204	-7.31236	6.84431	100.825	1.25406	189.04	170.96	5.34929	5.13148
2015-02-03 16:00:00	16.5226	53.591	16.2396	6.84812	100.819	1.25398	187.542	172.458	6.37669	6.19878
2015-02-03 16:30:00	-5.17584	55.3774	-5.40476	6.93325	100.819	1.25367	190.828	169.172	5.26434	5.03693
2015-02-03 17:00:00	0.896883	21.2445	0.834897	6.8742	100.809	1.25393	191.303	168.697	5.3686	5.18848
2015-02-03 17:30:00	7.92874	8.45114	7.9083	6.73015	100.81	1.25466	191.173	168.827	4.84428	4.61336
2015-02-03 18:00:00	9.0758	0.0449143	9.07349	6.47094	100.835	1.2562	186.307	173.693	2.93405	2.78254
2015-02-03 18:30:00	3.01162	-12.1172	3.01589	6.15815	100.847	1.25784	193.635	166.365	4.36062	4.18417
2015-02-03 19:00:00	-0.16559	-10.3507	-0.162273	5.9494	100.869	1.25906	196.587	163.413	4.30892	4.1391
2015-02-03 19:30:00	1.98015	-6.20558	1.98433	5.76038	100.886	1.26009	193.197	166.803	4.84375	4.65578
2015-02-03 20:00:00	2.00277	-3.86749	2.00489	5.46715	100.908	1.26171	187.96	172.04	4.80971	4.6411
2015-02-03 20:30:00	4.38289	-18.6465	4.39347	5.11594	100.947	1.26378	197.287	162.713	4.1113	3.86867
2015-02-03 21:00:00	-1.78881	7.72891	-1.79714	4.29877	100.979	1.26786	201.379	158.621	5.93855	5.70783
2015-02-03 21:30:00	2.43553	2.01202	2.43083	3.49803	101.036	1.27218	198.911	161.089	6.1333	5.91219
2015-02-03 22:00:00	0.311234	3.91818	0.30317	2.78055	101.079	1.27603	199.375	160.625	5.72121	5.50975
2015-02-03 22:30:00	2.96623	12.732	2.94491	1.92074	101.124	1.28061	204.286	155.714	5.99025	5.74242
2015-02-03 23:00:00	-8.23547	35.8724	-8.30102	1.09818	101.168	1.28499	204.551	155.449	5.07372	4.78262
2015-02-03 23:30:00	3.71967	19.4444	3.68081	0.292159	101.176	1.28888	206.342	153.658	4.52091	4.23107
2015-02-04	6.95628	-9.98972	6.97436	-0.189129	101.2	1.29144	210.358	149.642	3.64946	3.42754
2015-02-04 00:30:00	7.07102	-1.30869	7.07107	-0.478573	101.193	1.29275	215.22	144.78	5.45641	5.25094
2015-02-04 01:00:00	1.66003	9.41794	1.64363	-0.793162	101.202	1.29437	219.349	140.651	4.71153	4.51676
2015-02-04 01:30:00	2.94709	-4.69747	2.95507	-0.914758	101.172	1.29455	216.219	143.781	3.96341	3.7118
2015-02-04 02:00:00	3.83618	-0.467331	3.83573	-1.01005	101.176	1.29504	223.784	136.216	4.9099	4.75451
2015-02-04 02:30:00	4.9281	-6.97545	4.94076	-1.09529	101.18	1.29549	222.204	137.796	4.42897	4.27173
2015-02-04 03:00:00	4.11806	-5.86236	4.12858	-1.24704	101.166	1.29604	217.23	142.77	4.86308	4.65315
2015-02-04 03:30:00	4.41092	-6.16349	4.42161	-1.3662	101.143	1.29632	217.018	142.982	6.23577	6.03487
2015-02-04 04:00:00	4.4541	3.24587	4.4459	-1.52438	101.148	1.29714	218.884	141.116	4.95644	4.74142
2015-02-04 04:30:00	2.73311	-8.71426	2.74979	-1.72272	101.148	1.29808	224.388	135.612	5.72873	5.56088
2015-02-04 05:00:00	4.55727	1.11241	4.55358	-1.85762	101.159	1.29888	221.505	138.495	5.92973	5.74862
2015-02-04 05:30:00	4.57402	-7.72959	4.5864	-2.00718	101.182	1.29991	213.277	146.723	4.71008	4.57216
2015-02-04 06:00:00	4.21506	-4.63427	4.22149	-2.07083	101.174	1.30012	219.439	140.561	5.60818	5.42965
2015-02-04 06:30:00	3.04668	-5.77332	3.05441	-2.05247	101.151	1.29975	223.673	136.327	7.59344	7.41359
2015-02-04 07:00:00	3.18439	1.15771	3.18189	-2.06732	101.169	1.30006	224.505	135.495	6.56369	6.40401
2015-02-04 07:30:00	3.66061	-6.07756	3.66847	-2.1041	101.177	1.30032	225.22	134.78	5.26601	5.11299
2015-02-04 08:00:00	2.7807	-3.95002	2.78535	-2.05788	101.159	1.29988	220.338	139.662	5.68201	5.52862
2015-02-04 08:30:00	5.03898	-3.71676	5.04224	-1.95691	101.176	1.29964	221.483	138.517	5.566	5.42851
2015-02-04 09:00:00	4.34422	2.24543	4.34142	-1.87849	101.169	1.29919	224.802	135.198	6.32706	6.18062
2015-02-04 09:30:00	3.92687	5.08116	3.92165	-1.71374	101.157	1.29826	232.098	127.902	4.13688	3.97561
2015-02-04 10:00:00	5.4466	0.0160483	5.44592	-0.909304	101.159	1.29446	229.924	130.076	2.98985	2.73896
2015-02-04 10:30:00	0.642241	73.5746	0.620138	-0.242131	101.138	1.29106	222.381	137.619	3.86426	3.68412
2015-02-04 11:00:00	6.15874	86.0585	6.135	0.549585	101.121	1.28712	199.45	160.55	4.14248	3.94865
2015-02-04 11:30:00	4.17533	35.6075	4.16441	0.771348	101.119	1.28604	195.467	164.533	5.04099	4.80586
2015-02-04 12:00:00	2.9984	33.2839	2.98743	0.964407	101.083	1.28468	197.81	162.19	4.10216	3.90625
2015-02-04 12:30:00	3.52826	45.6891	3.51016	1.3455	101.012	1.28198	198.672	161.328	4.00378	3.83894
2015-02-04 13:00:00	2.65427	30.6657	2.64081	1.51077	100.939	1.28029	198.904	161.096	3.76475	3.60639
2015-02-04 13:30:00	1.12558	36.4934	1.10644	1.88169	100.889	1.27792	207.571	152.429	2.19427	1.99713
2015-02-04 14:00:00	2.40544	59.9318	2.38267	2.54819	100.821	1.27398	195.007	164.993	3.50576	3.34164
2015-02-04 14:30:00	1.26673	140.185	1.22265	3.60871	100.743	1.26812	208.159	151.841	3.89529	3.64595
2015-02-04 15:00:00	-1.08901	34.8543	-1.10572	4.27206	100.701	1.26455	200.495	159.505	5.74689	5.47958
2015-02-04 15:30:00	2.48916	54.3028	2.44797	4.69199	100.682	1.26237	194.641	165.359	7.86572	7.65726
2015-02-04 16:00:00	6.22641	66.3932	6.15912	5.01163	100.686	1.26096	190.833	169.167	6.86239	6.64416
2015-02-04 16:30:00	2.18418	37.8192	2.13374	5.05257	100.703	1.26096	191.718	168.282	7.89797	7.6956
2015-02-04 17:00:00	0.492091	22.3798	0.452861	5.1335	100.729	1.26087	194.44	165.56	6.06742	5.81953
2015-02-04 17:30:00	4.98046	30.329	4.91848	5.01521	100.762	1.26181	220.264	139.736	5.38077	5.07164
2015-02-04 18:00:00	3.53278	31.8601	3.47333	3.97493	100.782	1.26683	224.313	135.687	8.30769	8.01027
2015-02-04 18:30:00	4.86622	3.85876	4.85614	3.39804	100.861	1.27043	228.321	131.679	8.59503	8.30585
2015-02-04 19:00:00	2.48441	12.7223	2.45323	2.8732	100.94	1.27383	231.953	128.047	8.67245	8.3416
2015-02-04 19:30:00	3.20097	-9.973	3.22459	2.44499	100.995	1.27653	232.469	127.531	9.16093	8.82546
2015-02-04 20:00:00	0.966922	0.434047	0.965363	2.09652	101.074	1.27909	238.48	121.52	8.49225	8.25068
2015-02-04 20:30:00	1.15898	5.35152	1.14402	1.78816	101.114	1.28101	237.621	122.379	7.63013	7.35677
2015-02-04 21:00:00	0.0819896	0.345529	0.0809353	1.48168	101.162	1.28304	240.892	119.108	7.81938	7.61039
2015-02-04 21:30:00	-0.521834	2.41202	-0.529023	1.18019	101.201	1.28493	247.095	112.906	8.49986	8.33182
2015-02-04 22:00:00	-0.0746801	-4.83568	-0.0595619	0.96087	101.22	1.28618	243.214	116.786	8.27715	8.11151
2015-02-04 22:30:00	1.45232	-3.56249	1.4625	0.845754	101.256	1.2872	243.732	116.269	6.83478	6.6834
2015-02-04 23:00:00	1.66109	-4.33417	1.67337	0.827133	101.288	1.28769	241.842	118.158	4.87703	4.72841
2015-02-04 23:30:00	2.44316	-6.88449	2.46227	0.828583	101.309	1.28795	238.985	121.015	5.34536	5.18389
2015-02-05	1.45949	-4.81712	1.47319	0.722149	101.33	1.28872	241.561	118.439	4.79936	4.65983
2015-02-05 00:30:00	0.729023	-5.81248	0.746206	0.679977	101.329	1.2889	236.661	123.339	5.5285	5.36777
2015-02-05 01:00:00	1.11375	-5.04044	1.12897	0.520225	101.337	1.28975	235.287	124.713	4.30431	4.14503
2015-02-05 01:30:00	2.75392	-12.7566	2.79297	0.443966	101.342	1.29017	227.124	132.876	4.43435	4.29995
2015-02-05 02:00:00	2.16365	-11.1669	2.19848	0.423272	101.344	1.29028	228.569	131.431	4.4579	4.33186
2015-02-05 02:30:00	0.801415	-5.71004	0.819987	0.364	101.314	1.29018	234.861	125.139	4.47178	4.33313
2015-02-05 03:00:00	-0.0110257	-1.82748	-0.0047742	0.175527	101.308	1.29098	239.732	120.268	4.32859	4.22022
2015-02-05 03:30:00	-0.101419	-8.44155	-0.0710995	0.0285511	101.313	1.29173	237.198	122.802	3.23742	3.11131
2015-02-05 04:00:00	-0.368394	-1.78692	-0.36188	-0.0689176	101.279	1.29176	237.289	122.711	5.08695	4.97183
2015-02-05 04:30:00	-3.32109	-19.5508	-3.24545	-0.0943793	101.256	1.29156	244.75	115.25	4.34732	4.22207
2015-02-05 05:00:00	-0.388115	-12.4927	-0.338211	-0.0708327	101.266	1.29157	241.62	118.38	4.64755	4.51011
2015-02-05 05:30:00	1.18416	-15.3739	1.24675	-0.186103	101.256	1.29197	237.815	122.185	5.88663	5.73455
2015-02-05 06:00:00	1.45393	-12.068	1.50392	-0.228732	101.23	1.29183	232.71	127.29	5.79792	5.62996
2015-02-05 06:30:00	1.40909	-10.8756	1.45504	-0.300362	101.246	1.29236	239.565	120.434	4.14852	3.98086
2015-02-05 07:00:00	1.69473	-8.55834	1.73145	-0.367427	101.266	1.29292	240.715	119.284	2.24367	2.0894
2015-02-05 07:30:00	1.67217	-5.11461	1.69434	-0.407113	101.27	1.29315	225.419	134.581	1.90284	1.76508
2015-02-05 08:00:00	1.68643	-8.8755	1.72536	-0.363206	101.293	1.29324	242.69	117.311	1.84051	1.72352
2015-02-05 08:30:00	0.963332	-10.8047	1.00864	-0.167593	101.288	1.29227	226.88	133.12	2.33721	2.23387
2015-02-05 09:00:00	1.37189	6.29971	1.34311	-0.294619	101.307	1.29311	162.503	-162.503	1.06626	0.785428
2015-02-05 09:30:00	2.03643	27.0263	1.92566	0.462192	101.298	1.28945	199.134	160.866	0.765501	0.558176
2015-02-05 10:00:00	9.16135	29.5618	9.04575	0.753005	101.279	1.28787	180.337	179.663	1.15456	0.932595
2015-02-05 10:30:00	7.94129	24.0737	7.85131	1.175	101.269	1.28577	162.951	-162.951	1.15505	0.794445
2015-02-05 11:00:00	14.8677	93.2552	14.5765	1.8633	101.244	1.28229	195.629	164.371	1.05573	0.818447
2015-02-05 11:30:00	2.04919	21.8161	1.98496	2.4691	101.211	1.27906	189.475	170.525	1.28361	1.00597
2015-02-05 12:00:00	3.48148	96.9615	3.19276	2.85942	101.166	1.27667	188.309	171.691	2.17796	1.94059
2015-02-05 12:30:00	3.1345	85.2187	2.87161	3.19271	101.11	1.27442	177.011	-177.011	2.64777	2.49926
2015-02-05 13:00:00	2.9049	141.762	2.47824	3.52833	101.041	1.27201	156.922	-156.922	2.57534	2.37294
2015-02-05 13:30:00	4.53362	155.022	4.00681	3.95882	100.974	1.26916	78.9013	-78.9013	1.98495	1.75359
2015-02-05 14:00:00	-23.9785	140.988	-24.4872	4.36976	100.918	1.26655	127.844	-127.844	2.64257	2.40371
2015-02-05 14:30:00	6.06897	168.147	5.36141	4.47937	100.858	1.26525	128.349	-128.349	3.30577	3.11303
2015-02-05 15:00:00	5.60848	141.588	5.07249	5.04972	100.806	1.26205	133.65	-133.65	2.76855	2.54242
2015-02-05 15:30:00	6.97694	145.562	6.39294	5.37623	100.782	1.26025	121.477	-121.477	2.84238	2.63792
2015-02-05 16:00:00	4.76895	48.1283	4.59202	5.61005	100.755	1.25889	125.306	-125.306	2.98266	2.89261
2015-02-05 16:30:00	4.54268	38.4738	4.39267	5.98962	100.729	1.25683	130.801	-130.801	3.30744	3.21418
2015-02-05 17:00:00	14.8187	33.8898	14.6755	6.17852	100.708	1.25571	116.925	-116.925	3.63564	3.58363
2015-02-05 17:30:00	5.59982	14.3422	5.53632	6.2908	100.704	1.25513	111.794	-111.794	3.57203	3.48814
2015-02-05 18:00:00	5.63024	5.47037	5.60386	6.11189	100.707	1.25598	112.008	-112.008	3.93867	3.87816
2015-02-05 18:30:00	11.9614	-2.24466	11.9615	5.81485	100.704	1.2573	112.16	-112.16	4.66055	4.59477
2015-02-05 19:00:00	9.12726	-0.66674	9.12325	5.62501	100.705	1.25815	111.171	-111.171	4.77625	4.69618
2015-02-05 19:30:00	11.1302	-3.90694	11.1375	5.54273	100.709	1.25858	112.449	-112.449	5.07816	5.02066
2015-02-05 20:00:00	6.75005	-10.7772	6.78769	5.52579	100.703	1.25859	120.99	-120.99	4.77992	4.72033
2015-02-05 20:30:00	6.91744	-10.5665	6.95206	5.48693	100.707	1.25883	121.188	-121.188	5.22728	5.17612
2015-02-05 21:00:00	9.23194	-14.3023	9.28144	5.35847	100.703	1.25934	120.66	-120.66	5.49345	5.45087
2015-02-05 21:30:00	8.52142	-21.5245	8.59967	5.29634	100.685	1.25939	122.374	-122.374	6.28252	6.24912
2015-02-05 22:00:00	4.50384	-12.9488	4.55327	5.16681	100.679	1.25989	120.039	-120.039	5.57037	5.53383
2015-02-05 22:30:00	3.27026	-16.3159	3.32749	5.19409	100.66	1.25957	122.48	-122.48	5.76748	5.72632
2015-02-05 23:00:00	3.15305	-6.63137	3.17495	5.32966	100.626	1.25853	122.862	-122.862	5.33317	5.29037
2015-02-05 23:30:00	2.19471	-4.63796	2.20942	5.38254	100.602	1.25801	125.374	-125.374	5.48541	5.46495
2015-02-06	1.99032	-5.95048	2.01248	5.05406	100.596	1.25938	139.456	-139.456	3.36814	3.24002
2015-02-06 00:30:00	-3.27206	21.7859	-3.35643	5.28483	100.573	1.25804	149.899	-149.899	3.15231	3.14144
2015-02-06 01:00:00	-0.451712	-14.1833	-0.391595	5.46493	100.543	1.25684	129.444	-129.444	1.14823	1.10389
2015-02-06 01:30:00	-1.41783	10.6599	-1.46258	5.23265	100.514	1.25752	154.793	-154.793	0.401709	0.278011
2015-02-06 02:00:00	1.49691	-8.23411	1.53249	5.13089	100.5	1.25778	104.698	-104.698	0.688486	0.600697
2015-02-06 02:30:00	-0.160531	0.767842	-0.163836	4.96518	100.477	1.25824	162.371	-162.371	0.495633	0.299158
2015-02-06 03:00:00	-0.120864	-0.901218	-0.116474	4.83208	100.42	1.25811	246.914	113.086	1.48841	1.44455
2015-02-06 03:30:00	-0.695064	-3.47032	-0.676986	4.65371	100.37	1.25826	239.866	120.134	1.50302	1.42982
2015-02-06 04:00:00	-0.0690884	-2.01495	-0.0586222	4.3907	100.322	1.25884	236.314	123.686	1.26512	1.19363
2015-02-06 04:30:00	-1.43067	-3.37224	-1.41081	4.25324	100.28	1.25891	239.103	120.897	2.09448	2.02659
2015-02-06 05:00:00	-2.8552	4.6577	-2.87613	3.88064	100.261	1.26041	241.101	118.899	2.14386	2.08397
2015-02-06 05:30:00	1.0529	-2.88603	1.06799	3.59532	100.251	1.26152	230.452	129.548	1.49639	1.39562
2015-02-06 06:00:00	-1.31621	2.23298	-1.32749	3.2597	100.24	1.26292	220.507	139.493	0.973006	0.882175
2015-02-06 06:30:00	-0.781171	-3.45777	-0.761317	2.99688	100.234	1.26406	222.068	137.932	0.972342	0.883591
2015-02-06 07:00:00	-2.50582	-9.72759	-2.45136	2.89622	100.224	1.26441	222.992	137.008	1.37014	1.27701
2015-02-06 07:30:00	-0.588793	-5.31551	-0.559247	2.69409	100.242	1.26555	219.09	140.91	1.43764	1.33738
2015-02-06 08:00:00	7.21288	-6.58146	7.23972	2.98352	100.242	1.26425	216.646	143.354	2.24836	2.12776
2015-02-06 08:30:00	2.92603	-6.86132	2.9537	2.8362	100.246	1.26505	209.595	150.405	2.11152	2.03769
2015-02-06 09:00:00	-0.885742	4.70886	-0.906402	2.65508	100.257	1.26601	223.371	136.629	2.34035	2.21563
2015-02-06 09:30:00	2.88649	-2.6612	2.89677	2.43231	100.26	1.26704	237.167	122.833	2.62456	2.52971
2015-02-06 10:00:00	5.48878	-17.8891	5.56759	2.8524	100.261	1.26513	228.573	131.427	2.23832	2.10317
2015-02-06 10:30:00	4.4249	-11.4015	4.47676	3.25707	100.249	1.2631	231.034	128.966	2.43735	2.31242
2015-02-06 11:00:00	9.21961	-12.5624	9.2749	4.18338	100.236	1.25871	221.01	138.99	1.25654	1.12814
2015-02-06 11:30:00	9.93231	5.13983	9.89946	5.32525	100.201	1.25314	218.631	141.369	1.26323	1.14448
2015-02-06 12:00:00	0.979495	12.3655	0.928933	6.15216	100.154	1.2489	247.288	112.712	1.2918	1.18425
2015-02-06 12:30:00	8.95604	15.1627	8.89349	6.97251	100.094	1.24453	233.316	126.684	0.949338	0.669558
2015-02-06 13:00:00	0.198286	10.9615	0.161737	7.30104	100.038	1.24241	265.051	94.9493	0.950866	0.69461
2015-02-06 13:30:00	-10.1754	57.9298	-10.3564	7.81823	99.9954	1.2396	180.146	179.854	1.24419	0.994709
2015-02-06 14:00:00	33.9673	131.991	33.417	8.17309	99.959	1.23752	125.515	-125.515	1.48238	1.2765
2015-02-06 14:30:00	3.69218	53.0269	3.51042	8.4807	99.9194	1.23573	136.189	-136.189	1.38397	1.24413
2015-02-06 15:00:00	-6.20605	51.987	-6.36841	8.81287	99.8916	1.23395	124.005	-124.005	2.46358	2.32088
2015-02-06 15:30:00	35.1731	57.2687	34.9456	8.98133	99.8758	1.23298	120.613	-120.613	2.81144	2.71496
2015-02-06 16:00:00	11.337	17.166	11.2509	8.64107	99.8722	1.23435	120.605	-120.605	3.63575	3.59411
2015-02-06 16:30:00	10.1012	41.2848	9.9047	8.28214	99.8689	1.23588	114.692	-114.692	4.25318	4.17828
2015-02-06 17:00:00	11.5698	27.4843	11.4373	8.11082	99.8731	1.23669	105.316	-105.316	4.26072	4.18705
2015-02-06 17:30:00	7.57479	6.28988	7.54114	7.89706	99.8839	1.23777	101.119	-101.119	4.35841	4.28855
2015-02-06 18:00:00	7.46083	9.38412	7.41389	7.68141	99.9071	1.23901	109.896	-109.896	4.24761	4.18046
2015-02-06 18:30:00	10.6835	2.74645	10.6619	7.57934	99.9438	1.2399	103.815	-103.815	3.06677	2.98411
2015-02-06 19:00:00	12.0502	1.71589	12.0325	7.45068	99.9571	1.24064	103.758	-103.758	3.96446	3.89165
2015-02-06 19:30:00	7.62714	3.25505	7.60524	7.22179	99.954	1.2416	108.173	-108.173	4.38295	4.32903
2015-02-06 20:00:00	5.36019	-4.78941	5.37734	7.11122	99.9577	1.24215	104.308	-104.308	4.37014	4.30295
2015-02-06 20:30:00	7.36147	-3.59055	7.3716	7.02169	99.9656	1.24264	108.228	-108.228	4.4465	4.39433
2015-02-06 21:00:00	4.59678	-7.70183	4.62931	6.89781	99.9894	1.24347	115.44	-115.44	4.13645	4.09171
2015-02-06 21:30:00	9.92623	-11.8736	9.97817	6.8391	100.028	1.24417	120.199	-120.199	3.33856	3.2895
2015-02-06 22:00:00	0.0121344	-2.7957	0.02587	6.85018	100.071	1.24467	149.16	-149.16	2.89765	2.85126
2015-02-06 22:30:00	12.0392	-43.4795	12.2251	7.42563	100.101	1.24254	185.561	174.439	2.37948	2.18789
2015-02-06 23:00:00	4.83106	-49.6601	5.0654	6.82584	100.135	1.24559	196.653	163.347	2.87235	2.78218
2015-02-06 23:30:00	7.74305	-47.2561	7.95475	6.70152	100.16	1.24647	213.208	146.792	4.0756	3.93479
2015-02-07	6.84377	-40.1245	7.01799	6.59138	100.184	1.24728	219.939	140.061	4.22132	4.07176
2015-02-07 00:30:00	5.22664	-27.5316	5.3579	6.30399	100.206	1.24879	212.645	147.355	4.47723	4.28507
2015-02-07 01:00:00	-0.816425	-5.59717	-0.786379	5.97228	100.235	1.25061	217.839	142.161	5.04235	4.85829
2015-02-07 01:30:00	8.36956	-18.1345	8.45494	5.62094	100.244	1.25231	221.885	138.115	4.85725	4.67302
2015-02-07 02:00:00	3.12957	-24.4008	3.23964	5.33217	100.243	1.25364	225.94	134.06	5.59706	5.39103
2015-02-07 02:30:00	8.13647	-14.6098	8.19719	5.01208	100.263	1.25534	221.053	138.947	7.17856	6.92913
2015-02-07 03:00:00	-2.26845	-7.95006	-2.22978	4.59183	100.299	1.25771	227.822	132.178	7.98328	7.78814
2015-02-07 03:30:00	12.8076	-4.51302	12.8171	4.21644	100.317	1.25963	231.144	128.856	6.07409	5.89381
2015-02-07 04:00:00	-1.95482	-14.8919	-1.91667	3.83334	100.311	1.26147	233.62	126.379	6.32274	6.08557
2015-02-07 04:30:00	4.99826	-1.42793	4.99894	3.34459	100.338	1.26415	229.8	130.2	5.40022	5.15813
2015-02-07 05:00:00	1.57491	-8.12678	1.58691	2.84241	100.393	1.26712	222.413	137.587	5.48051	5.3089
2015-02-07 05:30:00	3.65097	-4.84281	3.66011	2.4419	100.433	1.26941	225.262	134.738	4.97899	4.76243
2015-02-07 06:00:00	-3.86704	1.32343	-3.86902	2.22724	100.506	1.27123	210.38	149.62	4.36423	4.15773
2015-02-07 06:30:00	2.13822	-3.37411	2.14883	1.91179	100.567	1.27343	212.751	147.249	4.38318	4.19644
2015-02-07 07:00:00	7.80077	-0.0859965	7.79655	1.70359	100.606	1.27493	224.351	135.649	4.66025	4.48237
2015-02-07 07:30:00	5.81552	-2.9067	5.82103	1.58204	100.662	1.27622	219.631	140.369	3.34359	3.1952
2015-02-07 08:00:00	3.8844	-1.07432	3.88536	1.38387	100.728	1.27801	215.607	144.393	3.35865	3.15923
2015-02-07 08:30:00	5.68359	14.2027	5.64356	1.11771	100.78	1.27991	218.128	141.872	4.09066	3.95007
2015-02-07 09:00:00	3.94462	20.8546	3.88754	1.08175	100.834	1.28076	222.206	137.794	3.43985	3.28652
2015-02-07 09:30:00	7.9196	18.4068	7.86317	0.905953	100.871	1.28204	221.949	138.051	4.05428	3.88728
2015-02-07 10:00:00	8.76243	38.5471	8.64615	0.902431	100.913	1.28259	226.969	133.031	3.89054	3.64145
2015-02-07 10:30:00	15.8565	35.4347	15.748	0.820341	100.953	1.28348	222.853	137.147	5.11899	4.95176
2015-02-07 11:00:00	6.34814	30.0886	6.27015	0.834533	100.982	1.28381	217.941	142.059	4.69302	4.49957
2015-02-07 11:30:00	15.1513	36.5021	15.0744	0.772966	100.981	1.28414	213.368	146.632	5.04177	4.8303
2015-02-07 12:00:00	7.40078	27.5969	7.35382	0.693427	101	1.28478	210.465	149.535	4.44006	4.2167
2015-02-07 12:30:00	5.05084	29.1785	5.01431	0.692386	101.007	1.28491	207.276	152.724	3.72562	3.52786
2015-02-07 13:00:00	12.8031	35.2125	12.7832	0.85763	100.986	1.28392	226.053	133.947	3.96528	3.71696
2015-02-07 13:30:00	11.845	40.8167	11.8462	1.05058	100.944	1.28254	225.412	134.588	3.355	3.10592
2015-02-07 14:00:00	22.4326	32.8697	22.3934	0.847044	100.91	1.28296	262.677	97.3231	4.47576	3.84764
2015-02-07 14:30:00	29.9255	74.994	29.7039	0.3742	100.912	1.28506	296.407	63.5927	3.91161	3.79138
2015-02-07 15:00:00	46.3961	102.802	46.1394	0.589412	100.912	1.28409	293.67	66.3303	3.60523	3.44027
2015-02-07 15:30:00	12.5974	110.965	12.4017	1.1157	100.915	1.28172	289.16	70.8402	4.03738	3.86928
2015-02-07 16:00:00	24.6587	23.6705	24.6873	2.17082	100.92	1.27711	236.492	123.509	6.03828	5.72281
2015-02-07 16:30:00	-0.852152	46.9881	-0.790905	1.99987	100.95	1.2783	231.671	128.329	5.98535	5.76612
2015-02-07 17:00:00	10.4879	48.2802	10.5684	1.55322	100.989	1.28091	232.05	127.95	6.59817	6.36806
2015-02-07 17:30:00	0.857854	16.6934	0.896644	1.13522	101.032	1.28346	239.855	120.145	6.78233	6.54916
2015-02-07 18:00:00	2.05741	7.45625	2.07642	0.486566	101.096	1.28733	240.385	119.615	7.09748	6.91708
2015-02-07 18:30:00	1.15315	33.5877	1.23272	-0.266361	101.18	1.29195	242.343	117.657	7.51388	7.30588
2015-02-07 19:00:00	1.35622	17.5726	1.39334	-0.905192	101.254	1.2959	242.383	117.617	7.33643	7.1276
2015-02-07 19:30:00	2.25855	15.5249	2.28895	-1.48056	101.3	1.29923	246.864	113.136	7.44257	7.29528
2015-02-07 20:00:00	2.05104	13.6099	2.07836	-1.97293	101.36	1.30236	249.619	110.381	6.87268	6.73543
2015-02-07 20:30:00	-0.845953	7.96964	-0.832254	-2.42421	101.388	1.30487	249.301	110.699	7.41628	7.30282
2015-02-07 21:00:00	-0.521442	13.3812	-0.504668	-2.91253	101.435	1.30779	247.732	112.268	7.98778	7.84643
2015-02-07 21:30:00	0.72947	4.63849	0.734242	-3.32854	101.482	1.31039	246.49	113.51	7.55363	7.41678
2015-02-07 22:00:00	4.92906	4.30302	4.93238	-3.75516	101.514	1.31285	245.828	114.172	7.30588	7.13239
2015-02-07 22:30:00	1.43612	4.23306	1.43871	-4.01429	101.532	1.31434	242.845	117.155	7.22789	7.06089
2015-02-07 23:00:00	1.08224	5.41826	1.08583	-4.17873	101.552	1.3154	237.528	122.472	6.26766	6.07613
2015-02-07 23:30:00	0.504671	10.3528	0.510141	-4.35738	101.571	1.31652	238.326	121.674	5.50174	5.31906
2015-02-08	2.86154	3.20024	2.86313	-4.59435	101.595	1.31797	232.873	127.126	4.39756	4.23426
2015-02-08 00:30:00	3.59061	-0.13271	3.59077	-4.69164	101.614	1.31869	227.788	132.212	3.95317	3.79917
2015-02-08 01:00:00	3.60924	9.09719	3.61203	-4.92377	101.633	1.32008	246.014	113.986	3.48218	3.37223
2015-02-08 01:30:00	0.88624	8.13945	0.89055	-5.29948	101.657	1.32226	253.371	106.629	4.68112	4.59789
2015-02-08 02:00:00	2.78374	-2.56033	2.78253	-5.38793	101.671	1.32289	257.821	102.179	6.13354	6.09969
2015-02-08 02:30:00	3.14315	-3.18179	3.14227	-5.42324	101.698	1.32338	250.978	109.022	4.09904	4.0247
2015-02-08 03:00:00	1.75642	-2.9376	1.75536	-5.48652	101.705	1.3238	243.623	116.377	3.47662	3.39649
2015-02-08 03:30:00	1.17144	1.40259	1.17206	-5.7112	101.712	1.325	256.774	103.226	3.27415	3.20778
2015-02-08 04:00:00	-3.2422	-2.65656	-3.24234	-5.87914	101.708	1.32576	248.716	111.284	3.20664	3.12139
2015-02-08 04:30:00	1.62804	-7.30577	1.62822	-5.9849	101.699	1.32615	245.464	114.536	3.19555	3.08911
2015-02-08 05:00:00	1.63167	-9.52232	1.63042	-6.13266	101.693	1.32682	239.02	120.98	3.86896	3.76799
2015-02-08 05:30:00	0.0989242	2.99133	0.0989728	-6.2288	101.677	1.32708	231.486	128.514	3.11036	2.97318
2015-02-08 06:00:00	3.96637	-0.498622	3.96636	-6.2851	101.669	1.32725	223.968	136.032	3.66371	3.5137
2015-02-08 06:30:00	3.86021	1.766	3.86072	-6.27571	101.675	1.3273	226.556	133.444	3.58104	3.42083
2015-02-08 07:00:00	3.1796	4.66023	3.18081	-6.40024	101.696	1.32821	224.997	135.003	2.4893	2.3521
2015-02-08 07:30:00	4.15979	1.04972	4.16027	-6.48819	101.709	1.32881	220.875	139.125	3.15281	3.02898
2015-02-08 08:00:00	5.92669	-0.250758	5.92689	-6.62127	101.722	1.32965	220.87	139.13	4.21314	4.09577
2015-02-08 08:30:00	0.713184	20.1535	0.71627	-6.57871	101.722	1.32942	224.154	135.846	3.90247	3.73303
2015-02-08 09:00:00	5.10607	33.2177	5.1125	-6.47453	101.723	1.32893	225.708	134.292	4.23897	4.05194
2015-02-08 09:30:00	4.53864	22.9523	4.54858	-6.1575	101.728	1.32743	224.121	135.879	3.27048	3.09477
2015-02-08 10:00:00	-3.16715	76.5024	-3.1094	-5.75019	101.723	1.32537	222.747	137.253	2.70882	2.54907
2015-02-08 10:30:00	5.57876	94.4733	5.66077	-5.21108	101.702	1.32245	234.804	125.196	2.58573	2.38057
2015-02-08 11:00:00	5.76076	34.1757	5.80355	-5.02488	101.673	1.32118	239.189	120.811	3.51342	3.38334
2015-02-08 11:30:00	10.0573	44.957	10.103	-4.38491	101.647	1.31767	252.909	107.091	3.35188	3.18012
2015-02-08 12:00:00	5.99301	108.221	6.13612	-3.88568	101.596	1.3146	256.95	103.05	2.96211	2.83302
2015-02-08 12:30:00	5.43318	103.387	5.60914	-3.22369	101.525	1.3105	247.232	112.768	1.54855	1.02944
2015-02-08 13:00:00	0.531815	115.897	0.683517	-2.59764	101.443	1.30638	110.255	-110.255	1.3381	0.944679
2015-02-08 13:30:00	-23.5264	181.23	-23.313	-2.53881	101.37	1.30514	111.53	-111.53	1.52403	1.27361
2015-02-08 14:00:00	13.3964	234.565	13.7834	-1.72389	101.296	1.30031	112.155	-112.155	1.39593	0.961732
2015-02-08 14:30:00	0.456932	167.416	0.749732	-1.34458	101.238	1.29777	132.322	-132.322	1.8062	1.65101
2015-02-08 15:00:00	-8.57633	93.0964	-8.41488	-1.01426	101.185	1.29551	117.86	-117.86	1.56533	1.17723
2015-02-08 15:30:00	11.3434	149.098	11.5813	-0.373056	101.152	1.29203	60.6977	-60.6977	1.71378	1.30282
2015-02-08 16:00:00	9.45312	115.903	9.66001	-0.273012	101.131	1.2913	95.7539	-95.7539	2.72715	2.56582
2015-02-08 16:30:00	15.5429	113.377	15.7325	-0.207	101.122	1.29086	90.5991	-90.5991	3.57664	3.3812
2015-02-08 17:00:00	15.5095	77.9015	15.6303	-0.135716	101.115	1.29043	100.319	-100.319	3.67841	3.49149
2015-02-08 17:30:00	17.1146	69.3652	17.2202	-0.122313	101.118	1.29039	100.11	-100.11	3.45079	3.24686
2015-02-08 18:00:00	8.31121	35.4409	8.35311	-0.39193	101.128	1.29177	89.9671	-89.9671	4.32301	4.13547
2015-02-08 18:30:00	15.3773	19.935	15.4001	-0.509693	101.149	1.29259	93.8986	-93.8986	3.57313	3.42449
2015-02-08 19:00:00	5.28612	37.526	5.31536	-0.751025	101.16	1.29385	102.148	-102.148	4.74933	4.6248
2015-02-08 19:30:00	8.54505	24.6263	8.54818	-0.783389	101.175	1.29413	98.7233	-98.7234	4.42667	4.28594
2015-02-08 20:00:00	7.18023	9.26454	7.17873	-0.973648	101.167	1.29492	92.5439	-92.5439	5.24573	5.15392
2015-02-08 20:30:00	2.9275	-0.483059	2.92748	-1.26909	101.153	1.29612	90.3787	-90.3787	5.70084	5.63641
2015-02-08 21:00:00	4.30656	-1.67635	4.30715	-1.47832	101.16	1.29718	89.07	-89.07	4.68734	4.61017
2015-02-08 21:30:00	9.26432	5.9755	9.25829	-1.48981	101.157	1.29719	96.9995	-96.9995	4.03604	3.93641
2015-02-08 22:00:00	3.69987	6.73034	3.69192	-1.46218	101.154	1.297	95.7959	-95.7959	3.23273	3.09972
2015-02-08 22:30:00	11.3419	6.97443	11.332	-1.5677	101.15	1.29745	103.88	-103.88	4.43131	4.27826
2015-02-08 23:00:00	8.30385	10.7219	8.28717	-1.85303	101.153	1.29882	110.075	-110.075	4.4079	4.30131
2015-02-08 23:30:00	1.31072	-1.42308	1.31258	-2.05563	101.157	1.29983	116.689	-116.689	4.16802	4.09367
2015-02-09	11.0292	20.5879	10.9852	-2.14771	101.167	1.30037	118.169	-118.169	3.12183	3.05644
2015-02-09 00:30:00	2.15324	-2.3266	2.15689	-2.4192	101.157	1.30155	128.709	-128.709	3.59086	3.5377
2015-02-09 01:00:00	2.07232	6.38211	2.05774	-2.73365	101.144	1.30287	142.725	-142.725	2.99617	2.94979
2015-02-09 01:30:00	3.18906	1.94395	3.18386	-2.93062	101.112	1.30341	140.106	-140.106	3.01148	2.96897
2015-02-09 02:00:00	-1.33641	-7.05071	-1.32053	-3.00246	101.126	1.30394	144.037	-144.037	1.58232	1.52544
2015-02-09 02:30:00	-1.19561	-5.08017	-1.18864	-3.43802	101.107	1.30586	169.336	-169.336	1.12234	1.09903
2015-02-09 03:00:00	0.20284	-9.61291	0.218354	-4.07836	101.107	1.30895	193.427	166.573	0.728712	0.679555
2015-02-09 03:30:00	-6.62712	-10.1024	-6.61359	-4.68843	101.102	1.31189	227.161	132.839	0.941223	0.851906
2015-02-09 04:00:00	-1.0878	-4.56954	-1.08573	-4.91535	101.075	1.31273	233.725	126.275	1.42472	1.34766
2015-02-09 04:30:00	2.52049	-9.80901	2.52795	-5.02551	101.061	1.31306	217.497	142.503	0.810615	0.737266
2015-02-09 05:00:00	-0.156469	-5.17155	-0.151869	-5.31034	101.064	1.31448	232.225	127.775	1.86743	1.77584
2015-02-09 05:30:00	-0.674405	-3.76107	-0.669243	-5.55211	101.052	1.31547	250.472	109.528	2.11425	2.08059
2015-02-09 06:00:00	-0.970137	-0.287419	-0.969454	-5.56897	101.042	1.31541	237.436	122.564	1.30931	1.23643
2015-02-09 06:30:00	0.930342	-2.11954	0.933207	-5.8558	101.038	1.31677	254.901	105.099	2.17464	2.05449
2015-02-09 07:00:00	1.65164	-1.86588	1.65397	-5.92575	101.04	1.31715	272.14	87.8599	1.9864	1.95064
2015-02-09 07:30:00	1.09214	-1.87305	1.09406	-5.88696	101.04	1.31698	272.119	87.8809	4.16329	4.14907
2015-02-09 08:00:00	9.83339	-5.32558	9.83715	-5.82077	101.043	1.3167	278.166	81.8335	2.06462	1.99914
2015-02-09 08:30:00	7.9462	-12.9412	7.95532	-5.70966	101.039	1.31612	274.891	85.1094	2.52472	2.46341
2015-02-09 09:00:00	-0.0200116	-0.225454	-0.0198469	-5.4573	101.019	1.31463	267.338	92.6617	1.26118	1.22566
2015-02-09 09:30:00	-0.589601	6.10386	-0.594001	-5.0571	100.978	1.31213	278.372	81.6285	1.20074	1.13515
2015-02-09 10:00:00	-2.48868	66.933	-2.55118	-4.90322	100.938	1.31084	291.414	68.5864	1.92276	1.82977
2015-02-09 10:30:00	-1.20496	91.3598	-1.2461	-4.28107	100.923	1.30767	288.576	71.4236	2.07546	1.98508
2015-02-09 11:00:00	-2.19553	-22.2709	-2.19098	-3.36944	100.886	1.30279	279.558	80.4421	1.1045	0.923861
2015-02-09 11:30:00	-0.270149	46.0224	-0.270315	-2.33509	100.839	1.29722	273.821	86.1786	0.676814	0.528657
2015-02-09 12:00:00	-2.66571	125.719	-2.6563	-1.44524	100.77	1.2921	282.352	77.6484	0.65946	0.544448
2015-02-09 12:30:00	2.57322	44.8943	2.57983	-0.197628	100.71	1.28543	81.4209	-81.4209	0.657796	0.10712
2015-02-09 13:00:00	4.26652	272.999	4.32097	0.634692	100.631	1.28053	124.136	-124.136	1.16118	1.03317
2015-02-09 13:30:00	5.29228	30.2837	5.29249	1.78194	100.546	1.27408	78.6984	-78.6984	1.31994	1.11099
2015-02-09 14:00:00	6.16288	33.4912	6.15944	2.48848	100.478	1.26995	87.8121	-87.8121	1.63704	1.43678
2015-02-09 14:30:00	9.29454	206.675	9.23756	3.4208	100.428	1.26502	87.5443	-87.5443	1.89815	1.65119
2015-02-09 15:00:00	-2.78212	15.8483	-2.78954	4.20396	100.367	1.26066	84.6488	-84.6488	2.55815	2.46629
2015-02-09 15:30:00	2.79104	55.8454	2.75203	4.76335	100.341	1.25779	84.6912	-84.6912	2.79705	2.63639
2015-02-09 16:00:00	12.4971	61.8468	12.4505	5.06924	100.321	1.25615	90.7493	-90.7493	3.43404	3.30946
2015-02-09 16:30:00	11.7882	62.7462	11.7105	5.12226	100.299	1.25559	88.1461	-88.1461	3.83735	3.72966
2015-02-09 17:00:00	18.6593	32.949	18.6036	5.15999	100.271	1.25504	89.2141	-89.2141	3.56176	3.4679
2015-02-09 17:30:00	10.5915	15.0964	10.569	5.00667	100.25	1.25549	92.0649	-92.0649	4.8437	4.75614
2015-02-09 18:00:00	12.3678	1.05536	12.3631	4.83532	100.223	1.25591	97.6379	-97.6379	5.98347	5.92612
2015-02-09 18:30:00	8.71212	-7.4422	8.72058	4.75582	100.209	1.2561	102.081	-102.081	6.04602	5.91572
2015-02-09 19:00:00	10.0331	-6.1471	10.0394	4.58334	100.199	1.25675	104.186	-104.186	6.00988	5.89686
2015-02-09 19:30:00	8.51692	-5.91926	8.52489	4.32318	100.188	1.25775	104.361	-104.361	5.52829	5.38724
2015-02-09 20:00:00	6.10746	-5.08587	6.11663	4.08777	100.175	1.25862	107.21	-107.21	5.84445	5.72142
2015-02-09 20:30:00	2.90905	-8.00211	2.92781	3.83855	100.179	1.25979	109.691	-109.691	3.78813	3.67407
2015-02-09 21:00:00	6.10434	-11.4695	6.13021	3.81101	100.164	1.25972	121.573	-121.573	3.42871	3.37791
2015-02-09 21:30:00	1.73338	-11.0776	1.75953	3.80874	100.14	1.25944	127.155	-127.155	3.55921	3.52701
2015-02-09 22:00:00	1.66906	-11.7399	1.69603	3.6622	100.117	1.25982	125.842	-125.842	3.88424	3.85241
2015-02-09 22:30:00	11.9308	-18.7518	11.9645	3.53851	100.088	1.26005	130.933	-130.933	4.40522	4.34326
2015-02-09 23:00:00	3.30471	-8.20227	3.32145	3.23848	100.068	1.26116	167.692	-167.692	1.25407	1.14072
2015-02-09 23:30:00	-2.18817	-12.0471	-2.16183	2.54312	100.046	1.26406	218.545	141.455	0.965807	0.87063
2015-02-10	1.37618	-7.80053	1.39437	2.16991	100.03	1.26554	227.332	132.668	1.0717	0.983969
2015-02-10 00:30:00	5.98037	-21.5161	6.04441	1.37304	100.029	1.26914	252.137	107.863	2.49592	2.47336
2015-02-10 01:00:00	-0.4839	-5.23128	-0.469335	0.746624	100.017	1.27194	263.406	96.5937	3.33532	3.29912
2015-02-10 01:30:00	4.93674	-15.2667	4.96834	0.468026	99.9926	1.27296	268.126	91.8738	4.53768	4.50531
2015-02-10 02:00:00	3.74598	-15.5452	3.77683	0.250009	99.9674	1.27367	269.432	90.5681	3.8158	3.77663
2015-02-10 02:30:00	1.2457	-9.7082	1.26355	0.160227	99.933	1.27366	273.889	86.1108	4.46194	4.44312
2015-02-10 03:00:00	3.41721	-9.32062	3.43504	-0.0442529	99.9158	1.27438	270.981	89.019	2.12805	2.0911
2015-02-10 03:30:00	1.72131	-8.45408	1.73627	0.246204	99.8757	1.27254	276.818	83.1823	2.3066	2.2451
2015-02-10 04:00:00	-2.6895	25.8139	-2.7388	0.657833	99.838	1.27014	264.615	95.3849	2.38417	2.34057
2015-02-10 04:30:00	-2.6172	17.3214	-2.64218	1.64338	99.7981	1.26511	269.291	90.7095	4.50015	4.48432
2015-02-10 05:00:00	-1.00698	-0.60899	-1.00582	1.62531	99.7819	1.265	268.815	91.185	2.78219	2.74822
2015-02-10 05:30:00	0.0772844	10.5635	0.0590207	1.12598	99.7492	1.26686	284.442	75.5578	2.66436	2.60275
2015-02-10 06:00:00	-2.55393	66.4136	-2.66067	1.84813	99.7163	1.26314	280.733	79.2672	3.63432	3.55185
2015-02-10 06:30:00	-2.77303	-7.82719	-2.75818	2.55816	99.7093	1.2598	262.14	97.8599	3.19744	3.17911
2015-02-10 07:00:00	-0.0562026	-1.54852	-0.0537361	4.22024	99.6919	1.25202	252.106	107.894	3.00074	2.98025
2015-02-10 07:30:00	-0.275113	4.29777	-0.282313	3.47064	99.6948	1.25544	256.243	103.757	1.35284	1.31072
2015-02-10 08:00:00	0.32306	10.5884	0.304524	3.10134	99.7096	1.2573	261.305	98.6945	1.27744	1.21764
2015-02-10 08:30:00	3.81141	-37.0746	3.88155	3.40253	99.7282	1.25618	245.208	114.792	2.00062	1.8227
2015-02-10 09:00:00	2.45482	-8.02735	2.4693	3.30416	99.7148	1.25645	244.365	115.635	1.51555	1.36248
2015-02-10 09:30:00	0.498204	27.2793	0.449388	3.391	99.7083	1.25597	252.124	107.876	1.75219	1.71527
2015-02-10 10:00:00	-1.02542	21.5779	-1.04975	5.19238	99.6815	1.24756	252.844	107.156	2.56482	2.53247
2015-02-10 10:30:00	-4.53212	8.50993	-4.54154	5.10944	99.6592	1.24764	276.733	83.2667	1.24697	1.09881
2015-02-10 11:00:00	17.993	16.7738	17.9554	5.51762	99.6336	1.24544	282.015	77.9848	1.10411	0.791865
2015-02-10 11:30:00	14.527	168.88	14.2079	6.71312	99.5881	1.23955	66.1407	-66.1407	0.671064	0.308301
2015-02-10 12:00:00	10.7164	32.7933	10.6314	7.68792	99.5494	1.23471	76.4	-76.4	1.01586	0.725512
2015-02-10 12:30:00	-2.81137	37.0856	-2.92585	8.31348	99.495	1.23124	77.2371	-77.2371	1.44002	1.28235
2015-02-10 13:00:00	21.4571	39.6225	21.3137	8.77599	99.4357	1.22847	83.3072	-83.3072	2.12243	2.0587
2015-02-10 13:30:00	10.189	81.8564	10.0088	9.47317	99.3781	1.22483	67.6326	-67.6326	2.09821	1.90633
2015-02-10 14:00:00	2.28826	68.4097	2.16318	10.1206	99.3157	1.22129	84.2324	-84.2324	2.42157	2.27266
2015-02-10 14:30:00	11.9166	65.3591	11.8261	10.6372	99.2536	1.21835	78.143	-78.143	2.89299	2.75157
2015-02-10 15:00:00	-4.73404	71.8797	-4.84115	10.644	99.2198	1.21788	98.7939	-98.7939	3.31527	3.21703
2015-02-10 15:30:00	-1.70154	67.4571	-1.80873	10.9123	99.2081	1.21658	87.3328	-87.3328	2.84042	2.74011
2015-02-10 16:00:00	2.61211	40.6168	2.54964	11.2077	99.1769	1.21494	89.0134	-89.0134	2.54259	2.44082
2015-02-10 16:30:00	11.7042	39.8755	11.6505	11.5072	99.1618	1.2135	73.2695	-73.2695	2.59186	2.49928
2015-02-10 17:00:00	20.5248	17.7125	20.4909	11.7493	99.149	1.21229	93.5619	-93.5619	2.93812	2.83845
2015-02-10 17:30:00	9.98596	9.53067	9.96534	11.7228	99.1542	1.21244	93.7935	-93.7935	3.71176	3.6141
2015-02-10 18:00:00	1.00013	2.17974	0.995113	11.3579	99.1786	1.21427	101.281	-101.281	4.74471	4.66184
2015-02-10 18:30:00	10.9971	-15.023	11.0345	11.0304	99.1961	1.21582	95.4715	-95.4714	4.90793	4.83606
2015-02-10 19:00:00	6.72997	-9.64138	6.76013	10.6963	99.2295	1.2176	91.8682	-91.8682	4.50346	4.44832
2015-02-10 19:30:00	8.82739	-16.2255	8.88361	10.4808	99.2477	1.21872	102.819	-102.819	4.90656	4.82025
2015-02-10 20:00:00	22.402	-1.17098	22.391	10.1306	99.2604	1.22041	110.517	-110.517	5.65894	5.56029
2015-02-10 20:30:00	11.7167	-16.5766	11.7703	9.74855	99.3016	1.22256	112.35	-112.35	2.98534	2.78304
2015-02-10 21:00:00	-0.576367	-2.79825	-0.56664	9.54374	99.3419	1.22397	140.755	-140.755	2.13085	1.76736
2015-02-10 21:30:00	8.14551	-8.1699	8.17216	9.22411	99.3566	1.22548	64.2555	-64.2555	1.1195	0.93023
2015-02-10 22:00:00	-2.61192	2.20286	-2.61923	8.82329	99.3887	1.2276	247.364	112.636	0.657696	0.587615
2015-02-10 22:30:00	-4.9059	-15.4616	-4.84968	8.61564	99.3958	1.22866	257.905	102.095	2.80274	2.78708
2015-02-10 23:00:00	-0.587924	17.9721	-0.634455	8.11626	99.3938	1.23089	254.262	105.738	4.4489	4.43372
2015-02-10 23:30:00	-2.62646	-8.06866	-2.60693	8.0694	99.4115	1.23134	261.11	98.8899	4.16144	4.1181
2015-02-11	4.36559	-36.251	4.44243	8.54978	99.4136	1.22928	258.972	101.028	4.82372	4.80654
2015-02-11 00:30:00	5.00936	-29.7617	5.07254	7.40323	99.4191	1.23437	261.616	98.3836	7.11264	7.0319
2015-02-11 01:00:00	1.14337	-30.3168	1.22632	6.2329	99.4404	1.23976	273.827	86.1726	7.03346	6.93055
2015-02-11 01:30:00	-0.400346	-19.5966	-0.337414	4.96321	99.4753	1.24582	288.636	71.3642	5.9026	5.78499
2015-02-11 02:00:00	-4.64514	-41.9382	-4.48553	4.70452	99.4901	1.24712	290.934	69.0664	5.03242	4.93757
2015-02-11 02:30:00	-1.29879	-8.4918	-1.2626	4.51822	99.5045	1.2481	296.491	63.5089	4.95277	4.84974
2015-02-11 03:00:00	-11.7193	4.59507	-11.7323	3.84395	99.4852	1.2508	294.79	65.2104	5.07677	4.97605
2015-02-11 03:30:00	13.8534	-26.1651	14.0082	3.37085	99.4803	1.25276	299.761	60.2388	6.01638	5.95126
2015-02-11 04:00:00	18.0639	-28.2993	18.2232	3.3875	99.4846	1.25276	299.303	60.6973	5.36605	5.31238
2015-02-11 04:30:00	6.25329	-7.24365	6.29427	2.98087	99.4855	1.25459	289.551	70.4486	3.89558	3.83618
2015-02-11 05:00:00	12.9544	-11.6969	13.0131	2.71175	99.4806	1.25579	286.852	73.1483	4.4563	4.40116
2015-02-11 05:30:00	16.0784	-25.9647	16.1997	2.5386	99.4914	1.2568	286.877	73.1227	5.42473	5.34966
2015-02-11 06:00:00	12.7291	-37.6419	12.8966	2.47935	99.4996	1.25722	279.084	80.9156	5.5828	5.49272
2015-02-11 06:30:00	10.0684	-24.5703	10.1743	2.16981	99.5299	1.25903	277.908	82.0919	5.23648	5.1598
2015-02-11 07:00:00	5.80921	-24.9178	5.91702	1.93326	99.5558	1.26045	280.782	79.2177	5.89761	5.84241
2015-02-11 07:30:00	6.70937	-37.2471	6.86551	1.87971	99.5962	1.26122	282.389	77.6114	6.59191	6.53576
2015-02-11 08:00:00	5.0312	-21.536	5.12086	1.72329	99.65	1.26262	282.206	77.7944	5.47111	5.4143
2015-02-11 08:30:00	9.40738	-12.0387	9.45262	1.43731	99.6945	1.2645	281.169	78.8312	5.3428	5.25737
2015-02-11 09:00:00	9.71666	-8.69071	9.74725	1.3873	99.7251	1.26511	278.861	81.1385	4.08551	3.99128
2015-02-11 09:30:00	19.8297	5.13018	19.7934	1.72034	99.7514	1.26394	279.375	80.6247	3.60996	3.48696
2015-02-11 10:00:00	11.9106	21.6876	11.806	2.00857	99.7592	1.26269	275.265	84.7353	4.22251	4.1459
2015-02-11 10:30:00	14.4335	16.0462	14.3571	2.59292	99.7387	1.25978	274.331	85.6686	3.89889	3.84455
2015-02-11 11:00:00	10.2361	84.1417	9.89172	3.43062	99.7138	1.25566	267.471	92.5293	2.98507	2.86958
2015-02-11 11:30:00	-0.537689	116.465	-0.927508	4.1886	99.6784	1.25184	259.984	100.016	3.35405	3.2547
2015-02-11 12:00:00	11.3454	99.2458	11.0198	4.89163	99.6452	1.24827	259.049	100.951	3.55516	3.44323
2015-02-11 12:30:00	6.1503	89.4896	5.88126	5.62009	99.5898	1.24433	253.255	106.745	3.26475	3.10996
2015-02-11 13:00:00	14.6289	100.082	14.3661	6.21028	99.5242	1.24092	254.599	105.401	3.01267	2.80373
2015-02-11 13:30:00	1.81122	31.9346	1.73911	6.77061	99.4687	1.23777	251.861	108.139	2.22362	2.04775
[truncated: 13,098 more rows]
