# Supplementary material for: Intercomparison between the Integrated Urban land Model and theNoah Urban Canopy Model
Source: Copernicus journal article supplement (doi:10.5194/gmd-2019-298), 2020-02-24
Supplement: Supplementary file 2 [file daqisuo_rmet.xls]

## Sheet: daqisuo_rmet
TOA5	1606	CR5000	1606	2.1	CPU:OPEC_325tower-47m-0901.CR5	59160	RMET_30m
TIMESTAMP	RECORD	DR_Avg	UR_Avg	DLR_Avg	ULR_Avg	Rn_Avg	T_CNR1_C_Avg
TS	RN	W/m^2	W/m^2	W/m^2	W/m^2	W/m^2
		Avg	Avg	Avg	Avg	Avg	Avg
2015-01-01	47690	0	2.554	201.3	296.4	-97.7	-3.07
2015-01-01 00:30:00	47691	0	2.62	201.9	296.3	-97	-2.982
2015-01-01 01:00:00	47692	0	2.57	201.1	293.4	-94.9	-3.525
2015-01-01 01:30:00	47693	0.005	3.317	200.8	293	-95.5	-3.797
2015-01-01 02:00:00	47694	0	2.979	200.8	295.1	-97.3	-3.288
2015-01-01 02:30:00	47695	0	2.863	200.6	296	-98.3	-3.056
2015-01-01 03:00:00	47696	0	2.719	199.9	295.3	-98.1	-3.035
2015-01-01 03:30:00	47697	0	2.671	198.9	293.7	-97.4	-3.422
2015-01-01 04:00:00	47698	0	3.03	197.4	289.3	-95	-4.356
2015-01-01 04:30:00	47699	0	3.158	195.5	289.3	-97	-4.683
2015-01-01 05:00:00	47700	0	2.966	194.4	289.2	-97.8	-4.687
2015-01-01 05:30:00	47701	0	3.084	194.9	287.1	-95.3	-4.988
2015-01-01 06:00:00	47702	0	3.283	195	286.3	-94.6	-5.237
2015-01-01 06:30:00	47703	0	3.548	194.9	284.7	-93.3	-5.506
2015-01-01 07:00:00	47704	0	3.437	195.1	282.6	-90.9	-5.836
2015-01-01 07:30:00	47705	0.002	2.728	195.3	281.9	-89.4	-5.744
2015-01-01 08:00:00	47706	6.627	3.769	195.9	282.3	-83.5	-5.557
2015-01-01 08:30:00	47707	47.77	10.11	196.3	284.2	-50.27	-4.746
2015-01-01 09:00:00	47708	127.7	17	197.9	288.9	19.62	-2.06
2015-01-01 09:30:00	47709	210.8	22.17	200.3	295.2	93.7	-0.498
2015-01-01 10:00:00	47710	281.4	24.25	204.6	302.7	159.1	1.58
2015-01-01 10:30:00	47711	316.4	25.62	209.5	310.6	189.7	3.67
2015-01-01 11:00:00	47712	392.7	29.47	212.8	315.5	260.5	3.238
2015-01-01 11:30:00	47713	425.4	32.78	215.5	319.1	289	2.465
2015-01-01 12:00:00	47714	434.9	35.6	217.4	322.2	294.5	2.327
2015-01-01 12:30:00	47715	451.4	38.22	218.5	323.9	307.8	2.017
2015-01-01 13:00:00	47716	450.7	37.04	220.9	326.4	308.2	2.491
2015-01-01 13:30:00	47717	419.3	33.19	221.9	326	282.1	2.662
2015-01-01 14:00:00	47718	381.7	29.44	221.8	324.6	249.5	2.649
2015-01-01 14:30:00	47719	331	22.89	222.5	323.1	207.5	3.239
2015-01-01 15:00:00	47720	295.2	17.32	222	320.4	179.6	3.36
2015-01-01 15:30:00	47721	220.5	12.35	222.1	317.6	112.6	3.408
2015-01-01 16:00:00	47722	138.9	8.97	222.1	314.7	37.38	2.971
2015-01-01 16:30:00	47723	67.13	6.525	222.1	312	-29.32	2.08
2015-01-01 17:00:00	47724	15.63	3.541	221.5	308.5	-74.95	0.641
2015-01-01 17:30:00	47725	0.261	2.759	220	306.2	-88.7	-0.21
2015-01-01 18:00:00	47726	0	2.948	219.7	303.7	-87	-0.548
2015-01-01 18:30:00	47727	0	2.658	219.6	304.6	-87.6	-0.392
2015-01-01 19:00:00	47728	0	2.504	219.4	304	-87.1	-0.459
2015-01-01 19:30:00	47729	0	2.487	219.5	301.6	-84.6	-0.685
2015-01-01 20:00:00	47730	0	3.074	219.7	299.3	-82.7	-1.201
2015-01-01 20:30:00	47731	0	2.416	220.5	300.6	-82.5	-0.73
2015-01-01 21:00:00	47732	0	2.498	221	299	-80.5	-1.007
2015-01-01 21:30:00	47733	0	3.013	221.5	298.3	-79.76	-1.477
2015-01-01 22:00:00	47734	0	2.531	221.3	297.1	-78.41	-1.736
2015-01-01 22:30:00	47735	0	2.28	220.1	296.4	-78.58	-2.079
2015-01-01 23:00:00	47736	0	2.7	219.1	294.5	-78.17	-2.412
2015-01-01 23:30:00	47737	0	2.436	218.8	293.6	-77.25	-2.698
2015-01-02	47738	0	3.551	218.3	292.6	-77.84	-3.249
2015-01-02 00:30:00	47739	0	2.509	217	293.3	-78.77	-2.717
2015-01-02 01:00:00	47740	0	1.689	215.1	293	-79.59	-3.232
2015-01-02 01:30:00	47741	0	2.547	215.4	290.9	-77.99	-3.559
2015-01-02 02:00:00	47742	0	2.512	216.7	291.2	-77.03	-2.906
2015-01-02 02:30:00	47743	0.011	3.039	216.8	291	-77.24	-3.064
2015-01-02 03:00:00	47744	0.014	3.455	217	293.2	-79.7	-2.491
2015-01-02 03:30:00	47745	0.011	3.276	216.5	295.2	-82	-2.071
2015-01-02 04:00:00	47746	0	2.603	215.9	296.5	-83.1	-1.529
2015-01-02 04:30:00	47747	0	2.224	215	294.5	-81.7	-1.778
2015-01-02 05:00:00	47748	0	2.628	215.2	297.4	-84.8	-1.368
2015-01-02 05:30:00	47749	0	1.305	212.6	297.1	-85.7	-1.973
2015-01-02 06:00:00	47750	0	1.692	210.1	292.2	-83.8	-3.345
2015-01-02 06:30:00	47751	0	1.683	210.2	292.6	-84.2	-3.384
2015-01-02 07:00:00	47752	0	1.803	209.5	289.9	-82.2	-3.875
2015-01-02 07:30:00	47753	0.002	2.174	209.8	288.3	-80.7	-3.918
2015-01-02 08:00:00	47754	6.456	2.987	210.2	289.8	-76.13	-3.766
2015-01-02 08:30:00	47755	47.52	9.86	210.4	290.5	-42.45	-3.167
2015-01-02 09:00:00	47756	132.5	18.39	212	295	31.04	-0.776
2015-01-02 09:30:00	47757	216.2	24.9	213.6	301.2	103.7	0.087
2015-01-02 10:00:00	47758	295.4	30.2	216.1	307.8	173.5	1.074
2015-01-02 10:30:00	47759	331.5	34.91	218.3	313.2	201.7	1.28
2015-01-02 11:00:00	47760	411.2	36.63	221	318.6	276.9	2.077
2015-01-02 11:30:00	47761	446.3	33.89	225.6	326.3	311.7	4.237
2015-01-02 12:00:00	47762	469.1	35.64	228.6	331.4	330.6	4.94
2015-01-02 12:30:00	47763	480.8	37.19	230.5	334.7	339.4	4.883
2015-01-02 13:00:00	47764	482.4	37.28	231.7	336.6	340.2	5.058
2015-01-02 13:30:00	47765	462	33.1	233.1	336.9	325.1	5.63
2015-01-02 14:00:00	47766	420.7	25.69	235.4	337.8	292.7	7.349
2015-01-02 14:30:00	47767	369.4	20.82	235.2	333.8	249.9	6.617
2015-01-02 15:00:00	47768	303.3	14.25	235.3	330	194.4	6.647
2015-01-02 15:30:00	47769	203.8	10.26	235.6	326.2	102.8	5.799
2015-01-02 16:00:00	47770	127.7	8.71	234.3	322.4	30.88	4.563
2015-01-02 16:30:00	47771	50.2	5.383	232.6	318.4	-40.99	3.086
2015-01-02 17:00:00	47772	10.37	3.003	231.9	315	-75.72	1.642
2015-01-02 17:30:00	47773	0.169	2.322	229.8	312.8	-85.1	0.958
2015-01-02 18:00:00	47774	0	2.412	229.2	311.6	-84.8	0.652
2015-01-02 18:30:00	47775	0	2.674	227.6	309	-84.1	0.271
2015-01-02 19:00:00	47776	0	2.576	227.1	309	-84.5	0.28
2015-01-02 19:30:00	47777	0	2.676	226.7	308.1	-84	0.111
2015-01-02 20:00:00	47778	0	2.592	225.8	307.9	-84.7	0.105
2015-01-02 20:30:00	47779	0	2.634	224.8	306.7	-84.5	-0.129
2015-01-02 21:00:00	47780	0	2.876	224.2	304.6	-83.2	-0.491
2015-01-02 21:30:00	47781	0	2.809	224	303.2	-82	-0.604
2015-01-02 22:00:00	47782	0	3.204	223.7	302	-81.5	-0.875
2015-01-02 22:30:00	47783	0	3.218	224	300.6	-79.77	-1.019
2015-01-02 23:00:00	47784	0	3.222	224.5	299.2	-77.94	-1.376
2015-01-02 23:30:00	47785	0	2.741	224.4	298.3	-76.66	-1.149
2015-01-03	47786	0	1.783	223.4	297.7	-76.13	-1.152
2015-01-03 00:30:00	47787	0	1.822	222.6	296	-75.22	-1.888
2015-01-03 01:00:00	47788	0	2.551	221.9	294.3	-74.99	-2.847
2015-01-03 01:30:00	47789	0	3.214	221.8	293.2	-74.64	-3.499
2015-01-03 02:00:00	47790	0	3.324	222.7	292.4	-73.02	-3.814
2015-01-03 02:30:00	47791	0	2.852	224.4	292	-70.46	-3.411
2015-01-03 03:00:00	47792	0	2.596	224.6	291.2	-69.16	-3.873
2015-01-03 03:30:00	47793	0	3.002	224.6	290.8	-69.13	-4.232
2015-01-03 04:00:00	47794	0	2.738	224.9	291.1	-68.89	-4.49
2015-01-03 04:30:00	47795	0	2.81	227.2	289.9	-65.49	-4.974
2015-01-03 05:00:00	47796	0.01	2.814	236.2	290.7	-57.24	-4.95
2015-01-03 05:30:00	47797	0.041	1.525	255.3	294	-40.2	-4.43
2015-01-03 06:00:00	47798	0.147	0.977	281.6	297	-16.26	-4.218
2015-01-03 06:30:00	47799	0.03	0.548	285.4	298.6	-13.67	-3.956
2015-01-03 07:00:00	47800	0.039	0.586	287.2	299.4	-12.7	-3.852
2015-01-03 07:30:00	47801	0.011	0.906	269.1	298.3	-30.1	-3.813
2015-01-03 08:00:00	47802	3.682	1.989	249.7	296.4	-45.04	-4.01
2015-01-03 08:30:00	47803	17.47	4.026	232.8	295.1	-48.92	-4.081
2015-01-03 09:00:00	47804	64.86	10.27	228.3	296.7	-13.82	-3.584
2015-01-03 09:30:00	47805	115.5	15.55	227.5	299.6	27.77	-2.636
2015-01-03 10:00:00	47806	174.1	20.94	228.2	304.2	77.2	-1.27
2015-01-03 10:30:00	47807	219.5	25.75	228.8	308.4	114.2	-0.529
2015-01-03 11:00:00	47808	280.9	29.1	230.4	312.8	169.3	0.394
2015-01-03 11:30:00	47809	316.3	31.53	231.8	316.6	200	0.789
2015-01-03 12:00:00	47810	343.4	32.66	233.6	321.6	222.7	1.862
2015-01-03 12:30:00	47811	357.9	32.99	235.8	326.1	234.6	3.013
2015-01-03 13:00:00	47812	354.1	32.16	238	329.2	230.8	4.099
2015-01-03 13:30:00	47813	338.4	29.25	240.2	331.4	218	4.97
2015-01-03 14:00:00	47814	310.6	24.77	241.3	331.8	195.3	5.511
2015-01-03 14:30:00	47815	265	20.67	240.9	329.7	155.5	5.057
2015-01-03 15:00:00	47816	216.4	14.81	241.5	327.9	115.1	5.527
2015-01-03 15:30:00	47817	160.7	11.49	241.7	325.4	65.43	5.119
2015-01-03 16:00:00	47818	104.4	8.47	241.2	321.6	15.54	4.558
2015-01-03 16:30:00	47819	52.28	6.199	241.2	318.9	-31.63	3.644
2015-01-03 17:00:00	47820	12.93	3.754	241	314.6	-64.45	2.429
2015-01-03 17:30:00	47821	0.453	3.043	240.2	311.7	-74.03	1.685
2015-01-03 18:00:00	47822	0	3.05	240.3	309.9	-72.68	1.046
2015-01-03 18:30:00	47823	0	3.609	239.5	308.8	-72.94	0.583
2015-01-03 19:00:00	47824	0	3.148	238.6	308.1	-72.59	0.802
2015-01-03 19:30:00	47825	0	2.46	238.2	307.2	-71.49	0.712
2015-01-03 20:00:00	47826	0	2.679	238	306	-70.72	0.279
2015-01-03 20:30:00	47827	0.004	2.883	237.8	304.3	-69.44	-0.54
2015-01-03 21:00:00	47828	0.009	3.875	237.1	303.6	-70.31	-1.052
2015-01-03 21:30:00	47829	0.012	3.799	236.9	303	-69.87	-0.577
2015-01-03 22:00:00	47830	0	2.833	236.7	303.1	-69.22	0.01
2015-01-03 22:30:00	47831	0	2.728	236.5	303	-69.19	0.15
2015-01-03 23:00:00	47832	0	2.051	236.1	302.4	-68.31	0.301
2015-01-03 23:30:00	47833	0	2.514	234.5	301.3	-69.26	-0.977
2015-01-04	47834	0	2.632	232.7	300.4	-70.33	-1.419
2015-01-04 00:30:00	47835	0	2.312	231.4	299.6	-70.55	-1.715
2015-01-04 01:00:00	47836	0.002	2.942	231.4	298.1	-69.62	-2.201
2015-01-04 01:30:00	47837	0	2.699	231.3	297.6	-68.92	-2.118
2015-01-04 02:00:00	47838	0	2.845	231	296.2	-68.06	-2.785
2015-01-04 02:30:00	47839	0.026	3.284	230.4	296.4	-69.25	-2.63
2015-01-04 03:00:00	47840	0	2.384	229.7	295.6	-68.26	-2.429
2015-01-04 03:30:00	47841	0	2.408	229.4	294.5	-67.58	-2.747
2015-01-04 04:00:00	47842	0.004	3.106	229.6	293.8	-67.37	-3.196
2015-01-04 04:30:00	47843	0.016	3.222	229.8	293.6	-67.05	-3.067
2015-01-04 05:00:00	47844	0.168	3.481	230.1	293.4	-66.66	-3.262
2015-01-04 05:30:00	47845	0.004	2.383	232.2	296.8	-66.91	-1.812
2015-01-04 06:00:00	47846	0	2.102	230.8	295.8	-67.11	-2.133
2015-01-04 06:30:00	47847	0	2.252	231	294.7	-65.99	-2.64
2015-01-04 07:00:00	47848	0	1.787	234	295.8	-63.53	-2.887
2015-01-04 07:30:00	47849	0.311	2.276	250.1	296.6	-48.51	-2.977
2015-01-04 08:00:00	47850	10.61	3.459	254.6	299.3	-37.53	-2.126
2015-01-04 08:30:00	47851	40.52	6.983	252.8	301.9	-15.54	-1.648
2015-01-04 09:00:00	47852	86.8	12.48	253.8	307	21.13	-0.489
2015-01-04 09:30:00	47853	131.3	17.29	239.5	309.7	43.85	0.607
2015-01-04 10:00:00	47854	241	26.86	236.2	317.2	133.2	3.464
2015-01-04 10:30:00	47855	277.9	28.29	240.7	325.6	164.7	6.034
2015-01-04 11:00:00	47856	357.8	31.02	243.5	332.8	237.5	7.271
2015-01-04 11:30:00	47857	414.1	35.44	242.9	336.6	285.1	6.61
2015-01-04 12:00:00	47858	437.8	34.74	244	343.7	303.4	8.04
2015-01-04 12:30:00	47859	456.3	36.38	246.4	348.4	317.9	8.51
2015-01-04 13:00:00	47860	448.1	35.74	247.9	351.2	309	9.13
2015-01-04 13:30:00	47861	406.1	31.72	252.4	352	274.8	9.43
2015-01-04 14:00:00	47862	360.4	28.63	255.6	352.3	235	9.54
2015-01-04 14:30:00	47863	218	16.74	256.6	348.1	109.8	9.31
2015-01-04 15:00:00	47864	229.6	21.51	271.5	350.2	129.5	9.06
2015-01-04 15:30:00	47865	168.1	14.49	262	346.1	69.53	8.88
2015-01-04 16:00:00	47866	99	9.82	256.9	340.8	5.262	7.846
2015-01-04 16:30:00	47867	38.09	5.67	254.1	334.4	-47.88	6.644
2015-01-04 17:00:00	47868	13.98	3.239	261.3	331.7	-59.67	6.136
2015-01-04 17:30:00	47869	0.152	1.291	269	329.8	-61.96	5.701
2015-01-04 18:00:00	47870	0	1.751	257.5	327.2	-71.45	5.23
2015-01-04 18:30:00	47871	0	1.688	264.1	326.6	-64.15	4.948
2015-01-04 19:00:00	47872	0	1.912	262.1	325.1	-64.92	4.62
2015-01-04 19:30:00	47873	0	2.307	263	323.1	-62.38	4.291
2015-01-04 20:00:00	47874	0.013	2.159	278.8	324.4	-47.74	4.228
2015-01-04 20:30:00	47875	0.001	1.479	281.6	326	-45.93	4.491
2015-01-04 21:00:00	47876	0	1.106	284.6	326.3	-42.8	4.336
2015-01-04 21:30:00	47877	0	0.543	292.3	326.7	-35.01	4.047
2015-01-04 22:00:00	47878	0	0.411	295.8	326.3	-30.84	3.609
2015-01-04 22:30:00	47879	0.001	0.492	301.8	326.4	-25.14	3.4
2015-01-04 23:00:00	47880	0.001	0.315	304.6	326.2	-22	3.179
2015-01-04 23:30:00	47881	0.008	0.427	310	326.2	-16.62	3.061
2015-01-05	47882	0.011	0.369	312.2	326.5	-14.6	3.021
2015-01-05 00:30:00	47883	0.004	0.401	308.3	325.7	-17.75	2.859
2015-01-05 01:00:00	47884	0.002	0.577	303.9	324.3	-21	2.652
2015-01-05 01:30:00	47885	0.017	1.017	303.3	323.7	-21.35	2.517
2015-01-05 02:00:00	47886	0.004	1.129	290.2	322.5	-33.4	2.471
2015-01-05 02:30:00	47887	0	1.451	280.6	319.4	-40.19	2.118
2015-01-05 03:00:00	47888	0.108	1.268	301.3	321.7	-21.55	2.137
2015-01-05 03:30:00	47889	0.03	0.916	305.8	322.8	-17.94	2.287
2015-01-05 04:00:00	47890	0.053	0.946	306.2	322.8	-17.52	2.318
2015-01-05 04:30:00	47891	0.022	0.838	306.5	324	-18.3	2.469
2015-01-05 05:00:00	47892	0.006	0.679	306.1	323.7	-18.23	2.392
2015-01-05 05:30:00	47893	0.005	0.752	305.4	322.8	-18.21	2.188
2015-01-05 06:00:00	47894	0.021	1.113	297.9	321.5	-24.74	2.036
2015-01-05 06:30:00	47895	0.055	1.187	301.8	322.1	-21.46	2.192
2015-01-05 07:00:00	47896	0.092	1.092	305.9	323.2	-18.34	2.419
2015-01-05 07:30:00	47897	0.059	1.093	304.6	324	-20.41	2.518
2015-01-05 08:00:00	47898	3.337	1.428	301.3	324.3	-21.1	2.632
2015-01-05 08:30:00	47899	21.1	3.657	285.6	324.1	-21.07	2.75
2015-01-05 09:00:00	47900	62.86	8.76	283.8	326.7	11.24	3.041
2015-01-05 09:30:00	47901	93	11.69	287.7	330.8	38.12	3.864
2015-01-05 10:00:00	47902	159.1	18.95	281.8	335.2	86.7	4.84
2015-01-05 10:30:00	47903	281.6	31.93	287.6	345.6	191.7	7.23
2015-01-05 11:00:00	47904	313.1	32.42	287	353.4	214.2	9.09
2015-01-05 11:30:00	47905	322.4	31.6	280.6	360.6	210.7	10.78
2015-01-05 12:00:00	47906	355.5	35.04	277	362.1	235.3	10.84
2015-01-05 12:30:00	47907	321.2	32.64	286.9	364.4	211	10.99
2015-01-05 13:00:00	47908	391.8	39.93	282	364.3	269.6	10.25
2015-01-05 13:30:00	47909	288.6	29.96	284	361.5	181.1	9.78
2015-01-05 14:00:00	47910	218.3	23.19	275.6	355.9	114.8	8.97
2015-01-05 14:30:00	47911	365.3	32.2	272.5	358.6	247	9.79
2015-01-05 15:00:00	47912	289.2	23.65	264.4	353.9	176	9.47
2015-01-05 15:30:00	47913	211.5	16.07	250.6	346.7	99.3	8.42
2015-01-05 16:00:00	47914	147.5	12.4	246.3	341.8	39.61	7.499
2015-01-05 16:30:00	47915	80.4	8.79	249.7	339	-17.59	6.44
2015-01-05 17:00:00	47916	18.31	3.314	255.5	334.5	-64.03	4.921
2015-01-05 17:30:00	47917	0.392	1.47	254.1	330.8	-77.84	4.08
2015-01-05 18:00:00	47918	0	1.541	243.6	327.6	-85.5	3.487
2015-01-05 18:30:00	47919	0	1.699	235.6	324.6	-90.8	2.95
2015-01-05 19:00:00	47920	0	1.883	221.7	321.2	-101.3	2.188
2015-01-05 19:30:00	47921	0	2.011	213.8	317.5	-105.7	1.41
2015-01-05 20:00:00	47922	0	2.236	208.1	314.3	-108.5	0.632
2015-01-05 20:30:00	47923	0	2.258	206.8	312.3	-107.8	0.219
2015-01-05 21:00:00	47924	0	2.136	205.1	310.9	-107.9	-0.038
2015-01-05 21:30:00	47925	0	2.283	203.6	309.2	-107.9	-0.468
2015-01-05 22:00:00	47926	0	2.48	202.1	307.2	-107.5	-0.875
2015-01-05 22:30:00	47927	0	2.753	202.3	305.4	-105.8	-1.286
2015-01-05 23:00:00	47928	0	2.625	203.5	305.1	-104.2	-1.418
2015-01-05 23:30:00	47929	0	2.627	203.3	304.3	-103.7	-1.657
2015-01-06	47930	0	2.565	202.1	302.8	-103.2	-1.943
2015-01-06 00:30:00	47931	0	2.638	201.3	301.2	-102.5	-2.252
2015-01-06 01:00:00	47932	0	2.702	201.2	300.9	-102.4	-2.476
2015-01-06 01:30:00	47933	0	2.751	201	299.9	-101.6	-2.69
2015-01-06 02:00:00	47934	0	2.708	201.5	299.5	-100.8	-2.794
2015-01-06 02:30:00	47935	0	2.715	202.3	299	-99.4	-2.86
2015-01-06 03:00:00	47936	0	2.792	203.2	298	-97.6	-3.094
2015-01-06 03:30:00	47937	0	2.604	204.6	297.2	-95.2	-3.24
2015-01-06 04:00:00	47938	0	2.374	205.7	296.9	-93.6	-3.256
2015-01-06 04:30:00	47939	0	2.322	206	296	-92.3	-3.471
2015-01-06 05:00:00	47940	0	2.529	206.1	295.3	-91.7	-3.585
2015-01-06 05:30:00	47941	0	2.962	205.9	293.3	-90.4	-3.809
2015-01-06 06:00:00	47942	0	3.03	206.5	294.9	-91.4	-3.474
2015-01-06 06:30:00	47943	0	2.539	206.6	294.5	-90.4	-3.283
2015-01-06 07:00:00	47944	0	2.152	206.4	293.2	-89	-3.402
2015-01-06 07:30:00	47945	0.001	2.576	206.9	292.3	-88	-3.362
2015-01-06 08:00:00	47946	7.282	4.199	206.9	291.9	-81.9	-3.461
2015-01-06 08:30:00	47947	43.83	9.38	207.9	296.1	-53.73	-2.307
2015-01-06 09:00:00	47948	132	16.88	209.4	300.8	23.74	0.618
2015-01-06 09:30:00	47949	214.2	21.58	211.4	307	96.9	2.099
2015-01-06 10:00:00	47950	296.6	26.84	213.8	313	170.5	3.128
2015-01-06 10:30:00	47951	333.9	31.01	216.9	320.4	199.4	4.198
2015-01-06 11:00:00	47952	420.2	34.72	219.3	325.4	279.4	4.176
2015-01-06 11:30:00	47953	472	38.05	221.9	330.2	325.7	4.19
2015-01-06 12:00:00	47954	495.1	37.92	224.5	336.2	345.5	5.409
2015-01-06 12:30:00	47955	501.3	40.36	226	338.3	348.6	4.888
2015-01-06 13:00:00	47956	494.7	40.93	226.2	338	342	4.222
2015-01-06 13:30:00	47957	474	36.31	227.1	337.8	326.9	4.733
2015-01-06 14:00:00	47958	437.2	31.69	226.7	336.2	296	4.818
2015-01-06 14:30:00	47959	388.2	24.69	226.6	333	257.1	5.068
2015-01-06 15:00:00	47960	328.2	17.76	226.8	329.1	208.2	5.111
2015-01-06 15:30:00	47961	247.6	11.33	227.5	325.8	138	5.36
2015-01-06 16:00:00	47962	160.6	8.57	227.2	323	56.29	4.856
2015-01-06 16:30:00	47963	67.85	5.244	226.7	320	-30.62	3.848
2015-01-06 17:00:00	47964	14.12	3.237	225.2	316.6	-80.5	2.271
2015-01-06 17:30:00	47965	0.448	2.632	224.7	313.9	-91.4	1.539
2015-01-06 18:00:00	47966	0	2.856	224.6	311.9	-90.1	1.194
2015-01-06 18:30:00	47967	0	3.053	225.4	311.2	-88.9	1.041
2015-01-06 19:00:00	47968	0	2.797	226.5	311.5	-87.7	1.148
2015-01-06 19:30:00	47969	0	2.822	226.9	312.1	-88	1.045
2015-01-06 20:00:00	47970	0	2.727	226	310.4	-87.2	0.598
2015-01-06 20:30:00	47971	0	2.527	227.3	308.5	-83.8	0.255
2015-01-06 21:00:00	47972	0	2.741	226.9	306.1	-82	-0.071
2015-01-06 21:30:00	47973	0	2.934	225.5	304.6	-82	-0.161
2015-01-06 22:00:00	47974	0	2.972	225.3	303.6	-81.3	-0.349
2015-01-06 22:30:00	47975	0	2.591	224.5	303.3	-81.3	-0.345
2015-01-06 23:00:00	47976	0	2.693	226.4	301.6	-77.86	-0.68
2015-01-06 23:30:00	47977	0	2.65	228.9	301.4	-75.09	-0.692
2015-01-07	47978	0	2.083	230.7	302	-73.45	-0.719
2015-01-07 00:30:00	47979	0	2.165	229.5	300.8	-73.38	-1.13
2015-01-07 01:00:00	47980	0	2.545	226.5	299.1	-75.16	-1.601
2015-01-07 01:30:00	47981	0.004	3.003	225.2	298.1	-75.85	-2.196
2015-01-07 02:00:00	47982	0	2.905	223.9	297.9	-76.84	-2.158
2015-01-07 02:30:00	47983	0	2.26	224.4	298.3	-76.12	-1.86
2015-01-07 03:00:00	47984	0	2.547	224.5	296.9	-74.99	-2.119
2015-01-07 03:30:00	47985	0	2.318	224.5	298.4	-76.27	-1.891
2015-01-07 04:00:00	47986	0	1.987	228.1	299.5	-73.45	-1.846
2015-01-07 04:30:00	47987	0	1.728	228.6	299.9	-73.05	-1.944
2015-01-07 05:00:00	47988	0	1.926	224.3	298.3	-75.86	-2.206
2015-01-07 05:30:00	47989	0	1.893	223.9	298.3	-76.26	-2.236
2015-01-07 06:00:00	47990	0	1.736	221.8	297.9	-77.85	-2.351
2015-01-07 06:30:00	47991	0	2.005	219.6	295.3	-77.7	-2.683
2015-01-07 07:00:00	47992	0	2.138	219.2	295.5	-78.42	-2.715
2015-01-07 07:30:00	47993	0.008	2.298	219	294.8	-78.02	-2.79
2015-01-07 08:00:00	47994	8.86	3.974	219.6	294.7	-70.23	-2.854
2015-01-07 08:30:00	47995	51.39	8.94	223.9	298.5	-32.12	-2.131
2015-01-07 09:00:00	47996	124.3	16.15	229.4	303.8	33.73	-0.529
2015-01-07 09:30:00	47997	205.1	22.1	230.9	311	103	1.601
2015-01-07 10:00:00	47998	261.2	24.35	234.1	317.3	153.7	3.358
2015-01-07 10:30:00	47999	279.9	26.93	241.5	323.2	171.2	3.479
2015-01-07 11:00:00	48000	344.4	33.86	246.5	327.9	229.2	3.17
2015-01-07 11:30:00	48001	367.3	35.6	251.3	332.5	250.5	3.565
2015-01-07 12:00:00	48002	321.7	32.73	254.8	332.8	211	3.033
2015-01-07 12:30:00	48003	324.2	31.41	254.3	334.8	212.3	3.679
2015-01-07 13:00:00	48004	322.3	30.92	251.7	335.4	207.7	3.924
2015-01-07 13:30:00	48005	325.3	29.83	247.6	335.6	207.4	4.25
2015-01-07 14:00:00	48006	289	28.61	261.8	337	185.1	4.224
2015-01-07 14:30:00	48007	202.1	20.46	255.8	333.2	104.3	3.804
2015-01-07 15:00:00	48008	185.7	17.21	247.5	330.3	85.7	3.908
2015-01-07 15:30:00	48009	142.1	13.86	245.8	327.7	46.29	3.544
2015-01-07 16:00:00	48010	107	10.8	241.9	324.7	13.37	3.277
2015-01-07 16:30:00	48011	80.6	8.88	236.7	321	-12.55	2.903
2015-01-07 17:00:00	48012	20.34	4.072	228.6	315.9	-70.99	1.962
2015-01-07 17:30:00	48013	0.83	3.006	227.1	311.4	-86.5	0.94
2015-01-07 18:00:00	48014	0	3.244	226.8	309.3	-85.8	0.535
2015-01-07 18:30:00	48015	0	3.274	227	308.5	-84.8	0.408
2015-01-07 19:00:00	48016	0	3.436	227.3	306.8	-83	0.171
2015-01-07 19:30:00	48017	0	3.546	227.5	306.3	-82.3	0.058
2015-01-07 20:00:00	48018	0	3.425	229	306.5	-80.9	0.068
2015-01-07 20:30:00	48019	0	3.292	228.5	305.6	-80.4	-0.015
2015-01-07 21:00:00	48020	0.001	3.382	227.8	304.9	-80.4	-0.122
2015-01-07 21:30:00	48021	0	2.911	227.7	305.4	-80.7	-0.213
2015-01-07 22:00:00	48022	0	2.647	226.9	304.1	-79.88	-0.829
2015-01-07 22:30:00	48023	0	2.78	227.1	303.3	-79.03	-1.217
2015-01-07 23:00:00	48024	0	2.444	227.4	303.5	-78.53	-1.353
2015-01-07 23:30:00	48025	0	2.462	227.1	302.6	-77.96	-1.685
2015-01-08	48026	0	2.685	227.5	300.8	-76.01	-2.003
2015-01-08 00:30:00	48027	0	2.638	227.6	300.3	-75.37	-2.156
2015-01-08 01:00:00	48028	0	2.879	228.2	299.5	-74.19	-2.334
2015-01-08 01:30:00	48029	0	2.851	231.8	299.9	-70.99	-2.292
2015-01-08 02:00:00	48030	0.007	2.086	262.8	303.6	-42.88	-2.123
2015-01-08 02:30:00	48031	0	2.218	244.2	301.9	-59.92	-2.162
2015-01-08 03:00:00	48032	0	1.927	232.1	300.5	-70.33	-2.098
2015-01-08 03:30:00	48033	0	1.782	226.7	297.4	-72.42	-2.916
2015-01-08 04:00:00	48034	0	2.303	226.4	295.2	-71.12	-3.883
2015-01-08 04:30:00	48035	0	2.779	221.9	292.9	-73.74	-4.338
2015-01-08 05:00:00	48036	0	3.003	222	292.1	-73.03	-4.618
2015-01-08 05:30:00	48037	0	2.84	222.2	292	-72.63	-4.62
2015-01-08 06:00:00	48038	0	2.819	222.2	291.1	-71.71	-4.858
2015-01-08 06:30:00	48039	0	2.685	221.4	290.6	-71.9	-4.986
2015-01-08 07:00:00	48040	0	2.607	221.2	289.9	-71.36	-5.132
2015-01-08 07:30:00	48041	0	2.757	221.6	289.8	-71.03	-5.052
2015-01-08 08:00:00	48042	5.309	3.381	221.7	290	-66.4	-4.988
2015-01-08 08:30:00	48043	30.13	6.116	221.9	292.1	-46.26	-4.395
2015-01-08 09:00:00	48044	82.1	11.96	221.6	295.3	-3.654	-3.362
2015-01-08 09:30:00	48045	149	17.87	221.5	299.4	53.26	-2.074
2015-01-08 10:00:00	48046	224	24.12	221	303.6	117.3	-0.97
2015-01-08 10:30:00	48047	274.1	26.87	222.6	310.6	159.3	0.882
2015-01-08 11:00:00	48048	347	29.68	225.4	317.1	225.6	2.691
2015-01-08 11:30:00	48049	390.6	31.86	227.8	322.1	264.4	3.048
2015-01-08 12:00:00	48050	413.4	33	231.4	329	282.8	4.928
2015-01-08 12:30:00	48051	423.9	34.06	235.1	334.4	290.4	5.693
2015-01-08 13:00:00	48052	414.9	34.55	237	336.6	280.7	5.521
2015-01-08 13:30:00	48053	391.1	32.52	239.3	337.9	260	5.651
2015-01-08 14:00:00	48054	335.5	28.65	241	337.5	210.3	5.78
2015-01-08 14:30:00	48055	288.8	24.04	239.9	335	169.7	5.507
2015-01-08 15:00:00	48056	241.5	18.18	239.8	332.8	130.3	5.78
2015-01-08 15:30:00	48057	188.2	13.43	239.9	330.6	84.1	5.892
2015-01-08 16:00:00	48058	124.3	9.97	240	328.5	25.78	5.584
2015-01-08 16:30:00	48059	62.16	6.996	239.7	325.5	-30.64	4.619
2015-01-08 17:00:00	48060	18.08	4.019	238.8	321.5	-68.65	3.436
2015-01-08 17:30:00	48061	1.102	2.929	237.8	317	-81	2.572
2015-01-08 18:00:00	48062	0	2.907	237.3	314.7	-80.4	2.177
2015-01-08 18:30:00	48063	0	3.228	236.9	313.7	-79.99	1.863
2015-01-08 19:00:00	48064	0	2.818	236.9	314.3	-80.2	2.127
2015-01-08 19:30:00	48065	0	3.109	236.7	311.8	-78.14	1.804
2015-01-08 20:00:00	48066	0	2.884	236.6	310.9	-77.17	1.501
2015-01-08 20:30:00	48067	0	2.096	236.4	309.5	-75.23	1.38
2015-01-08 21:00:00	48068	0	2.13	236	308.5	-74.62	1.047
2015-01-08 21:30:00	48069	0	2.254	236.1	307.5	-73.73	0.721
2015-01-08 22:00:00	48070	0	2.704	235.6	305.8	-72.82	-0.129
2015-01-08 22:30:00	48071	0	3.288	234.6	304.3	-72.96	-0.875
2015-01-08 23:00:00	48072	0.001	3.611	233.4	303.6	-73.74	-1.272
2015-01-08 23:30:00	48073	0	3.262	232.3	303.1	-73.99	-1.316
2015-01-09	48074	0	3.382	231.9	302.1	-73.65	-1.449
2015-01-09 00:30:00	48075	0.003	2.792	231.3	302.1	-73.63	-0.971
2015-01-09 01:00:00	48076	0	2.803	230.6	301.3	-73.52	-1.015
2015-01-09 01:30:00	48077	0	2.939	230.4	301	-73.55	-0.859
2015-01-09 02:00:00	48078	0.001	3.346	229.8	300.4	-73.92	-1.098
2015-01-09 02:30:00	48079	0.001	3.534	228.3	300.1	-75.38	-1.325
2015-01-09 03:00:00	48080	0	3.142	224.8	298.3	-76.67	-1.861
2015-01-09 03:30:00	48081	0.149	4.375	224	299	-79.23	-1.757
2015-01-09 04:00:00	48082	0.001	3.555	222.6	301.4	-82.3	-0.566
2015-01-09 04:30:00	48083	0	3.03	222.3	305	-85.7	0.147
2015-01-09 05:00:00	48084	0	2.968	222.3	304.7	-85.4	0.033
2015-01-09 05:30:00	48085	0	3.201	222.3	303	-83.9	-0.491
2015-01-09 06:00:00	48086	0.001	3.388	222.5	302.1	-83.1	-0.694
2015-01-09 06:30:00	48087	0.011	3.043	223	305.6	-85.6	-0.067
2015-01-09 07:00:00	48088	0	2.851	222.5	304.4	-84.8	-0.398
2015-01-09 07:30:00	48089	0.017	2.826	222	306	-86.8	-0.347
2015-01-09 08:00:00	48090	7.702	3.969	221.1	306.3	-81.4	-0.3
2015-01-09 08:30:00	48091	40.08	8.39	221.2	308	-55.1	0.296
2015-01-09 09:00:00	48092	128.1	16.76	221.3	309.7	23.06	2.394
2015-01-09 09:30:00	48093	207.7	21.6	223.5	314.3	95.3	3.676
2015-01-09 10:00:00	48094	290.6	27.03	226.1	321.3	168.4	5.094
2015-01-09 10:30:00	48095	331.8	31.72	228.2	327.8	200.5	5.987
2015-01-09 11:00:00	48096	418.1	35.46	230.5	332.6	280.4	6.089
2015-01-09 11:30:00	48097	469.5	38.75	232.6	337.3	326.2	6.093
2015-01-09 12:00:00	48098	500.9	40.72	233.4	341	352.5	6.286
2015-01-09 12:30:00	48099	517.6	40.99	234.5	345	366.2	7.039
2015-01-09 13:00:00	48100	513.4	40.53	235	346.2	361.7	7.048
2015-01-09 13:30:00	48101	496	37.01	236	346.9	348.1	7.394
2015-01-09 14:00:00	48102	460.1	31.94	236.7	346.8	318	8.12
2015-01-09 14:30:00	48103	410.6	24.83	237.2	345.2	277.9	8.7
2015-01-09 15:00:00	48104	346	16.07	238.2	341.9	226.2	9.43
2015-01-09 15:30:00	48105	270.9	10.44	238	338.3	160.2	9.31
2015-01-09 16:00:00	48106	190.4	6.561	238.4	334.2	87.9	9.19
2015-01-09 16:30:00	48107	112.5	6.337	239.3	333	12.5	8.75
2015-01-09 17:00:00	48108	31.68	3.901	239.1	331.5	-64.65	7.168
2015-01-09 17:30:00	48109	1.6	2.598	238.1	327.1	-90	5.812
2015-01-09 18:00:00	48110	0	2.219	238	323.8	-88	5.788
2015-01-09 18:30:00	48111	0	2.155	237.7	321.9	-86.3	5.665
2015-01-09 19:00:00	48112	0	2.042	236.6	322.7	-88.2	5.057
2015-01-09 19:30:00	48113	0	2.524	235.9	321.8	-88.4	4.486
2015-01-09 20:00:00	48114	0	2.312	236.1	319.9	-86.1	4.334
2015-01-09 20:30:00	48115	0	2.097	237.3	320	-84.8	4.124
2015-01-09 21:00:00	48116	0	1.943	238.3	319.6	-83.2	3.863
2015-01-09 21:30:00	48117	0	2.076	237.4	318	-82.7	3.504
2015-01-09 22:00:00	48118	0	2.595	236.4	316.6	-82.9	2.945
2015-01-09 22:30:00	48119	0	2.672	235.2	317.6	-85.1	2.614
2015-01-09 23:00:00	48120	0	2.871	234.6	315.8	-84.1	2.237
2015-01-09 23:30:00	48121	0	2.991	233.7	314	-83.3	1.875
2015-01-10	48122	0	2.714	233.1	315.5	-85.1	2.238
2015-01-10 00:30:00	48123	0	2.656	232.7	315.4	-85.3	2.166
2015-01-10 01:00:00	48124	0	2.618	232.4	311.7	-82	1.902
2015-01-10 01:30:00	48125	0	3.047	231.1	309.1	-81	1.415
2015-01-10 02:00:00	48126	0	3.188	230.4	307.4	-80.2	0.776
2015-01-10 02:30:00	48127	0	4.044	229.7	305.5	-79.87	0.325
2015-01-10 03:00:00	48128	0	3.245	228.4	304.3	-79.06	-0.128
2015-01-10 03:30:00	48129	0.001	3.673	226.9	303	-79.78	-0.593
2015-01-10 04:00:00	48130	0.001	3.449	226.6	301.4	-78.28	-0.439
2015-01-10 04:30:00	48131	0	2.974	225.9	300.5	-77.57	-0.998
2015-01-10 05:00:00	48132	0	3.099	225.1	298.8	-76.86	-1.399
2015-01-10 05:30:00	48133	0.014	3.822	224.7	298.7	-77.85	-1.658
2015-01-10 06:00:00	48134	0.063	4.016	225.3	299.2	-77.85	-1.231
2015-01-10 06:30:00	48135	0	3.002	225	299.8	-77.81	-1.033
2015-01-10 07:00:00	48136	0	2.783	224.6	299.2	-77.37	-1.403
2015-01-10 07:30:00	48137	0.004	2.584	223.8	297.6	-76.39	-1.996
2015-01-10 08:00:00	48138	3.447	3.348	224	297.4	-73.33	-2.457
2015-01-10 08:30:00	48139	20.07	6.113	225	297.2	-58.21	-2.827
2015-01-10 09:00:00	48140	100.5	16.41	227.4	301.8	9.63	-0.457
2015-01-10 09:30:00	48141	187.1	21.23	231.8	311.6	86	3.753
2015-01-10 10:00:00	48142	257.3	23.93	235.6	320.6	148.3	6.184
2015-01-10 10:30:00	48143	304.6	30	240.7	331	184.3	7.721
2015-01-10 11:00:00	48144	376.3	32.42	246.3	341.2	249	9.46
2015-01-10 11:30:00	48145	417.9	34.91	250.7	348.7	284.9	10.26
2015-01-10 12:00:00	48146	450.7	38.36	253.3	355.2	310.4	10.5
2015-01-10 12:30:00	48147	464	37.72	257.7	363.2	320.8	12.45
2015-01-10 13:00:00	48148	453.4	37.04	260.4	366.5	310.2	12.8
2015-01-10 13:30:00	48149	446.5	35	260.3	366.8	305	12.65
2015-01-10 14:00:00	48150	377.5	28.39	262.3	367	244.4	13.38
2015-01-10 14:30:00	48151	360.1	23.85	264.2	366.3	234	14.08
2015-01-10 15:00:00	48152	321	20.16	264.3	364.3	200.8	13.82
2015-01-10 15:30:00	48153	244.6	15.4	263.8	361.6	131.3	13.41
2015-01-10 16:00:00	48154	157.4	10.87	264.4	358.8	52.15	13.14
2015-01-10 16:30:00	48155	78.97	7.67	264.1	354.9	-19.48	12.33
2015-01-10 17:00:00	48156	25.9	4.231	263.2	349	-64.12	11.32
2015-01-10 17:30:00	48157	2.052	2.334	261.6	344	-82.7	10.17
2015-01-10 18:00:00	48158	0	1.422	259.1	340.1	-82.4	8.97
2015-01-10 18:30:00	48159	0	2.398	257.8	335	-79.64	7.785
2015-01-10 19:00:00	48160	0	2.857	256.7	331.1	-77.23	6.855
2015-01-10 19:30:00	48161	0.001	3.246	256.1	329	-76.1	6.309
2015-01-10 20:00:00	48162	0.001	3.476	255.3	327.4	-75.49	6.152
2015-01-10 20:30:00	48163	0	3.401	254.9	325.9	-74.33	5.817
2015-01-10 21:00:00	48164	0	2.312	254.9	327.5	-74.94	6.352
2015-01-10 21:30:00	48165	0	2.056	252.6	325.4	-74.79	5.956
2015-01-10 22:00:00	48166	0	2.655	252	323.1	-73.67	5.59
2015-01-10 22:30:00	48167	0	2.512	250.4	321.8	-73.91	5.425
2015-01-10 23:00:00	48168	0	1.822	248.1	323.5	-77.21	5.503
2015-01-10 23:30:00	48169	0	1.903	246.2	323.3	-79.08	5.134
2015-01-11	48170	0	1.875	244.6	324.5	-81.7	4.881
2015-01-11 00:30:00	48171	0	1.566	243.2	324.2	-82.5	4.471
2015-01-11 01:00:00	48172	0	1.575	242.3	322.7	-81.9	3.965
2015-01-11 01:30:00	48173	0	1.363	240.1	321.3	-82.6	3.478
2015-01-11 02:00:00	48174	0	1.326	238.1	320.4	-83.7	2.988
2015-01-11 02:30:00	48175	0	1.316	236.8	319.2	-83.7	2.639
2015-01-11 03:00:00	48176	0	1.368	236	318.7	-84	2.478
2015-01-11 03:30:00	48177	0	1.363	234.8	317.5	-84.1	2.21
2015-01-11 04:00:00	48178	0	1.472	233.5	315.7	-83.7	1.831
2015-01-11 04:30:00	48179	0	1.457	232.3	314.4	-83.6	1.503
2015-01-11 05:00:00	48180	0	1.503	230.8	312.4	-83.1	1.031
2015-01-11 05:30:00	48181	0	1.556	230	311.4	-83	0.773
2015-01-11 06:00:00	48182	0	1.707	229.4	310	-82.2	0.468
2015-01-11 06:30:00	48183	0	1.44	229.5	310	-81.9	0.259
2015-01-11 07:00:00	48184	0	1.53	228.9	308.9	-81.6	-0.083
2015-01-11 07:30:00	48185	0.001	1.824	226.9	306.3	-81.2	-0.568
2015-01-11 08:00:00	48186	8.65	3.436	225.7	304.5	-73.61	-0.79
2015-01-11 08:30:00	48187	40.77	8.03	225.3	303.2	-45.22	-0.813
2015-01-11 09:00:00	48188	116.8	14.97	226.3	307.8	20.33	1.711
2015-01-11 09:30:00	48189	194.6	18.63	228.7	315.1	89.6	4.2
2015-01-11 10:00:00	48190	271.1	23.96	231.1	321.8	156.4	5.301
2015-01-11 10:30:00	48191	310.5	26.1	234.4	328.8	190	6.729
2015-01-11 11:00:00	48192	391	31.1	236.4	333.6	262.6	6.379
2015-01-11 11:30:00	48193	442	34.11	238.2	338	308	6.489
2015-01-11 12:00:00	48194	472.3	37.28	239.4	341.6	332.8	6.314
2015-01-11 12:30:00	48195	480.8	37.77	241.7	345.8	339	7.174
2015-01-11 13:00:00	48196	477.1	37.48	243.3	347.5	335.4	7.171
2015-01-11 13:30:00	48197	452.2	34.64	244.8	347.7	314.7	7.198
2015-01-11 14:00:00	48198	414.5	31.57	244.4	345.6	281.7	6.835
2015-01-11 14:30:00	48199	366.3	24.46	244.9	343.4	243.3	7.298
2015-01-11 15:00:00	48200	309.3	17.52	245	340.1	196.6	7.69
2015-01-11 15:30:00	48201	243.2	13.1	243.9	335.9	138.1	7.042
2015-01-11 16:00:00	48202	165.3	8.11	244	332.6	68.65	7.143
2015-01-11 16:30:00	48203	82	5.67	243.6	329.2	-9.26	6.013
2015-01-11 17:00:00	48204	21.67	3.593	243.4	325.2	-63.77	4.38
2015-01-11 17:30:00	48205	1.566	2.831	244.6	321.9	-78.61	3.331
2015-01-11 18:00:00	48206	0	2.838	245.4	320.7	-78.17	2.977
2015-01-11 18:30:00	48207	0	3.018	245.5	319	-76.5	2.75
2015-01-11 19:00:00	48208	0	2.832	245.1	319.7	-77.43	2.751
2015-01-11 19:30:00	48209	0	2.795	244.7	318.6	-76.7	2.587
2015-01-11 20:00:00	48210	0	2.969	244.1	317.8	-76.67	2.325
2015-01-11 20:30:00	48211	0	2.968	243.6	316.3	-75.67	2.11
2015-01-11 21:00:00	48212	0.003	2.992	243.2	315.3	-75.1	1.915
2015-01-11 21:30:00	48213	0	2.613	242.4	315.7	-75.9	1.962
2015-01-11 22:00:00	48214	0	2.871	241.6	314.7	-75.91	1.657
2015-01-11 22:30:00	48215	0	3.043	240.8	313.8	-76.06	1.437
2015-01-11 23:00:00	48216	0	2.345	239.8	313.7	-76.22	1.277
2015-01-11 23:30:00	48217	0	1.768	236.9	311.4	-76.3	0.477
2015-01-12	48218	0	2.292	235.1	308.3	-75.54	-0.236
2015-01-12 00:30:00	48219	0	2.423	233.6	307.2	-76.03	-0.696
2015-01-12 01:00:00	48220	0	2.655	232.8	305.8	-75.68	-0.985
2015-01-12 01:30:00	48221	0	2.818	232.8	304.6	-74.63	-1.051
2015-01-12 02:00:00	48222	0	2.842	232.7	304.3	-74.41	-0.979
2015-01-12 02:30:00	48223	0	2.925	232.9	303.3	-73.33	-1.077
2015-01-12 03:00:00	48224	0	2.446	232.7	303.9	-73.67	-1.094
2015-01-12 03:30:00	48225	0	2.44	232.5	303	-73.02	-1.236
2015-01-12 04:00:00	48226	0	2.678	232.3	302.8	-73.25	-1.502
2015-01-12 04:30:00	48227	0	2.507	231.9	303.3	-73.85	-1.467
2015-01-12 05:00:00	48228	0	2.324	231	301.7	-72.99	-1.562
2015-01-12 05:30:00	48229	0	2.295	229.9	300.2	-72.63	-1.778
2015-01-12 06:00:00	48230	0	2.66	229.3	298.8	-72.13	-2.211
2015-01-12 06:30:00	48231	0	2.559	229.1	298.6	-72.12	-2.424
2015-01-12 07:00:00	48232	0	2.451	228.3	297.8	-71.97	-2.611
2015-01-12 07:30:00	48233	0	2.857	227.4	296.1	-71.65	-3.401
2015-01-12 08:00:00	48234	5.107	3.686	225.8	296	-68.75	-3.603
2015-01-12 08:30:00	48235	31.07	6.935	225.6	296.8	-47	-3.578
2015-01-12 09:00:00	48236	76.43	12.06	225.8	299.6	-9.43	-2.554
2015-01-12 09:30:00	48237	127.9	16.76	226.5	303.6	34	-1.338
2015-01-12 10:00:00	48238	180.2	21.38	227.8	307.9	78.7	-0.321
2015-01-12 10:30:00	48239	225.8	26.03	230.1	312.6	117.2	0.702
2015-01-12 11:00:00	48240	282.5	29.66	232.7	317.8	167.8	1.889
2015-01-12 11:30:00	48241	327.3	31.2	235.2	323.1	208.1	3.065
2015-01-12 12:00:00	48242	367.4	35.08	236.6	327.5	241.5	3.416
2015-01-12 12:30:00	48243	387.1	36.6	237.2	330.7	257	3.737
2015-01-12 13:00:00	48244	393.3	38.89	236.9	331.1	260.2	2.88
2015-01-12 13:30:00	48245	377.5	36.36	236	332.1	245.1	3.133
2015-01-12 14:00:00	48246	349.1	32.71	235.9	332.2	220	3.5
2015-01-12 14:30:00	48247	310.9	26.33	235.5	332.4	187.7	4.501
2015-01-12 15:00:00	48248	259.8	20.26	235.8	330	145.4	4.607
2015-01-12 15:30:00	48249	208.6	15.04	235.8	327.3	102	4.481
2015-01-12 16:00:00	48250	140.4	10.67	235.3	324.4	40.61	4.167
2015-01-12 16:30:00	48251	76.25	7.114	234.5	321.6	-17.92	3.741
2015-01-12 17:00:00	48252	24.69	3.887	235.3	317.7	-61.56	2.408
2015-01-12 17:30:00	48253	1.354	2.228	235.7	313.4	-78.51	0.729
2015-01-12 18:00:00	48254	0	2.358	233.1	310.6	-79.86	-0.117
2015-01-12 18:30:00	48255	0	2.628	231.8	307.6	-78.47	-0.618
2015-01-12 19:00:00	48256	0	2.916	231.5	306	-77.41	-1.009
2015-01-12 19:30:00	48257	0	3.194	231.7	305.4	-76.83	-1.385
2015-01-12 20:00:00	48258	0	3.272	238.2	305.6	-70.67	-1.424
2015-01-12 20:30:00	48259	0.063	2.972	253.6	306.7	-55.99	-1.103
2015-01-12 21:00:00	48260	0.001	2.379	247.9	307	-61.48	-0.886
2015-01-12 21:30:00	48261	0	2.568	246.3	305.6	-61.93	-1.026
2015-01-12 22:00:00	48262	0	2.099	250.3	305.7	-57.57	-0.773
2015-01-12 22:30:00	48263	0	1.832	252.1	306.4	-56.09	-0.446
2015-01-12 23:00:00	48264	0	2.036	247.8	305.6	-59.88	-0.733
2015-01-12 23:30:00	48265	0	2.084	246.9	304.3	-59.4	-1.213
2015-01-13	48266	0	2.232	250	303.2	-55.5	-1.814
2015-01-13 00:30:00	48267	0	2.237	247.8	302.2	-56.64	-2.207
2015-01-13 01:00:00	48268	0	2.43	246.6	301.7	-57.5	-2.538
2015-01-13 01:30:00	48269	0	2.444	250.7	301.2	-52.99	-2.638
2015-01-13 02:00:00	48270	0	2.168	251	301.4	-52.57	-2.744
2015-01-13 02:30:00	48271	0	2.263	239.3	300.1	-63.01	-2.857
2015-01-13 03:00:00	48272	0	2.215	235.2	298.9	-65.85	-3.049
2015-01-13 03:30:00	48273	0	2.275	237.7	298.3	-62.81	-3.288
2015-01-13 04:00:00	48274	0	2.13	243.2	298.5	-57.43	-3.319
2015-01-13 04:30:00	48275	0	1.938	243.9	298.4	-56.44	-3.33
2015-01-13 05:00:00	48276	0	2.015	245.9	298.2	-54.27	-3.511
2015-01-13 05:30:00	48277	0	1.86	244	298	-55.77	-3.581
2015-01-13 06:00:00	48278	0	1.954	233.5	296.6	-65.05	-3.721
2015-01-13 06:30:00	48279	0	2.25	239.1	296.1	-59.25	-3.99
2015-01-13 07:00:00	48280	0.001	2.209	244.3	296.8	-54.68	-3.931
2015-01-13 07:30:00	48281	0.001	2.185	238.4	295.9	-59.77	-3.806
2015-01-13 08:00:00	48282	3.836	2.849	233.6	295.8	-61.17	-3.73
2015-01-13 08:30:00	48283	23.67	5.086	231.5	296.9	-46.83	-3.587
2015-01-13 09:00:00	48284	49.78	8.01	230.2	298.5	-26.49	-3.177
2015-01-13 09:30:00	48285	127.9	16.37	230.4	303	38.86	-1.895
2015-01-13 10:00:00	48286	185.8	21.39	231.1	307.1	88.4	-0.833
2015-01-13 10:30:00	48287	237.4	26.42	232.2	311.6	131.6	0.266
2015-01-13 11:00:00	48288	299.5	30.62	234.2	316.4	186.6	1.227
2015-01-13 11:30:00	48289	342.9	32.59	236.6	321.1	225.8	2.39
2015-01-13 12:00:00	48290	369.8	34.89	238.3	324.6	248.6	2.288
2015-01-13 12:30:00	48291	384.5	35.64	240	328	260.9	2.926
2015-01-13 13:00:00	48292	378	35.89	240.8	329.2	253.7	2.825
2015-01-13 13:30:00	48293	352.2	33.8	241.4	329.5	230.3	2.725
2015-01-13 14:00:00	48294	313.4	29.64	243	329.9	196.9	3.175
2015-01-13 14:30:00	48295	263.1	24.24	244.4	328.9	154.4	3.458
2015-01-13 15:00:00	48296	211.2	19.34	245.1	327.2	109.8	3.411
2015-01-13 15:30:00	48297	159.9	15.33	245.3	324.9	64.94	2.997
2015-01-13 16:00:00	48298	104.7	11.23	244.7	321.9	16.23	2.304
2015-01-13 16:30:00	48299	55.35	7.564	244.5	319.1	-26.8	1.652
2015-01-13 17:00:00	48300	19.45	4.25	244.4	316.2	-56.51	1.088
2015-01-13 17:30:00	48301	1.796	2.395	243.9	313.8	-70.44	0.812
2015-01-13 18:00:00	48302	0	2.011	243.8	312.6	-70.89	0.782
2015-01-13 18:30:00	48303	0	1.873	243.8	312.8	-70.84	0.869
2015-01-13 19:00:00	48304	0	2.47	243.5	311	-69.98	0.563
2015-01-13 19:30:00	48305	0	2.664	242.4	309.5	-69.74	0.405
2015-01-13 20:00:00	48306	0	2.486	241.8	309.2	-69.91	0.449
2015-01-13 20:30:00	48307	0	2.177	241.1	308.5	-69.53	-0.115
2015-01-13 21:00:00	48308	0	2.612	240.3	307.1	-69.46	-0.639
2015-01-13 21:30:00	48309	0	2.943	239.7	305.8	-69	-1.143
2015-01-13 22:00:00	48310	0	3.019	238.9	304.7	-68.84	-1.375
2015-01-13 22:30:00	48311	0	2.901	238.4	303.8	-68.34	-1.552
2015-01-13 23:00:00	48312	0	2.662	237.8	303.7	-68.52	-1.564
2015-01-13 23:30:00	48313	0	2.633	237.4	302.4	-67.61	-1.898
2015-01-14	48314	0	2.672	237.2	301.7	-67.26	-2.076
2015-01-14 00:30:00	48315	0	2.792	236.2	301	-67.61	-2.31
2015-01-14 01:00:00	48316	0	2.658	235.8	300.4	-67.2	-2.306
2015-01-14 01:30:00	48317	0	2.456	235.2	299.9	-67.17	-2.322
2015-01-14 02:00:00	48318	0	2.315	237.4	299.9	-64.85	-2.365
2015-01-14 02:30:00	48319	0	2.098	241.9	299.7	-59.89	-2.44
2015-01-14 03:00:00	48320	0	1.895	245.8	300.4	-56.51	-2.526
2015-01-14 03:30:00	48321	0.132	1.281	279.3	303.5	-25.39	-2.441
2015-01-14 04:00:00	48322	0.037	0.688	290.6	305.9	-15.94	-2.104
2015-01-14 04:30:00	48323	0.031	0.543	294.4	306.9	-13.02	-1.973
2015-01-14 05:00:00	48324	0.017	0.471	295.1	307.4	-12.76	-1.91
2015-01-14 05:30:00	48325	0.012	0.435	295.1	307.6	-12.84	-1.912
2015-01-14 06:00:00	48326	0.011	0.401	295.5	307.7	-12.61	-1.934
2015-01-14 06:30:00	48327	0.01	0.43	295.7	307.8	-12.51	-1.955
2015-01-14 07:00:00	48328	0.055	0.61	296.3	308.5	-12.74	-1.799
2015-01-14 07:30:00	48329	0.038	0.534	296.1	309	-13.47	-1.62
2015-01-14 08:00:00	48330	0.979	0.678	297.1	309.7	-12.28	-1.492
2015-01-14 08:30:00	48331	8.94	1.87	299	311	-4.893	-1.258
2015-01-14 09:00:00	48332	21.82	3.525	298.1	313	3.372	-0.782
2015-01-14 09:30:00	48333	21.32	3.233	299.1	313.9	3.254	-0.521
2015-01-14 10:00:00	48334	21.94	3.104	300.3	314	5.187	-0.559
2015-01-14 10:30:00	48335	47.51	6.54	300.4	315.3	26.09	-0.454
2015-01-14 11:00:00	48336	32.35	4.242	301.6	314.4	15.3	-0.45
2015-01-14 11:30:00	48337	45.13	5.897	300.7	315.4	24.56	-0.385
2015-01-14 12:00:00	48338	37.19	4.841	300.9	315.6	17.58	-0.35
2015-01-14 12:30:00	48339	41.71	5.535	301.3	316.7	20.78	-0.123
2015-01-14 13:00:00	48340	29.27	3.903	301.2	315.9	10.74	-0.246
2015-01-14 13:30:00	48341	65.26	8.77	300.4	317.3	39.59	-0.131
2015-01-14 14:00:00	48342	110.2	14.52	297.2	320.5	72.43	0.563
2015-01-14 14:30:00	48343	70.58	9.29	293.8	320.6	34.56	0.704
2015-01-14 15:00:00	48344	61.17	8.41	297.8	321.1	29.47	0.76
2015-01-14 15:30:00	48345	55.88	7.657	293.9	321.6	20.53	1.098
2015-01-14 16:00:00	48346	36.97	5.209	298.1	321.2	8.71	1.086
2015-01-14 16:30:00	48347	20.57	3.267	299.2	320.6	-4.099	1.052
2015-01-14 17:00:00	48348	8.08	1.818	299.4	319.6	-13.9	0.922
2015-01-14 17:30:00	48349	0.88	0.892	303.9	319.6	-15.71	0.963
2015-01-14 18:00:00	48350	0.03	0.863	297.4	318.9	-22.34	0.981
2015-01-14 18:30:00	48351	0	1.496	276.7	315.8	-40.59	0.677
2015-01-14 19:00:00	48352	0.072	1.663	289.4	316.7	-28.91	0.692
2015-01-14 19:30:00	48353	0.025	0.873	301.6	318.8	-18.03	0.932
2015-01-14 20:00:00	48354	0.005	0.587	301.3	318.6	-17.91	0.969
2015-01-14 20:30:00	48355	0.003	0.609	300.2	318.1	-18.47	0.777
2015-01-14 21:00:00	48356	0	1.336	271.8	314.6	-44.12	0.51
2015-01-14 21:30:00	48357	0	2.202	251.1	311	-62.04	0.014
2015-01-14 22:00:00	48358	0	2.172	251.6	309.7	-60.36	-0.206
2015-01-14 22:30:00	48359	0	2.345	248.1	307.7	-62.03	-0.539
2015-01-14 23:00:00	48360	0	2.737	248.5	306.3	-60.46	-1.151
2015-01-14 23:30:00	48361	0	2.718	246.2	305.4	-61.97	-1.011
2015-01-15	48362	0	2.614	244.9	304.5	-62.27	-1.106
2015-01-15 00:30:00	48363	0	2.635	243.9	304.2	-62.92	-1.252
2015-01-15 01:00:00	48364	0	2.607	242.9	303	-62.73	-1.577
2015-01-15 01:30:00	48365	0.009	2.653	242.4	301.9	-62.12	-2.306
2015-01-15 02:00:00	48366	0	3.469	242.1	301.5	-62.87	-2.213
2015-01-15 02:30:00	48367	0	3.033	242	301.5	-62.62	-2.096
2015-01-15 03:00:00	48368	0	3.025	241.5	300.8	-62.29	-2.038
2015-01-15 03:30:00	48369	0	2.722	240.6	300	-62.17	-2.144
2015-01-15 04:00:00	48370	0.001	3.109	239.5	299.8	-63.44	-2.571
2015-01-15 04:30:00	48371	0	3.025	239	298.8	-62.83	-2.854
2015-01-15 05:00:00	48372	0	3.006	239	298.7	-62.67	-2.517
2015-01-15 05:30:00	48373	0	2.417	239.1	298.2	-61.44	-2.433
2015-01-15 06:00:00	48374	0	1.936	239.5	298.3	-60.76	-2.282
2015-01-15 06:30:00	48375	0	1.853	239.8	298.4	-60.49	-2.316
2015-01-15 07:00:00	48376	0	1.952	239.6	298.2	-60.56	-2.517
2015-01-15 07:30:00	48377	0.007	1.781	239.7	298.5	-60.6	-2.625
2015-01-15 08:00:00	48378	9.08	3.51	240.7	298.4	-52.13	-2.901
2015-01-15 08:30:00	48379	38.14	6.918	245.9	301.1	-24.02	-2.501
2015-01-15 09:00:00	48380	69.06	10.21	251.4	304.8	5.45	-1.896
2015-01-15 09:30:00	48381	91.8	12.39	255.3	307.5	27.21	-1.566
2015-01-15 10:00:00	48382	106	13.77	252.4	309.2	35.4	-1.28
2015-01-15 10:30:00	48383	145.1	18.46	254	311.5	69.08	-0.973
2015-01-15 11:00:00	48384	159.8	19.62	262.7	315.5	87.3	-0.262
2015-01-15 11:30:00	48385	206.6	25.45	266.7	319.9	128	0.435
2015-01-15 12:00:00	48386	238.2	27.94	257.6	323.5	144.4	1.758
2015-01-15 12:30:00	48387	249.4	29.34	263.2	326.3	157	2.236
2015-01-15 13:00:00	48388	167.8	20.54	270.7	325.2	92.8	1.722
2015-01-15 13:30:00	48389	155.4	20.98	277.7	325.1	87	1.332
2015-01-15 14:00:00	48390	117.9	16.79	285.2	324.4	61.99	1.203
2015-01-15 14:30:00	48391	72.22	10.58	294.9	323.4	33.13	1.203
2015-01-15 15:00:00	48392	70.52	10.36	289.6	322.2	27.53	1.201
2015-01-15 15:30:00	48393	73.23	10.64	288	321.7	28.86	1.049
2015-01-15 16:00:00	48394	51.29	7.811	271.1	319	-4.386	0.778
2015-01-15 16:30:00	48395	33.86	5.851	276.2	318.1	-13.9	0.541
2015-01-15 17:00:00	48396	12.71	2.931	283.7	318.2	-24.78	0.679
2015-01-15 17:30:00	48397	1.318	1.256	286.1	316.7	-30.53	0.529
2015-01-15 18:00:00	48398	0.005	0.902	297.2	316.7	-20.35	0.247
2015-01-15 18:30:00	48399	0.019	0.769	298.8	316.6	-18.51	0.191
2015-01-15 19:00:00	48400	0.002	1.28	277.8	314.6	-38.03	0.105
2015-01-15 19:30:00	48401	0	2.316	246.7	308.7	-64.34	-0.692
2015-01-15 20:00:00	48402	0	2.378	244.9	307	-64.51	-0.946
2015-01-15 20:30:00	48403	0	2.103	244.7	306.8	-64.2	-0.788
2015-01-15 21:00:00	48404	0	2.325	243.6	305.2	-63.92	-1.202
2015-01-15 21:30:00	48405	0	2.072	243.3	305	-63.73	-1.262
2015-01-15 22:00:00	48406	0	2.033	242.9	304.2	-63.36	-1.664
2015-01-15 22:30:00	48407	0	1.735	241.8	303.8	-63.75	-1.886
2015-01-15 23:00:00	48408	0	1.742	241.7	302.1	-62.12	-2.209
2015-01-15 23:30:00	48409	0	2.359	241.5	301	-61.86	-2.624
2015-01-16	48410	0.001	2.095	251.3	301.7	-52.5	-2.633
2015-01-16 00:30:00	48411	0	1.644	244	300.6	-58.33	-2.686
2015-01-16 01:00:00	48412	0.03	1.778	267.3	302.4	-36.86	-2.738
2015-01-16 01:30:00	48413	0.001	2.281	242.1	301	-61.18	-2.565
2015-01-16 02:00:00	48414	0	2.418	236	299.2	-65.62	-2.747
2015-01-16 02:30:00	48415	0	2.634	231.8	297.4	-68.26	-3.271
2015-01-16 03:00:00	48416	0.004	3.329	230.9	299.1	-71.53	-2.843
2015-01-16 03:30:00	48417	0.044	2.901	230.8	299.9	-71.98	-2.054
2015-01-16 04:00:00	48418	0.012	3.867	228.6	299.7	-75.04	-2
2015-01-16 04:30:00	48419	0.041	3.439	227.3	304.2	-80.4	-0.736
2015-01-16 05:00:00	48420	0	1.578	226.9	309.1	-83.8	0.421
2015-01-16 05:30:00	48421	0	1.557	226.1	309.7	-85.1	0.3
2015-01-16 06:00:00	48422	0	1.627	225.4	309.5	-85.7	0.175
2015-01-16 06:30:00	48423	0	1.666	224.8	309.2	-86	0.017
2015-01-16 07:00:00	48424	0	1.978	225	307.9	-85	-0.391
2015-01-16 07:30:00	48425	0.003	2.243	224	306.7	-84.9	-0.716
2015-01-16 08:00:00	48426	9.77	3.72	222.8	306.4	-77.6	-0.831
2015-01-16 08:30:00	48427	49.4	8.88	222.1	306.4	-43.77	-0.464
2015-01-16 09:00:00	48428	128.6	17.21	222.6	308.1	25.89	0.589
2015-01-16 09:30:00	48429	203	22.95	222	310.5	91.6	1.215
2015-01-16 10:00:00	48430	278	27.73	222.4	313.7	159	1.839
2015-01-16 10:30:00	48431	327.2	34.72	223.2	316.4	199.3	1.749
2015-01-16 11:00:00	48432	409	41.33	223.1	318.1	272.7	1.02
2015-01-16 11:30:00	48433	463	44.32	223.7	320.7	321.6	1.155
2015-01-16 12:00:00	48434	485.2	44.52	224.8	324.4	341.1	1.663
2015-01-16 12:30:00	48435	496.2	46.05	225.5	325.9	349.6	1.506
2015-01-16 13:00:00	48436	494.3	46.01	225.9	326.4	347.8	1.401
2015-01-16 13:30:00	48437	485.5	43.2	226.6	327.5	341.4	1.837
2015-01-16 14:00:00	48438	457.9	39.08	227.3	328	318.1	2.292
2015-01-16 14:30:00	48439	417.7	33.14	227.1	326.1	285.6	2.578
2015-01-16 15:00:00	48440	367.1	25.4	226.7	324	244.3	2.993
2015-01-16 15:30:00	48441	296.1	19.11	226	320.8	182.2	2.838
2015-01-16 16:00:00	48442	218.2	13.78	225.3	318.2	111.6	2.677
2015-01-16 16:30:00	48443	135.2	10.79	224	315.7	32.72	2.143
2015-01-16 17:00:00	48444	46.98	5.889	223	314.3	-50.12	1.258
2015-01-16 17:30:00	48445	5.332	2.375	221.8	312.7	-87.9	0.316
2015-01-16 18:00:00	48446	0	1.504	221.4	311.7	-91.8	0.183
2015-01-16 18:30:00	48447	0	1.617	221.3	310.5	-90.9	0.007
2015-01-16 19:00:00	48448	0	1.77	220.6	309.4	-90.6	-0.29
2015-01-16 19:30:00	48449	0	1.922	219.5	307.7	-90.1	-0.653
2015-01-16 20:00:00	48450	0	2.152	218.6	306.2	-89.8	-1.009
2015-01-16 20:30:00	48451	0	2.319	218.1	305.8	-90	-1.176
2015-01-16 21:00:00	48452	0	2.777	217.5	302.6	-87.9	-1.804
2015-01-16 21:30:00	48453	0	2.603	216.7	302.1	-88	-2.01
2015-01-16 22:00:00	48454	0	2.459	215.9	301.6	-88.2	-2.195
2015-01-16 22:30:00	48455	0	2.568	215.3	300.7	-88	-2.483
2015-01-16 23:00:00	48456	0	2.583	214.6	300	-88	-2.679
2015-01-16 23:30:00	48457	0	2.256	213.9	299.2	-87.5	-2.701
2015-01-17	48458	0	2.462	212.9	298	-87.6	-3.102
2015-01-17 00:30:00	48459	0	2.238	212	296.8	-87	-3.254
2015-01-17 01:00:00	48460	0	1.962	210.7	295.4	-86.6	-3.619
2015-01-17 01:30:00	48461	0	2.19	210.2	294.2	-86.3	-3.928
2015-01-17 02:00:00	48462	0	2.474	210	293.8	-86.3	-3.956
2015-01-17 02:30:00	48463	0	1.714	209	291.9	-84.6	-4.183
2015-01-17 03:00:00	48464	0	1.647	206.7	288.6	-83.6	-5.245
2015-01-17 03:30:00	48465	0	1.994	206.3	287.3	-83	-5.53
2015-01-17 04:00:00	48466	0	1.988	206.3	287	-82.6	-5.627
2015-01-17 04:30:00	48467	0	1.926	206.5	286.4	-81.9	-5.74
2015-01-17 05:00:00	48468	0	1.829	206.5	285.8	-81.2	-5.852
2015-01-17 05:30:00	48469	0	2.245	206.7	284	-79.56	-6.133
2015-01-17 06:00:00	48470	0	2.73	207.1	283.1	-78.64	-6.356
2015-01-17 06:30:00	48471	0	3.027	207.3	282.5	-78.22	-6.602
2015-01-17 07:00:00	48472	0	3.085	207.4	282	-77.71	-6.612
2015-01-17 07:30:00	48473	0.023	2.756	207.8	282.1	-77.07	-6.341
2015-01-17 08:00:00	48474	11.38	4.425	208.1	282.8	-67.66	-6.062
2015-01-17 08:30:00	48475	48.33	8.8	208.5	285	-37.02	-5.171
2015-01-17 09:00:00	48476	129	15.83	209.9	289.3	33.81	-3.04
2015-01-17 09:30:00	48477	219.6	22.68	215.7	296.6	116	-1.432
2015-01-17 10:00:00	48478	279.6	26.38	225.6	304.9	173.9	-0.054
2015-01-17 10:30:00	48479	371.1	37.02	231.6	313.5	252.3	1.071
2015-01-17 11:00:00	48480	327.7	30.4	226.3	315.8	207.8	1.167
2015-01-17 11:30:00	48481	421.6	39.6	226	319.7	288.4	1.108
2015-01-17 12:00:00	48482	457.5	43.73	231	324	320.7	1.374
2015-01-17 12:30:00	48483	441.6	40.88	230	326.3	304.4	1.957
2015-01-17 13:00:00	48484	387.3	36.05	232.3	326.8	256.8	2.135
2015-01-17 13:30:00	48485	442.4	42.51	235.8	329.4	306.3	2.2
2015-01-17 14:00:00	48486	423.9	37.87	236.2	331.6	290.6	3.403
2015-01-17 14:30:00	48487	353.7	31.17	242.3	331.9	232.8	3.942
2015-01-17 15:00:00	48488	252.5	21.1	240.2	327.6	144	3.7
2015-01-17 15:30:00	48489	207.9	20.6	251.8	326.3	112.8	2.787
2015-01-17 16:00:00	48490	163.9	16.14	252.5	325.1	75.12	2.924
2015-01-17 16:30:00	48491	72.23	8.55	248.3	320.9	-8.93	2.226
2015-01-17 17:00:00	48492	28.8	5.323	240.5	315.8	-51.82	1.332
2015-01-17 17:30:00	48493	4.075	2.954	238.5	312.4	-72.77	0.854
2015-01-17 18:00:00	48494	0.001	2.589	242	311.4	-72.07	0.697
2015-01-17 18:30:00	48495	0	2.72	241.9	310	-70.73	0.678
2015-01-17 19:00:00	48496	0	2.458	243.5	309.2	-68.15	0.757
2015-01-17 19:30:00	48497	0	2.264	250.4	310	-61.9	0.779
2015-01-17 20:00:00	48498	0	2.356	246.1	308.1	-64.29	0.595
2015-01-17 20:30:00	48499	0	1.738	267.6	309.4	-43.57	0.111
2015-01-17 21:00:00	48500	0.002	1.537	280.9	311.1	-31.72	-0.014
2015-01-17 21:30:00	48501	0.003	1.302	283.1	312	-30.23	-0.036
2015-01-17 22:00:00	48502	0	1.182	273.5	310	-37.73	-0.449
2015-01-17 22:30:00	48503	0	1.044	280.2	309.6	-30.42	-0.884
2015-01-17 23:00:00	48504	0.001	1.016	285.1	309.6	-25.45	-0.977
2015-01-17 23:30:00	48505	0.002	1.131	282.4	309.3	-28.03	-1.087
2015-01-18	48506	0.001	0.955	281.6	309.3	-28.68	-1.101
2015-01-18 00:30:00	48507	0	0.791	281.4	308.4	-27.84	-1.405
2015-01-18 01:00:00	48508	0.001	0.826	283.3	308.2	-25.77	-1.563
2015-01-18 01:30:00	48509	0.001	0.744	283.7	307.8	-24.93	-1.7
2015-01-18 02:00:00	48510	0.005	0.717	288.3	308.1	-20.49	-1.769
2015-01-18 02:30:00	48511	0.025	0.621	293.6	309.1	-16.14	-1.583
2015-01-18 03:00:00	48512	0.029	0.49	297.4	309.9	-12.97	-1.428
2015-01-18 03:30:00	48513	0.041	0.517	299.8	310.6	-11.21	-1.3
2015-01-18 04:00:00	48514	0.002	0.696	293.4	309.9	-17.22	-1.292
2015-01-18 04:30:00	48515	0.001	0.912	288.5	309.1	-21.47	-1.436
2015-01-18 05:00:00	48516	0.007	0.847	290.8	309.3	-19.31	-1.429
2015-01-18 05:30:00	48517	0.004	0.791	287.7	309	-22.02	-1.428
2015-01-18 06:00:00	48518	0.002	1.035	284.7	308	-24.37	-1.587
2015-01-18 06:30:00	48519	0.01	1.347	282.7	307.5	-26.1	-1.653
2015-01-18 07:00:00	48520	0.013	1.493	281	307.6	-28.1	-1.592
2015-01-18 07:30:00	48521	0.07	1.784	277.2	307.5	-32	-1.437
2015-01-18 08:00:00	48522	3.871	1.92	275.2	307.8	-30.65	-1.052
2015-01-18 08:30:00	48523	19.25	4.127	275.8	309.3	-18.29	-1.03
2015-01-18 09:00:00	48524	32.59	5.545	277.2	312.2	-7.994	-0.181
2015-01-18 09:30:00	48525	64.97	9.15	275.8	316.5	15.11	0.512
2015-01-18 10:00:00	48526	125.4	16.29	266.4	320.1	55.46	1.031
2015-01-18 10:30:00	48527	198.3	23.3	251.2	323.9	102.3	2.303
2015-01-18 11:00:00	48528	348.9	37.04	248.2	333.7	226.3	4.534
2015-01-18 11:30:00	48529	415	41.26	247.2	340.2	280.8	5.824
2015-01-18 12:00:00	48530	440.6	44.45	251.5	344.2	303.4	6.16
2015-01-18 12:30:00	48531	447.1	45.12	260.2	347.9	314.2	6.563
2015-01-18 13:00:00	48532	452.1	46.89	275.5	349.1	331.6	6.184
2015-01-18 13:30:00	48533	514.3	49	246.4	346.5	365.2	5.618
2015-01-18 14:00:00	48534	473.4	42.35	243.9	345.7	329.2	6.031
2015-01-18 14:30:00	48535	388.9	32.36	241.9	341.5	256.9	5.91
2015-01-18 15:00:00	48536	334	26.39	240.3	336.9	210.9	5.467
2015-01-18 15:30:00	48537	267.7	20.1	239	333.6	152.9	5.303
2015-01-18 16:00:00	48538	184.9	14.28	239.3	330.5	79.46	4.884
2015-01-18 16:30:00	48539	75.01	7.833	241.8	328	-19.03	4.04
2015-01-18 17:00:00	48540	37.11	5.539	246.8	327.1	-48.69	3.666
2015-01-18 17:30:00	48541	7.567	2.562	242.4	324.8	-77.31	3.275
2015-01-18 18:00:00	48542	0.001	1.249	238.5	324.3	-87	3.031
2015-01-18 18:30:00	48543	0	1.309	236.3	322.4	-87.4	2.592
2015-01-18 19:00:00	48544	0	1.316	233.5	321.2	-89	2.321
2015-01-18 19:30:00	48545	0	1.28	231.8	320.1	-89.6	2.168
2015-01-18 20:00:00	48546	0	1.601	232.5	318.4	-87.5	1.928
2015-01-18 20:30:00	48547	0	1.9	237	317.3	-82.3	1.708
2015-01-18 21:00:00	48548	0	2.557	232	315	-85.5	1.265
2015-01-18 21:30:00	48549	0	2.144	231.5	316.3	-86.9	1.525
2015-01-18 22:00:00	48550	0	2.35	231.3	316	-87	1.428
2015-01-18 22:30:00	48551	0	2.439	230.9	316	-87.6	1.441
2015-01-18 23:00:00	48552	0	2.314	230.8	316.8	-88.3	1.596
2015-01-18 23:30:00	48553	0	2.263	230.9	316.7	-88.1	1.671
2015-01-19	48554	0	2.035	230.7	316.4	-87.7	1.752
2015-01-19 00:30:00	48555	0	2.029	230.8	316.7	-88	1.851
2015-01-19 01:00:00	48556	0	1.983	230.5	316.8	-88.3	1.907
2015-01-19 01:30:00	48557	0	1.96	230.7	316.6	-87.9	1.945
2015-01-19 02:00:00	48558	0	2.042	230.2	315.8	-87.6	1.827
2015-01-19 02:30:00	48559	0	2.549	229.7	311.8	-84.6	1.323
2015-01-19 03:00:00	48560	0	2.702	228.8	308.3	-82.1	0.813
2015-01-19 03:30:00	48561	0	2.765	228.1	306.8	-81.5	0.455
2015-01-19 04:00:00	48562	0	2.952	227.2	304	-79.7	0.165
2015-01-19 04:30:00	48563	0	2.657	225.9	302.4	-79.18	0.001
2015-01-19 05:00:00	48564	0	2.744	225.4	302.2	-79.48	-0.071
2015-01-19 05:30:00	48565	0	3.409	225	300.9	-79.31	-0.75
2015-01-19 06:00:00	48566	0	2.299	223.9	300.7	-79.15	-0.359
2015-01-19 06:30:00	48567	0	2.053	223.8	300.5	-78.7	-0.475
2015-01-19 07:00:00	48568	0	1.791	222.7	299	-78.08	-1.259
2015-01-19 07:30:00	48569	0.005	1.807	220.1	297	-78.65	-2.402
2015-01-19 08:00:00	48570	10.93	4.133	219.5	295.7	-69.36	-2.927
2015-01-19 08:30:00	48571	52.34	9.47	220.5	296.7	-33.33	-2.058
2015-01-19 09:00:00	48572	130	16.16	222.8	301.6	35.08	0.35
2015-01-19 09:30:00	48573	211.2	21.78	224.9	308	106.3	1.895
2015-01-19 10:00:00	48574	288.2	26.88	227	314	174.3	2.736
2015-01-19 10:30:00	48575	340.1	30.56	230.1	321.6	218.1	4.235
2015-01-19 11:00:00	48576	387.2	35.55	233	328.7	256	4.606
2015-01-19 11:30:00	48577	443.7	37.37	236.2	335.2	307.4	6.239
2015-01-19 12:00:00	48578	466.4	37.24	240.4	341.5	328.1	7.519
2015-01-19 12:30:00	48579	486	42.84	242.6	344.8	341	6.432
2015-01-19 13:00:00	48580	488.8	43.36	243.2	347.4	341.2	6.579
2015-01-19 13:30:00	48581	475.8	40.81	244.3	348.1	331.2	6.98
2015-01-19 14:00:00	48582	448.8	37.39	244.5	347.4	308.5	7.165
2015-01-19 14:30:00	48583	394.5	30.57	245.2	344.8	264.4	7.289
2015-01-19 15:00:00	48584	339.9	24.2	245.2	341	220	7.14
2015-01-19 15:30:00	48585	264	17.07	245.7	338.2	154.4	7.46
2015-01-19 16:00:00	48586	181.5	11.96	245.6	334.2	80.9	6.809
2015-01-19 16:30:00	48587	105.8	8.54	245.7	331.1	11.84	6.255
2015-01-19 17:00:00	48588	38.56	5.309	245.4	327.8	-49.1	5.21
2015-01-19 17:30:00	48589	6.043	3.303	244.2	324.1	-77.17	4.261
2015-01-19 18:00:00	48590	0	3.125	243.6	320.7	-80.2	3.745
2015-01-19 18:30:00	48591	0	2.619	243.6	319.9	-78.88	3.702
2015-01-19 19:00:00	48592	0	2.145	243.2	319.1	-78.1	3.545
2015-01-19 19:30:00	48593	0	2.037	242.5	318.9	-78.45	3.239
2015-01-19 20:00:00	48594	0	1.85	241.3	318.8	-79.38	2.824
2015-01-19 20:30:00	48595	0	1.741	240.3	317.4	-78.82	2.224
2015-01-19 21:00:00	48596	0	1.781	238.9	314.6	-77.46	1.608
2015-01-19 21:30:00	48597	0	2	237.3	311.4	-76.1	0.87
2015-01-19 22:00:00	48598	0	2.25	236.6	309.3	-74.93	0.427
2015-01-19 22:30:00	48599	0	1.946	236.1	307.7	-73.51	0.17
2015-01-19 23:00:00	48600	0	1.934	235.5	306.9	-73.36	-0.118
2015-01-19 23:30:00	48601	0	2.17	235.1	305.3	-72.41	-0.442
2015-01-20	48602	0	1.706	234.1	304.3	-71.97	-0.792
2015-01-20 00:30:00	48603	0	1.303	232.8	303.9	-72.36	-1.208
2015-01-20 01:00:00	48604	0	1.218	231.7	302.7	-72.17	-1.75
2015-01-20 01:30:00	48605	0	1.395	231.7	302.1	-71.86	-1.994
2015-01-20 02:00:00	48606	0	1.679	231.9	301	-70.73	-2.162
2015-01-20 02:30:00	48607	0	1.6	232.3	301.1	-70.34	-2.124
2015-01-20 03:00:00	48608	0	2.274	232.5	299.1	-68.86	-2.413
2015-01-20 03:30:00	48609	0	2.468	232.2	299.1	-69.41	-2.671
2015-01-20 04:00:00	48610	0	2.754	231.8	298.4	-69.3	-2.93
2015-01-20 04:30:00	48611	0	3.119	231.6	297.2	-68.77	-3.216
2015-01-20 05:00:00	48612	0	3.176	231	296.2	-68.43	-3.59
2015-01-20 05:30:00	48613	0	3.146	230.7	296.2	-68.58	-3.641
2015-01-20 06:00:00	48614	0	3.313	230.8	295.4	-67.87	-3.866
2015-01-20 06:30:00	48615	0	3.457	230.9	294.9	-67.53	-3.967
2015-01-20 07:00:00	48616	0	3.436	231.3	295.2	-67.33	-3.824
2015-01-20 07:30:00	48617	0.03	3.357	231.5	295.9	-67.75	-3.694
2015-01-20 08:00:00	48618	7.477	4.196	232	295.9	-60.69	-3.538
2015-01-20 08:30:00	48619	39.68	8	232.3	298.1	-34.09	-3.05
2015-01-20 09:00:00	48620	94.8	13.47	233	302.9	11.39	-1.496
2015-01-20 09:30:00	48621	144.6	16.93	236	307.4	56.22	-0.03
2015-01-20 10:00:00	48622	235.1	25.93	243.2	313.5	138.9	1.074
2015-01-20 10:30:00	48623	287.9	30.87	244.8	319.7	182.1	2.313
2015-01-20 11:00:00	48624	258.2	27.02	246.8	322.7	155.3	2.656
2015-01-20 11:30:00	48625	381.3	38.82	250.9	328.6	264.8	3.165
2015-01-20 12:00:00	48626	330.9	33.06	252.5	329.9	220.4	3.19
2015-01-20 12:30:00	48627	344.6	33.96	252	331.8	230.7	3.496
2015-01-20 13:00:00	48628	421.4	41.15	249.9	336.1	293.9	4.135
2015-01-20 13:30:00	48629	350.6	33.46	249.3	335.2	231.2	4.062
2015-01-20 14:00:00	48630	374.4	34.29	248.8	337	251.9	4.563
2015-01-20 14:30:00	48631	360.4	29.78	250	338.6	242	5.813
2015-01-20 15:00:00	48632	299.6	22.86	248.7	336.1	189.4	5.81
2015-01-20 15:30:00	48633	237.2	18.23	248	332.7	134.3	5.276
2015-01-20 16:00:00	48634	166.4	13.59	251.8	330.2	74.37	4.872
2015-01-20 16:30:00	48635	101.1	9.43	253.5	328.5	16.66	4.782
2015-01-20 17:00:00	48636	32.89	4.365	248.3	323.1	-46.25	3.775
2015-01-20 17:30:00	48637	2.356	2.708	256.7	320.1	-63.8	2.523
2015-01-20 18:00:00	48638	0.086	2.054	285.9	322.6	-38.69	2.634
2015-01-20 18:30:00	48639	0.001	1.694	281.2	322.8	-43.28	2.867
2015-01-20 19:00:00	48640	0	1.761	270	321.7	-53.43	2.798
2015-01-20 19:30:00	48641	0	1.983	254	319.4	-67.34	2.637
2015-01-20 20:00:00	48642	0	2.336	257.3	316.9	-61.98	2.057
2015-01-20 20:30:00	48643	0	2.833	257.1	316.1	-61.75	1.967
2015-01-20 21:00:00	48644	0	2.526	254.3	315.8	-64.12	2.231
2015-01-20 21:30:00	48645	0	2.847	249	315.4	-69.32	2.076
2015-01-20 22:00:00	48646	0.002	3.497	244.9	313.3	-71.89	1.475
2015-01-20 22:30:00	48647	0.004	3.496	243.5	312.6	-72.63	1.6
2015-01-20 23:00:00	48648	0.008	2.982	243.7	316.9	-76.12	2.326
2015-01-20 23:30:00	48649	0	2.703	241.9	318.3	-79.15	2.551
2015-01-21	48650	0	2.515	247.5	319.7	-74.65	2.603
2015-01-21 00:30:00	48651	0	2.317	245.1	319.7	-76.94	2.452
2015-01-21 01:00:00	48652	0	2.279	243	318.5	-77.72	2.173
2015-01-21 01:30:00	48653	0	2.296	238.8	317.4	-80.9	1.919
2015-01-21 02:00:00	48654	0	2.464	239.8	316.5	-79.11	1.602
2015-01-21 02:30:00	48655	0	2.514	238	315.4	-79.88	1.447
2015-01-21 03:00:00	48656	0	2.573	236.2	313.6	-79.98	1.046
2015-01-21 03:30:00	48657	0	2.526	238	313.2	-77.76	0.789
2015-01-21 04:00:00	48658	0	2.404	238.6	312.6	-76.37	0.634
2015-01-21 04:30:00	48659	0	2.417	232.7	312	-81.8	0.479
2015-01-21 05:00:00	48660	0	2.396	230.3	311.4	-83.5	0.331
2015-01-21 05:30:00	48661	0	2.377	228.9	310.4	-83.8	0.075
2015-01-21 06:00:00	48662	0	2.559	227.8	309.1	-83.8	-0.285
2015-01-21 06:30:00	48663	0	2.448	227.1	308.1	-83.5	-0.523
2015-01-21 07:00:00	48664	0	2.459	226.4	307.8	-83.9	-0.706
2015-01-21 07:30:00	48665	0.012	2.619	225.2	306.9	-84.3	-0.91
2015-01-21 08:00:00	48666	10.1	4.456	224	306.1	-76.43	-0.965
2015-01-21 08:30:00	48667	60.76	10.96	223	307	-34.21	0.361
2015-01-21 09:00:00	48668	151.1	19.46	223	309.9	44.75	1.882
2015-01-21 09:30:00	48669	237	25.01	224.2	314.8	121.4	3.104
2015-01-21 10:00:00	48670	319.6	30.67	225.9	320.2	194.6	4.069
2015-01-21 10:30:00	48671	392.4	37.3	226.3	325	256.4	4.218
2015-01-21 11:00:00	48672	416.7	42.53	227.5	330.3	271.4	4.267
2015-01-21 11:30:00	48673	501.1	44.12	229.6	336.2	350.3	5.415
2015-01-21 12:00:00	48674	536	48.1	230.5	339.2	379.2	5.049
2015-01-21 12:30:00	48675	554.2	50.92	231.3	341.5	393	4.637
2015-01-21 13:00:00	48676	553.1	49.75	232.3	344.5	391.1	5.419
2015-01-21 13:30:00	48677	537.7	46.78	233.4	346.4	377.9	5.822
2015-01-21 14:00:00	48678	506.7	42.01	234	346	352.7	6.501
2015-01-21 14:30:00	48679	460.6	35.24	233.9	343.5	315.7	6.567
2015-01-21 15:00:00	48680	396.7	25.74	234.1	340.8	264.3	7.397
2015-01-21 15:30:00	48681	324.9	18	234.5	337	204.4	7.826
2015-01-21 16:00:00	48682	244.2	10.28	234.7	332.3	136.4	7.897
2015-01-21 16:30:00	48683	155.4	7.755	233.8	328.1	53.27	6.939
2015-01-21 17:00:00	48684	56.22	4.336	233.4	326.2	-40.91	5.902
2015-01-21 17:30:00	48685	6.194	3.181	233.6	322.7	-86.1	3.631
2015-01-21 18:00:00	48686	0	3.151	232.2	320.8	-91.8	2.898
2015-01-21 18:30:00	48687	0	3.03	231.1	319.4	-91.4	2.709
2015-01-21 19:00:00	48688	0	2.67	230.9	319.5	-91.2	2.779
2015-01-21 19:30:00	48689	0	2.833	231.2	318	-89.6	2.587
2015-01-21 20:00:00	48690	0	2.437	231.4	316.7	-87.7	2.564
2015-01-21 20:30:00	48691	0	2.505	231.4	312.6	-83.7	2.216
2015-01-21 21:00:00	48692	0	2.131	231.1	310.9	-81.9	2.392
2015-01-21 21:30:00	48693	0	2.385	230.8	309.3	-81	2.165
2015-01-21 22:00:00	48694	0	2.907	230.8	308	-80.1	1.697
2015-01-21 22:30:00	48695	0	2.769	230.7	307.8	-79.84	1.77
2015-01-21 23:00:00	48696	0	2.865	230.1	306.5	-79.23	1.535
2015-01-21 23:30:00	48697	0	3.368	230.1	305.8	-79.13	1.047
2015-01-22	48698	0	3.537	229.7	304.7	-78.54	0.672
2015-01-22 00:30:00	48699	0	3.425	229.8	303.9	-77.56	0.67
2015-01-22 01:00:00	48700	0	3.415	229.7	303.6	-77.34	0.311
2015-01-22 01:30:00	48701	0	2.285	228	302.7	-76.94	-0.138
2015-01-22 02:00:00	48702	0	2.312	226.6	301.4	-77.04	-0.507
2015-01-22 02:30:00	48703	0	1.994	224.6	300.9	-78.33	-0.743
2015-01-22 03:00:00	48704	0	2.134	223.4	299.6	-78.28	-1.178
2015-01-22 03:30:00	48705	0	2.293	221.8	298.2	-78.7	-1.875
2015-01-22 04:00:00	48706	0	2.587	221.2	296.3	-77.67	-2.444
2015-01-22 04:30:00	48707	0	2.673	220.2	296.1	-78.51	-2.826
2015-01-22 05:00:00	48708	0	2.526	219.2	294.6	-77.95	-2.997
2015-01-22 05:30:00	48709	0	2.262	219	294	-77.29	-3.076
2015-01-22 06:00:00	48710	0	2.404	218.5	293	-76.88	-3.518
2015-01-22 06:30:00	48711	0	2.494	218.1	292.8	-77.11	-3.898
2015-01-22 07:00:00	48712	0	2.626	217.2	291.9	-77.27	-4.174
2015-01-22 07:30:00	48713	0.115	3.185	216.4	289.8	-76.49	-4.614
2015-01-22 08:00:00	48714	11.64	4.949	215.6	290.3	-68.05	-4.601
2015-01-22 08:30:00	48715	56.38	10.1	215.2	291.6	-30.14	-3.217
2015-01-22 09:00:00	48716	135.6	17.95	215.8	295.3	38.1	-1.691
2015-01-22 09:30:00	48717	206.9	22.1	219	302.1	101.7	0.576
2015-01-22 10:00:00	48718	278.3	27.78	221.8	308.4	163.9	1.874
2015-01-22 10:30:00	48719	349.4	33.92	224.9	315	225.4	2.583
2015-01-22 11:00:00	48720	379.2	39.88	227.3	321.4	245.2	2.764
2015-01-22 11:30:00	48721	448.2	42.27	229.4	326	309.4	3.225
2015-01-22 12:00:00	48722	479.5	42.33	233	332.9	337.2	4.681
2015-01-22 12:30:00	48723	474.2	43.4	235.2	336.6	329.5	4.634
2015-01-22 13:00:00	48724	459.6	43.91	238	339.2	314.4	4.838
2015-01-22 13:30:00	48725	465.4	41.8	234.4	343	314.9	5.631
2015-01-22 14:00:00	48726	410.9	37.34	237.5	342.7	268.3	5.906
2015-01-22 14:30:00	48727	348.7	29.98	238.1	341.7	215.1	6.478
2015-01-22 15:00:00	48728	298.7	23.91	238.1	339.3	173.6	6.722
2015-01-22 15:30:00	48729	258.3	17.9	236.9	336.8	140.5	7.078
2015-01-22 16:00:00	48730	183.2	11.5	236.8	332.6	75.9	6.657
2015-01-22 16:30:00	48731	104	8.4	237.5	329.4	3.682	5.701
2015-01-22 17:00:00	48732	27.45	4.246	239	325.8	-63.56	4.34
2015-01-22 17:30:00	48733	3.657	2.833	241	321.6	-79.71	3.394
2015-01-22 18:00:00	48734	0.004	2.613	244.6	320.2	-78.23	3.011
2015-01-22 18:30:00	48735	0	2.74	240.8	319.4	-81.3	2.774
2015-01-22 19:00:00	48736	0	2.717	240.9	319.8	-81.6	2.664
2015-01-22 19:30:00	48737	0	2.813	241.3	318.2	-79.67	2.42
2015-01-22 20:00:00	48738	0	2.815	240.2	317.5	-80.1	2.319
2015-01-22 20:30:00	48739	0	3.055	239.5	315.1	-78.66	1.935
2015-01-22 21:00:00	48740	0	2.94	238.9	313.1	-77.21	1.694
2015-01-22 21:30:00	48741	0.001	2.97	239	311.7	-75.66	1.334
2015-01-22 22:00:00	48742	0	2.721	238	310.4	-75.12	0.893
2015-01-22 22:30:00	48743	0	2.604	235.8	307.6	-74.38	-0.16
2015-01-22 23:00:00	48744	0	3.024	235.1	305.3	-73.26	-1.003
2015-01-22 23:30:00	48745	0.001	3.392	234.6	304.4	-73.16	-1.3
2015-01-23	48746	0	2.986	233.1	304.7	-74.63	-1.364
2015-01-23 00:30:00	48747	0	2.717	231.7	303.2	-74.24	-1.72
2015-01-23 01:00:00	48748	0	2.96	230.7	301.6	-73.81	-2.141
2015-01-23 01:30:00	48749	0	3.127	230.1	301.1	-74.08	-2.219
2015-01-23 02:00:00	48750	0	3.16	229.9	300.4	-73.62	-2.434
2015-01-23 02:30:00	48751	0.002	2.724	229.7	300.8	-73.85	-2.201
2015-01-23 03:00:00	48752	0	2.525	229.2	300.3	-73.6	-2.218
2015-01-23 03:30:00	48753	0	2.79	228.5	299.5	-73.78	-2.389
2015-01-23 04:00:00	48754	0	2.866	228.1	298.2	-72.98	-2.67
2015-01-23 04:30:00	48755	0.001	3.364	227.2	297.4	-73.52	-2.93
2015-01-23 05:00:00	48756	0	2.872	226.2	297.3	-74.02	-2.85
2015-01-23 05:30:00	48757	0	2.59	226.3	297.3	-73.61	-2.882
2015-01-23 06:00:00	48758	0	2.551	229	296	-69.51	-3.099
2015-01-23 06:30:00	48759	0	2.711	228.9	295.6	-69.43	-3.073
2015-01-23 07:00:00	48760	0	2.621	228.2	295.6	-69.99	-2.934
2015-01-23 07:30:00	48761	0.908	3.195	229	295.1	-68.46	-3.468
2015-01-23 08:00:00	48762	15.75	5.282	229.3	296.1	-56.32	-3.088
2015-01-23 08:30:00	48763	70.85	11.75	232.4	300.9	-9.47	-2.033
2015-01-23 09:00:00	48764	120.1	16.62	235	306.2	32.33	-0.852
2015-01-23 09:30:00	48765	188.1	22.68	239.5	312.6	92.3	0.691
2015-01-23 10:00:00	48766	246.6	28.46	247	318.4	146.7	1.485
2015-01-23 10:30:00	48767	261.1	29.49	252.2	322.4	161.4	1.722
2015-01-23 11:00:00	48768	244.7	27.77	253.1	325.2	144.8	2.078
2015-01-23 11:30:00	48769	260.2	28.22	250.7	327.4	155.2	2.585
2015-01-23 12:00:00	48770	254.7	25.89	247.6	329	147.4	3.152
2015-01-23 12:30:00	48771	247.5	24.63	247.8	331.3	139.4	3.899
2015-01-23 13:00:00	48772	292.9	29.64	254.1	336.3	181.1	4.791
2015-01-23 13:30:00	48773	245.3	24.58	260.5	338.4	142.9	5.425
2015-01-23 14:00:00	48774	262.5	25.8	264.7	342.7	158.7	6.718
2015-01-23 14:30:00	48775	305.1	26.19	252	344.7	186.3	7.998
2015-01-23 15:00:00	48776	339.8	26.03	261.1	350.4	224.4	10.17
2015-01-23 15:30:00	48777	237.3	16.26	253.1	346.1	128	10.06
2015-01-23 16:00:00	48778	164.2	10.7	251.8	340.6	64.8	9.08
2015-01-23 16:30:00	48779	93.8	6.825	252	336	2.948	8.28
2015-01-23 17:00:00	48780	38.19	4.553	251.2	331	-46.08	6.518
2015-01-23 17:30:00	48781	6.786	3.24	250.6	326.1	-71.99	4.759
2015-01-23 18:00:00	48782	0	2.923	248.9	322.9	-76.98	4.156
2015-01-23 18:30:00	48783	0	1.836	246	321.2	-77.05	3.465
2015-01-23 19:00:00	48784	0	2.499	244.8	318	-75.72	2.763
2015-01-23 19:30:00	48785	0	2.532	244.1	316.3	-74.67	2.464
2015-01-23 20:00:00	48786	0	3.1	242.7	314.6	-74.98	1.974
2015-01-23 20:30:00	48787	0	3.052	242.2	313.8	-74.64	1.917
2015-01-23 21:00:00	48788	0	3.541	242.5	313.1	-74.14	1.655
2015-01-23 21:30:00	48789	0.001	2.904	241.4	313.5	-75.02	2.313
2015-01-23 22:00:00	48790	0	3.104	239.6	311.5	-74.99	1.54
2015-01-23 22:30:00	48791	0.001	3.789	239.7	310.9	-74.94	1.418
2015-01-23 23:00:00	48792	0.09	3.186	240.3	312.1	-74.91	1.688
2015-01-23 23:30:00	48793	0	2.444	238.2	309.7	-73.96	1.15
2015-01-24	48794	0.003	2.773	239	309.4	-73.14	1.064
2015-01-24 00:30:00	48795	0.002	2.391	244.4	310.4	-68.36	1.386
2015-01-24 01:00:00	48796	0	1.837	248.3	311.3	-64.89	1.387
2015-01-24 01:30:00	48797	0	1.573	255.6	313	-59.01	1.45
2015-01-24 02:00:00	48798	0	1.506	245.7	313	-68.73	1.474
2015-01-24 02:30:00	48799	0	1.459	252.6	313.4	-62.31	1.468
2015-01-24 03:00:00	48800	0	1.219	264.6	314.8	-51.37	1.531
2015-01-24 03:30:00	48801	0	1.446	253.6	313.9	-61.76	1.395
2015-01-24 04:00:00	48802	0	1.74	251.3	312.2	-62.7	1.132
2015-01-24 04:30:00	48803	0	1.64	250.4	312.9	-64.2	1.254
2015-01-24 05:00:00	48804	0	1.628	248.5	312.9	-66.03	1.274
2015-01-24 05:30:00	48805	0	1.652	250	312.1	-63.8	1.169
2015-01-24 06:00:00	48806	0	1.501	255.9	312.1	-57.69	1.116
2015-01-24 06:30:00	48807	0	1.27	258.3	312	-55.02	1.039
2015-01-24 07:00:00	48808	0	1.17	271.1	312.7	-42.77	1.082
2015-01-24 07:30:00	48809	0.063	1.352	273.2	313.3	-41.45	1.197
2015-01-24 08:00:00	48810	5.991	2.468	276	314.9	-35.35	1.273
2015-01-24 08:30:00	48811	25.97	4.559	277.1	318.4	-19.89	1.58
2015-01-24 09:00:00	48812	57.37	8.12	274	320.7	2.63	1.796
2015-01-24 09:30:00	48813	93.6	11.95	275.1	322.8	33.89	2.008
2015-01-24 10:00:00	48814	123.9	15.23	274.4	325	58.1	2.244
2015-01-24 10:30:00	48815	149.1	18.12	275.6	327.1	79.39	2.448
2015-01-24 11:00:00	48816	131.4	15.82	280.3	327.9	68	2.455
2015-01-24 11:30:00	48817	186.8	22.05	276.8	330.1	111.5	2.759
2015-01-24 12:00:00	48818	259.9	29.09	270.2	333.9	167.1	3.415
2015-01-24 12:30:00	48819	351.3	36.67	259.3	338.3	235.7	4.258
2015-01-24 13:00:00	48820	313.8	32.23	265.2	339.1	207.6	4.481
2015-01-24 13:30:00	48821	172.7	18.68	285.3	337.5	101.8	4.298
2015-01-24 14:00:00	48822	129.2	14.82	297	335.6	75.72	3.703
2015-01-24 14:30:00	48823	126.7	14.8	299.8	336.1	75.65	3.714
2015-01-24 15:00:00	48824	111.2	12.85	298.7	335.8	61.18	3.876
2015-01-24 15:30:00	48825	35.14	4.157	302.8	331.1	2.627	3.121
2015-01-24 16:00:00	48826	24	3.248	302.9	329.3	-5.658	2.846
2015-01-24 16:30:00	48827	14.12	2.331	302.7	328	-13.48	2.713
2015-01-24 17:00:00	48828	7.376	1.729	301.5	326.8	-19.67	2.599
2015-01-24 17:30:00	48829	1.176	0.873	303.3	326.6	-22.99	2.597
2015-01-24 18:00:00	48830	0.005	0.443	303.5	325.5	-22.46	2.371
2015-01-24 18:30:00	48831	0	0.235	302.9	323.2	-20.52	1.69
2015-01-24 19:00:00	48832	0.001	0.355	302.2	321.7	-19.88	1.23
2015-01-24 19:30:00	48833	0.003	0.435	301.7	320.9	-19.64	1.015
2015-01-24 20:00:00	48834	0	0.444	296	318.7	-23.14	0.529
2015-01-24 20:30:00	48835	0.001	0.25	302.1	317.3	-15.49	0.123
2015-01-24 21:00:00	48836	0.025	0.402	304.4	316.2	-12.22	-0.208
2015-01-24 21:30:00	48837	0.099	0.608	304.5	314.8	-10.86	-0.55
2015-01-24 22:00:00	48838	0.197	0.733	302.9	313.8	-11.38	-0.854
2015-01-24 22:30:00	48839	0.213	0.79	302.6	313.7	-11.68	-0.907
2015-01-24 23:00:00	48840	0.197	0.714	302.4	313.6	-11.64	-0.901
2015-01-24 23:30:00	48841	0.122	0.599	302.9	313.6	-11.21	-0.848
2015-01-25	48842	0.079	0.512	302.9	313.7	-11.17	-0.801
2015-01-25 00:30:00	48843	0.032	0.392	303.2	313.7	-10.81	-0.776
2015-01-25 01:00:00	48844	0.044	0.529	302.9	313.9	-11.5	-0.712
2015-01-25 01:30:00	48845	0.028	0.415	302.7	314	-11.69	-0.659
2015-01-25 02:00:00	48846	0.016	0.308	302	313.7	-12.05	-0.697
2015-01-25 02:30:00	48847	0.016	0.359	300.8	313.4	-13.01	-0.743
2015-01-25 03:00:00	48848	0.015	0.419	298.5	313.2	-15.06	-0.776
2015-01-25 03:30:00	48849	0.014	0.433	298.9	313.3	-14.74	-0.714
2015-01-25 04:00:00	48850	0.015	0.529	299	313.5	-15	-0.619
2015-01-25 04:30:00	48851	0.013	0.655	298.8	313.6	-15.49	-0.576
2015-01-25 05:00:00	48852	0.009	0.632	299.1	313.6	-15.14	-0.601
2015-01-25 05:30:00	48853	0.028	0.553	299.8	313.9	-14.7	-0.505
2015-01-25 06:00:00	48854	0.01	0.439	299.8	314.3	-14.92	-0.419
2015-01-25 06:30:00	48855	0.007	0.434	299.2	314.2	-15.36	-0.481
2015-01-25 07:00:00	48856	0.011	0.438	300	314.1	-14.51	-0.515
2015-01-25 07:30:00	48857	0.043	0.473	300	314.1	-14.53	-0.508
2015-01-25 08:00:00	48858	2.676	0.745	301	314.3	-11.32	-0.52
2015-01-25 08:30:00	48859	12.44	1.786	300.7	314.9	-3.576	-0.437
2015-01-25 09:00:00	48860	31.02	3.935	300.2	316.1	11.23	-0.292
2015-01-25 09:30:00	48861	55.72	6.681	299.8	318.1	30.76	0.022
2015-01-25 10:00:00	48862	87.2	10.25	298.9	320.4	55.45	0.397
2015-01-25 10:30:00	48863	146.2	16.75	290.9	324.1	96.2	1.154
2015-01-25 11:00:00	48864	252.6	27.35	265.7	328.1	162.9	2.258
2015-01-25 11:30:00	48865	289.8	29.83	270.5	334.4	196	4.074
2015-01-25 12:00:00	48866	193	20.62	271.1	332.4	111.2	3.255
2015-01-25 12:30:00	48867	278.4	31.22	281.9	335.9	193.2	3.227
2015-01-25 13:00:00	48868	368.4	38.08	261.4	340.4	251.4	4.351
2015-01-25 13:30:00	48869	386.5	36.74	252.3	341.3	260.7	4.942
2015-01-25 14:00:00	48870	359.8	33.37	252.1	342	236.5	5.578
2015-01-25 14:30:00	48871	325.2	28.6	253.2	342	207.7	6.011
2015-01-25 15:00:00	48872	272.5	23.07	253.4	340	162.8	5.849
2015-01-25 15:30:00	48873	214.4	19.56	252.9	336.4	111.4	5.054
2015-01-25 16:00:00	48874	154.9	14.06	252	333.2	59.67	4.643
2015-01-25 16:30:00	48875	87.6	9.07	251	329.3	0.303	3.778
2015-01-25 17:00:00	48876	34.76	5.303	250.5	325.1	-45.12	2.792
2015-01-25 17:30:00	48877	5.705	2.24	249.4	322.3	-69.39	2.04
2015-01-25 18:00:00	48878	0.009	1.832	248.2	320.1	-73.7	1.628
2015-01-25 18:30:00	48879	0	2.006	247.2	318.3	-73.05	1.277
2015-01-25 19:00:00	48880	0	1.596	245.6	316.1	-72.08	0.821
2015-01-25 19:30:00	48881	0	1.762	244.6	314.3	-71.43	0.323
2015-01-25 20:00:00	48882	0	2.065	243.8	312.4	-70.71	-0.042
2015-01-25 20:30:00	48883	0	2.235	243.7	312	-70.52	-0.238
2015-01-25 21:00:00	48884	0	2.332	243.5	310.7	-69.47	-0.535
2015-01-25 21:30:00	48885	0	2.38	242.9	310.1	-69.58	-0.67
2015-01-25 22:00:00	48886	0	2.451	242.5	308.6	-68.56	-0.782
2015-01-25 22:30:00	48887	0	2.143	244.7	308.7	-66.2	-0.71
2015-01-25 23:00:00	48888	0.002	2.337	243.3	307.3	-66.34	-1.025
2015-01-25 23:30:00	48889	0	2.812	241.9	306.9	-67.79	-1.152
2015-01-26	48890	0	2.255	241.7	306.9	-67.42	-0.988
2015-01-26 00:30:00	48891	0	2.229	241.7	305.8	-66.27	-1.054
2015-01-26 01:00:00	48892	0	2.397	242.1	305.4	-65.77	-1.167
2015-01-26 01:30:00	48893	0	2.892	241.4	304.3	-65.73	-1.753
2015-01-26 02:00:00	48894	0	2.955	240.6	303.6	-65.88	-1.787
2015-01-26 02:30:00	48895	0	2.681	240.1	303.5	-66.01	-1.852
2015-01-26 03:00:00	48896	0	2.455	240.3	303.5	-65.68	-1.928
2015-01-26 03:30:00	48897	0	2.525	239.8	302.6	-65.26	-2.177
2015-01-26 04:00:00	48898	0	2.486	239.5	302.5	-65.43	-2.232
2015-01-26 04:30:00	48899	0	2.023	239	302.7	-65.73	-2.274
2015-01-26 05:00:00	48900	0	2.014	238.5	301.4	-64.93	-2.747
2015-01-26 05:30:00	48901	0	2.26	239.6	300.7	-63.33	-3.031
2015-01-26 06:00:00	48902	0	2.061	249.3	300.4	-53.19	-3.275
2015-01-26 06:30:00	48903	0.003	1.975	253.4	301.9	-50.42	-2.836
2015-01-26 07:00:00	48904	0	1.851	253	301.5	-50.4	-2.829
2015-01-26 07:30:00	48905	0.404	2.507	248.9	301.9	-55.12	-2.726
2015-01-26 08:00:00	48906	7.065	3.286	260.4	304.7	-40.57	-2.174
2015-01-26 08:30:00	48907	23.99	5.682	271.5	310.8	-21.03	-0.67
2015-01-26 09:00:00	48908	53.47	8.73	270.4	318.4	-3.257	1.785
2015-01-26 09:30:00	48909	73.29	9.65	280.3	325.7	18.28	3.455
2015-01-26 10:00:00	48910	85.8	10.46	283.3	328.7	29.97	3.905
2015-01-26 10:30:00	48911	135.3	16.39	283.4	331.7	70.56	4.09
2015-01-26 11:00:00	48912	210.4	24.4	282.8	336.1	132.7	4.678
2015-01-26 11:30:00	48913	201.9	22.22	284.3	337.4	126.6	4.855
2015-01-26 12:00:00	48914	150.4	17.35	284.8	334.6	83.3	4.14
2015-01-26 12:30:00	48915	157.1	18.46	283.1	333.5	88.1	3.676
2015-01-26 13:00:00	48916	141.1	16.58	282.4	332.7	74.21	3.382
2015-01-26 13:30:00	48917	145.1	17.01	281.5	332.4	77.23	3.273
2015-01-26 14:00:00	48918	154.7	18.19	281	332.7	84.8	3.248
2015-01-26 14:30:00	48919	128.7	14.85	283.4	331.1	66.07	2.933
2015-01-26 15:00:00	48920	100.5	11.97	282.1	329.1	41.54	2.518
2015-01-26 15:30:00	48921	70.33	8.77	279	326.7	13.85	2.178
2015-01-26 16:00:00	48922	49.17	6.551	276.1	324.9	-6.143	1.941
2015-01-26 16:30:00	48923	30.3	4.65	271.4	322.3	-25.26	1.546
2015-01-26 17:00:00	48924	19.47	3.664	267.8	319.7	-36.05	1.016
2015-01-26 17:30:00	48925	5.725	2.116	262	316.9	-51.26	0.519
2015-01-26 18:00:00	48926	0.008	1.249	253.5	313.7	-61.46	-0.156
2015-01-26 18:30:00	48927	0	1.503	243.3	310.8	-68.98	-0.769
2015-01-26 19:00:00	48928	0	1.494	246.8	309.4	-64.12	-1.132
2015-01-26 19:30:00	48929	0	1.718	239.5	307.1	-69.33	-1.536
2015-01-26 20:00:00	48930	0	1.891	232.2	304.7	-74.34	-1.968
2015-01-26 20:30:00	48931	0	1.897	230.9	303.7	-74.76	-2.306
2015-01-26 21:00:00	48932	0	2.04	218	301.2	-85.2	-2.719
2015-01-26 21:30:00	48933	0	1.984	212.7	300.4	-89.7	-2.946
2015-01-26 22:00:00	48934	0	2.087	204.3	298.3	-96	-3.375
2015-01-26 22:30:00	48935	0	2.303	202.5	296.1	-95.8	-3.882
2015-01-26 23:00:00	48936	0	2.339	202.1	295.1	-95.3	-4.229
2015-01-26 23:30:00	48937	0	2.773	195.7	292.7	-99.9	-4.67
2015-01-27	48938	0	2.641	194.3	292.3	-100.7	-4.815
2015-01-27 00:30:00	48939	0	2.581	193.5	291.3	-100.4	-5.073
2015-01-27 01:00:00	48940	0	2.577	193.2	289.7	-99.1	-5.467
2015-01-27 01:30:00	48941	0	2.866	192.3	287.4	-98	-5.922
2015-01-27 02:00:00	48942	0	2.899	191.1	287.5	-99.3	-6.089
2015-01-27 02:30:00	48943	0	2.145	189.9	287.4	-99.7	-6.017
2015-01-27 03:00:00	48944	0	2.153	190	286.4	-98.5	-6.231
2015-01-27 03:30:00	48945	0	2.408	189.7	285.2	-98	-6.563
2015-01-27 04:00:00	48946	0	2.722	189.6	283.9	-96.9	-6.884
2015-01-27 04:30:00	48947	0	2.699	189.3	283.3	-96.6	-7.023
2015-01-27 05:00:00	48948	0	2.756	189	282.9	-96.6	-7.136
2015-01-27 05:30:00	48949	0	2.534	189	282.8	-96.3	-7.108
2015-01-27 06:00:00	48950	0	2.436	189.1	282.3	-95.7	-7.162
2015-01-27 06:30:00	48951	0	2.552	189	281.8	-95.3	-7.261
2015-01-27 07:00:00	48952	0	2.761	189.2	281.9	-95.5	-7.328
2015-01-27 07:30:00	48953	0.217	2.681	189.1	281.1	-94.4	-7.372
2015-01-27 08:00:00	48954	21.02	6.278	188.7	280.8	-77.39	-7.129
2015-01-27 08:30:00	48955	86.1	13.31	188	281.1	-20.3	-5.679
2015-01-27 09:00:00	48956	168.7	20.28	188.4	284.5	52.23	-4.426
2015-01-27 09:30:00	48957	263.4	28.4	190.1	289.4	135.6	-3.82
2015-01-27 10:00:00	48958	347.4	34.09	192.3	295.3	210.3	-2.942
2015-01-27 10:30:00	48959	433.7	41.17	194.6	302.2	284.9	-1.784
2015-01-27 11:00:00	48960	450.8	47.78	196.9	308.3	291.6	-1.596
2015-01-27 11:30:00	48961	549.4	51.21	198.8	313.3	383.7	-0.974
2015-01-27 12:00:00	48962	584.1	52.97	200.3	318.1	413.3	-0.392
2015-01-27 12:30:00	48963	598.2	53.6	203.2	323.1	424.7	0.377
2015-01-27 13:00:00	48964	595.6	53.8	205.6	326.4	421	0.779
2015-01-27 13:30:00	48965	581.6	51.63	206.8	328	408.7	1.255
2015-01-27 14:00:00	48966	547.6	46.85	207.8	327.8	380.7	1.809
2015-01-27 14:30:00	48967	498.1	39.83	208.8	326.6	340.5	2.425
2015-01-27 15:00:00	48968	434.9	31.92	209.3	323.8	288.5	2.719
2015-01-27 15:30:00	48969	356.9	24.61	207.8	320.1	219.9	2.792
2015-01-27 16:00:00	48970	284.4	15.89	208.3	315.8	160.9	2.799
2015-01-27 16:30:00	48971	178.7	9.2	207.9	312.2	65.17	2.628
2015-01-27 17:00:00	48972	81.3	5.717	207.8	309.4	-25.97	2.084
2015-01-27 17:30:00	48973	14.52	2.807	208	307.3	-87.6	0.282
2015-01-27 18:00:00	48974	0.045	1.902	207	302.1	-97	-1.256
2015-01-27 18:30:00	48975	0	2.269	206.5	299.1	-94.9	-1.865
2015-01-27 19:00:00	48976	0	2.816	206.5	296.4	-92.6	-2.368
2015-01-27 19:30:00	48977	0.002	4.214	206.9	295	-92.3	-3.124
2015-01-27 20:00:00	48978	0.001	4.291	206.8	294.9	-92.3	-3.04
2015-01-27 20:30:00	48979	0	3.708	207.1	294.3	-90.9	-2.818
2015-01-27 21:00:00	48980	0	3.423	207.4	295.4	-91.4	-2.725
2015-01-27 21:30:00	48981	0	3.657	208.5	293.4	-88.6	-3.034
2015-01-27 22:00:00	48982	0.006	3.654	208.6	292.7	-87.7	-3.282
2015-01-27 22:30:00	48983	0.002	3.363	213.4	293	-82.9	-2.847
2015-01-27 23:00:00	48984	0	2.515	219.4	293.5	-76.68	-2.457
2015-01-27 23:30:00	48985	0	2.224	221.3	293.8	-74.72	-2.437
2015-01-28	48986	0	2.112	220.4	293.6	-75.31	-2.438
2015-01-28 00:30:00	48987	0	1.918	224.5	293.7	-71.11	-2.447
2015-01-28 01:00:00	48988	0	2.175	234.2	294.7	-62.67	-2.821
2015-01-28 01:30:00	48989	0	1.787	234.2	296	-63.62	-2.841
2015-01-28 02:00:00	48990	0	1.13	235	296.6	-62.75	-3.085
2015-01-28 02:30:00	48991	0	0.964	247.8	296.9	-50.08	-3.487
2015-01-28 03:00:00	48992	0	0.676	250.8	296.6	-46.48	-3.961
2015-01-28 03:30:00	48993	0	0.696	253.2	295.4	-42.8	-4.456
2015-01-28 04:00:00	48994	0	0.857	250.1	294.3	-45.09	-4.741
2015-01-28 04:30:00	48995	0	1.142	241.6	292.7	-52.23	-4.982
2015-01-28 05:00:00	48996	0	1.39	235.4	291.4	-57.42	-5.157
2015-01-28 05:30:00	48997	0	1.33	240.2	291.5	-52.59	-5.189
2015-01-28 06:00:00	48998	0	1.422	248.3	291.6	-44.71	-5.29
2015-01-28 06:30:00	48999	0	0.992	248	292.4	-45.4	-5.161
2015-01-28 07:00:00	49000	0	1.155	248.1	291.9	-44.96	-5.289
2015-01-28 07:30:00	49001	0.132	1.059	248.8	291.8	-43.97	-5.389
2015-01-28 08:00:00	49002	11.09	2.478	240.2	292	-43.14	-5.323
2015-01-28 08:30:00	49003	45.78	6.687	224.4	291.8	-28.36	-5.231
2015-01-28 09:00:00	49004	136.1	17.36	214.5	293.8	39.55	-4.287
2015-01-28 09:30:00	49005	241.6	25.75	207	298.1	124.8	-2.418
2015-01-28 10:00:00	49006	300.7	29.63	209.6	302.4	178.4	-1.753
2015-01-28 10:30:00	49007	391.2	37.37	208	308.2	253.6	-0.862
2015-01-28 11:00:00	49008	427.4	43.76	207.6	314.5	276.7	-0.114
2015-01-28 11:30:00	49009	510.4	45.76	210.4	320	355.1	0.733
2015-01-28 12:00:00	49010	534.1	48.14	213.2	324.8	374.4	1.001
2015-01-28 12:30:00	49011	526.5	47.06	214.6	328.2	365.9	1.797
2015-01-28 13:00:00	49012	525.6	48.01	215.7	329.1	364.2	1.492
2015-01-28 13:30:00	49013	510.1	46.05	217.4	330.4	351	1.714
2015-01-28 14:00:00	49014	474.6	42.23	218	329.3	321.1	1.685
2015-01-28 14:30:00	49015	414.9	34.81	219.2	327.9	271.5	2.243
2015-01-28 15:00:00	49016	315.2	24.96	221.1	324.5	186.8	2.48
2015-01-28 15:30:00	49017	192.8	16.11	222.5	319.2	79.96	1.499
2015-01-28 16:00:00	49018	165.3	15.11	225.1	316.6	58.71	0.949
2015-01-28 16:30:00	49019	88.1	10.37	229.5	313.8	-6.54	0.004
2015-01-28 17:00:00	49020	40.03	6.37	236	310.9	-41.2	-0.724
2015-01-28 17:30:00	49021	9.73	2.817	244.3	308.9	-57.67	-1.053
2015-01-28 18:00:00	49022	0.032	1.582	251.9	308.2	-57.84	-1.189
2015-01-28 18:30:00	49023	0	1.709	256	307.8	-53.55	-1.272
2015-01-28 19:00:00	49024	0	1.73	253.9	307.3	-55.15	-1.291
2015-01-28 19:30:00	49025	0	1.595	253.8	307.1	-54.93	-1.317
2015-01-28 20:00:00	49026	0	1.942	242.5	305.4	-64.86	-1.544
2015-01-28 20:30:00	49027	0	1.936	251.8	305.4	-55.54	-1.586
2015-01-28 21:00:00	49028	0	1.82	252.8	305.3	-54.34	-1.638
2015-01-28 21:30:00	49029	0	1.588	264.2	306.3	-43.65	-1.603
2015-01-28 22:00:00	49030	0	1.197	270.8	307.2	-37.51	-1.52
2015-01-28 22:30:00	49031	0.001	1.106	273.8	307.4	-34.65	-1.525
2015-01-28 23:00:00	49032	0.002	1.086	277.2	307.8	-31.73	-1.502
2015-01-28 23:30:00	49033	0.004	1.08	277.9	308.5	-31.66	-1.349
2015-01-29	49034	0.002	0.96	279.8	308.8	-29.96	-1.345
2015-01-29 00:30:00	49035	0.001	0.871	280.9	308.5	-28.48	-1.378
2015-01-29 01:00:00	49036	0.006	0.667	284.5	308.7	-24.87	-1.398
2015-01-29 01:30:00	49037	0.001	0.558	283.6	308.2	-25.17	-1.584
2015-01-29 02:00:00	49038	0.003	0.465	284.9	308.1	-23.7	-1.741
2015-01-29 02:30:00	49039	0.009	0.535	288.1	308.2	-20.59	-1.838
2015-01-29 03:00:00	49040	0.002	0.453	288	308	-20.43	-1.841
2015-01-29 03:30:00	49041	0	0.31	286.3	306.5	-20.43	-2.319
2015-01-29 04:00:00	49042	0.001	0.422	282.9	305.2	-22.66	-2.678
2015-01-29 04:30:00	49043	0	0.436	274.1	302.4	-28.77	-3.389
2015-01-29 05:00:00	49044	0.002	0.819	279.6	302.3	-23.53	-3.591
2015-01-29 05:30:00	49045	0.005	0.863	278.9	302.5	-24.45	-3.487
2015-01-29 06:00:00	49046	0.004	0.735	274	302.2	-28.96	-3.413
2015-01-29 06:30:00	49047	0	1.142	258.4	300.6	-43.31	-3.484
2015-01-29 07:00:00	49048	0.001	1.173	263.3	300.7	-38.57	-3.476
2015-01-29 07:30:00	49049	0.147	0.947	273.6	301.9	-29.08	-3.317
2015-01-29 08:00:00	49050	8.12	1.881	275.4	302.8	-21.19	-3.173
2015-01-29 08:30:00	49051	34.69	5.126	268.4	303.7	-5.735	-3.037
2015-01-29 09:00:00	49052	84.3	11.1	239.5	303.7	9.06	-2.693
2015-01-29 09:30:00	49053	168.2	19.76	222	305.4	65.11	-1.482
2015-01-29 10:00:00	49054	263.8	27.68	223.3	311.5	148	0.341
2015-01-29 10:30:00	49055	323.1	32.54	225.5	317.2	198.8	1.481
2015-01-29 11:00:00	49056	361.3	37.86	225.5	322.5	226.4	2.089
2015-01-29 11:30:00	49057	480.3	44.35	226.2	330.1	332	3.986
2015-01-29 12:00:00	49058	505.6	45.62	228.5	336.4	352.1	4.833
2015-01-29 12:30:00	49059	555.1	53.28	224.7	337.7	388.8	3.562
2015-01-29 13:00:00	49060	583.5	56.24	223.1	340.1	410.3	3.62
2015-01-29 13:30:00	49061	582.3	55.36	222.1	339.8	409.1	3.596
2015-01-29 14:00:00	49062	535	49.51	222.8	339.1	369.3	3.753
2015-01-29 14:30:00	49063	492.4	43.58	222.1	336.7	334.2	3.882
2015-01-29 15:00:00	49064	436.2	36.91	220.5	332.3	287.5	3.669
2015-01-29 15:30:00	49065	360.8	28.04	221	330.4	223.3	4.264
2015-01-29 16:00:00	49066	274.1	19.21	219.8	324.7	150	3.731
2015-01-29 16:30:00	49067	182.1	12.91	218.4	320.7	66.89	3.187
2015-01-29 17:00:00	49068	93.9	9.26	217.5	318	-15.88	2.577
2015-01-29 17:30:00	49069	24.3	4.324	216.8	315.7	-78.94	1.532
2015-01-29 18:00:00	49070	0.507	1.967	215.3	313.1	-99.3	0.521
2015-01-29 18:30:00	49071	0	2.041	213.8	310.8	-99.1	0.044
2015-01-29 19:00:00	49072	0	1.723	212.9	310.3	-99.2	-0.072
2015-01-29 19:30:00	49073	0	1.979	212.5	308.7	-98.2	-0.357
2015-01-29 20:00:00	49074	0	2.07	211.8	307.7	-98	-0.605
2015-01-29 20:30:00	49075	0	2.442	211.2	305.2	-96.4	-1.118
2015-01-29 21:00:00	49076	0	2.759	209.2	303.1	-96.6	-1.78
2015-01-29 21:30:00	49077	0	2.665	207.7	302	-97	-2.111
2015-01-29 22:00:00	49078	0	2.635	206.7	300.7	-96.7	-2.455
2015-01-29 22:30:00	49079	0	2.887	205.8	298.7	-95.8	-2.898
2015-01-29 23:00:00	49080	0	2.659	204.5	297.9	-96	-3.111
2015-01-29 23:30:00	49081	0	2.467	202.9	296.4	-95.9	-3.398
2015-01-30	49082	0	2.65	201.9	295.2	-96	-3.707
2015-01-30 00:30:00	49083	0	2.624	200.7	294.3	-96.3	-3.861
2015-01-30 01:00:00	49084	0	2.696	200	293.9	-96.6	-4.035
2015-01-30 01:30:00	49085	0	2.856	199	292.8	-96.6	-4.304
2015-01-30 02:00:00	49086	0	2.793	198.2	291.7	-96.4	-4.564
2015-01-30 02:30:00	49087	0	2.938	197.8	291.3	-96.5	-4.712
2015-01-30 03:00:00	49088	0	2.871	197.8	290.7	-95.7	-4.827
2015-01-30 03:30:00	49089	0	2.715	197.7	290.6	-95.6	-4.911
2015-01-30 04:00:00	49090	0	3.007	197.4	289.2	-94.9	-5.168
2015-01-30 04:30:00	49091	0	3.006	197.1	289.4	-95.3	-5.111
2015-01-30 05:00:00	49092	0	3.156	197.2	288.9	-94.9	-5.167
2015-01-30 05:30:00	49093	0	3.025	196.9	287.7	-93.8	-5.366
2015-01-30 06:00:00	49094	0	3.049	196.6	287.3	-93.8	-5.462
2015-01-30 06:30:00	49095	0	2.61	196.5	287.1	-93.3	-5.311
2015-01-30 07:00:00	49096	0	3.151	196.3	285.6	-92.4	-5.738
2015-01-30 07:30:00	49097	0.594	3.203	196	286.9	-93.5	-5.581
2015-01-30 08:00:00	49098	25.83	7.341	194.9	287.2	-73.81	-4.941
2015-01-30 08:30:00	49099	93.7	13.15	194.3	288.7	-13.78	-2.867
2015-01-30 09:00:00	49100	181.4	20.48	194.9	292.9	62.83	-1.684
2015-01-30 09:30:00	49101	276.2	27.19	196.7	298.2	147.4	-0.769
2015-01-30 10:00:00	49102	364.3	32.82	199	304.1	226.3	0.262
2015-01-30 10:30:00	49103	442.3	39.09	201.5	310.9	293.8	1.205
2015-01-30 11:00:00	49104	458.7	46.3	204.1	317.5	298.9	1.258
2015-01-30 11:30:00	49105	557.3	51.26	205	320.8	390.2	1.008
2015-01-30 12:00:00	49106	592.5	53.96	206.8	326.8	418.6	1.555
2015-01-30 12:30:00	49107	608	55.86	208.1	329.7	430.5	1.581
2015-01-30 13:00:00	49108	610.9	55.98	209	332.5	431.5	2.123
2015-01-30 13:30:00	49109	596.5	54.15	210.7	334.6	418.5	2.443
2015-01-30 14:00:00	49110	562.8	48.58	212.2	336.1	390.2	3.477
2015-01-30 14:30:00	49111	515.5	42.31	212	333.2	352	3.74
2015-01-30 15:00:00	49112	452.7	35.43	212.6	330.2	299.6	3.687
2015-01-30 15:30:00	49113	376.7	29.49	211.8	325.4	233.6	3.138
2015-01-30 16:00:00	49114	290	19.75	211.7	320.9	161.1	3.126
2015-01-30 16:30:00	49115	197.3	12.27	212.2	317.2	80	3.197
2015-01-30 17:00:00	49116	105.5	9.61	211.7	314.6	-6.976	2.577
2015-01-30 17:30:00	49117	29.75	4.92	211.2	311.7	-75.68	1.686
2015-01-30 18:00:00	49118	0.397	2.299	209.9	309.3	-101.3	0.445
2015-01-30 18:30:00	49119	0	2.26	208.7	309	-102.6	0.197
2015-01-30 19:00:00	49120	0	2.438	208	307.6	-102	-0.084
2015-01-30 19:30:00	49121	0	2.536	207.4	306.1	-101.2	-0.416
2015-01-30 20:00:00	49122	0	3.094	206.6	303.4	-99.9	-1.036
2015-01-30 20:30:00	49123	0	3.054	205.1	303.2	-101.2	-1.406
2015-01-30 21:00:00	49124	0	2.85	203.8	301.7	-100.7	-1.746
2015-01-30 21:30:00	49125	0	2.841	203.4	300.5	-100	-1.992
2015-01-30 22:00:00	49126	0	2.309	202.7	299.3	-99	-2.132
2015-01-30 22:30:00	49127	0	2.367	201.5	298	-98.8	-2.436
2015-01-30 23:00:00	49128	0	2.656	200.1	296.1	-98.7	-2.899
2015-01-30 23:30:00	49129	0	2.605	199.3	295.3	-98.6	-3.076
2015-01-31	49130	0	2.848	198.3	294.5	-99.1	-3.36
2015-01-31 00:30:00	49131	0	3.007	197.6	292.6	-98	-3.58
2015-01-31 01:00:00	49132	0	3.515	197.1	291	-97.4	-4.118
2015-01-31 01:30:00	49133	0	3.18	196.7	291.3	-97.8	-4.046
2015-01-31 02:00:00	49134	0	2.973	196	289.7	-96.7	-4.293
2015-01-31 02:30:00	49135	0	3.182	195.2	289.4	-97.3	-4.683
2015-01-31 03:00:00	49136	0	3.337	194.9	288.7	-97.1	-4.82
2015-01-31 03:30:00	49137	0	2.916	194.5	288.4	-96.8	-4.695
2015-01-31 04:00:00	49138	0	2.689	193.7	287	-95.9	-4.854
2015-01-31 04:30:00	49139	0	2.171	192.9	285	-94.3	-5.168
2015-01-31 05:00:00	49140	0	2.149	192.4	283.7	-93.5	-5.392
2015-01-31 05:30:00	49141	0	1.816	191.2	283.7	-94.4	-5.763
2015-01-31 06:00:00	49142	0	1.971	190.9	283.2	-94.2	-5.961
2015-01-31 06:30:00	49143	0	2.277	190.8	282.2	-93.7	-6.195
2015-01-31 07:00:00	49144	0	2	190.6	281.9	-93.3	-6.276
2015-01-31 07:30:00	49145	0.646	2.329	190.5	281.2	-92.4	-6.454
2015-01-31 08:00:00	49146	26.63	7.104	190.2	280	-70.27	-6.156
2015-01-31 08:30:00	49147	95.5	13.1	190.3	282.2	-9.53	-4.271
2015-01-31 09:00:00	49148	178.6	20.02	191.5	287.7	62.43	-2.899
2015-01-31 09:30:00	49149	278.6	27.95	193.4	295.2	149	-1.588
2015-01-31 10:00:00	49150	365.9	32.92	196.6	303	226.5	0.058
2015-01-31 10:30:00	49151	445	40.66	198.9	309.1	294.1	0.438
2015-01-31 11:00:00	49152	457.5	46.23	202.4	317.7	296	1.646
2015-01-31 11:30:00	49153	549.5	48.88	206.4	324.9	382.1	2.305
2015-01-31 12:00:00	49154	581.5	51.67	209.4	331.1	408.2	2.937
2015-01-31 12:30:00	49155	593.3	53.4	211.6	335.7	415.8	3.429
2015-01-31 13:00:00	49156	598.3	52.63	213.7	340.2	419.1	4.545
2015-01-31 13:30:00	49157	590.9	51.68	214	341.2	412.1	4.594
2015-01-31 14:00:00	49158	559.3	47.14	215.2	342.3	385.1	5.101
2015-01-31 14:30:00	49159	507.5	39.53	216.2	340.8	343.4	6.203
2015-01-31 15:00:00	49160	443.4	29.49	217.9	338.5	293.4	7.123
2015-01-31 15:30:00	49161	365.6	21.93	217.8	334.7	226.8	7.675
2015-01-31 16:00:00	49162	278.7	13.6	217.6	327.7	154.9	6.948
2015-01-31 16:30:00	49163	183.2	7.749	217.5	320.8	72.17	6.086
2015-01-31 17:00:00	49164	71.36	3.937	217.8	316.4	-31.18	4.605
2015-01-31 17:30:00	49165	18.41	3.574	215.9	314.4	-83.6	1.925
2015-01-31 18:00:00	49166	0.282	2.479	213.6	309.4	-98	0.614
2015-01-31 18:30:00	49167	0	2.662	212.5	307.4	-97.6	0.126
2015-01-31 19:00:00	49168	0	2.592	212.5	304.5	-94.7	-0.058
2015-01-31 19:30:00	49169	0	2.688	212.5	303.7	-93.9	-0.276
2015-01-31 20:00:00	49170	0	2.529	212.4	303.8	-93.9	-0.403
2015-01-31 20:30:00	49171	0	2.644	212.9	301.8	-91.6	-0.589
2015-01-31 21:00:00	49172	0	3.116	211.5	300.3	-91.9	-1.054
2015-01-31 21:30:00	49173	0	3.399	210.7	299.2	-91.9	-1.398
2015-01-31 22:00:00	49174	0	3.49	210.7	297.5	-90.2	-1.5
2015-01-31 22:30:00	49175	0	3.3	210.9	295.9	-88.3	-1.646
2015-01-31 23:00:00	49176	0	2.743	211	295.1	-86.9	-1.542
2015-01-31 23:30:00	49177	0	2.86	209.9	294.3	-87.2	-2.296
2015-02-01	49178	0	2.679	208.5	293.2	-87.4	-2.604
2015-02-01 00:30:00	49179	0	3.173	208.1	292.1	-87.2	-3.373
2015-02-01 01:00:00	49180	0	3.42	207.8	291.7	-87.3	-3.562
2015-02-01 01:30:00	49181	0	2.785	207.4	290.7	-86.1	-3.596
2015-02-01 02:00:00	49182	0	3.207	207.2	289.4	-85.4	-4.193
2015-02-01 02:30:00	49183	0	3.117	207.3	288.6	-84.4	-4.152
2015-02-01 03:00:00	49184	0	3.033	206.5	287.3	-83.9	-4.435
2015-02-01 03:30:00	49185	0	2.564	206.1	287.2	-83.7	-4.554
2015-02-01 04:00:00	49186	0	2.384	205.5	286.7	-83.6	-4.672
	-9999	-9999	-9999	-9999	-9999	-9999	-9999
	-9999	-9999	-9999	-9999	-9999	-9999	-9999
	-9999	-9999	-9999	-9999	-9999	-9999	-9999
	-9999	-9999	-9999	-9999	-9999	-9999	-9999
	-9999	-9999	-9999	-9999	-9999	-9999	-9999
	-9999	-9999	-9999	-9999	-9999	-9999	-9999
	-9999	-9999	-9999	-9999	-9999	-9999	-9999
	-9999	-9999	-9999	-9999	-9999	-9999	-9999
	-9999	-9999	-9999	-9999	-9999	-9999	-9999
	-9999	-9999	-9999	-9999	-9999	-9999	-9999
	-9999	-9999	-9999	-9999	-9999	-9999	-9999
	-9999	-9999	-9999	-9999	-9999	-9999	-9999
	-9999	-9999	-9999	-9999	-9999	-9999	-9999
	-9999	-9999	-9999	-9999	-9999	-9999	-9999
	-9999	-9999	-9999	-9999	-9999	-9999	-9999
	-9999	-9999	-9999	-9999	-9999	-9999	-9999
	-9999	-9999	-9999	-9999	-9999	-9999	-9999
	-9999	-9999	-9999	-9999	-9999	-9999	-9999
	-9999	-9999	-9999	-9999	-9999	-9999	-9999
	-9999	-9999	-9999	-9999	-9999	-9999	-9999
	-9999	-9999	-9999	-9999	-9999	-9999	-9999
	-9999	-9999	-9999	-9999	-9999	-9999	-9999
	-9999	-9999	-9999	-9999	-9999	-9999	-9999
	-9999	-9999	-9999	-9999	-9999	-9999	-9999
	-9999	-9999	-9999	-9999	-9999	-9999	-9999
	-9999	-9999	-9999	-9999	-9999	-9999	-9999
	-9999	-9999	-9999	-9999	-9999	-9999	-9999
	-9999	-9999	-9999	-9999	-9999	-9999	-9999
	-9999	-9999	-9999	-9999	-9999	-9999	-9999
	-9999	-9999	-9999	-9999	-9999	-9999	-9999
	-9999	-9999	-9999	-9999	-9999	-9999	-9999
	-9999	-9999	-9999	-9999	-9999	-9999	-9999
	-9999	-9999	-9999	-9999	-9999	-9999	-9999
	-9999	-9999	-9999	-9999	-9999	-9999	-9999
	-9999	-9999	-9999	-9999	-9999	-9999	-9999
	-9999	-9999	-9999	-9999	-9999	-9999	-9999
	-9999	-9999	-9999	-9999	-9999	-9999	-9999
	-9999	-9999	-9999	-9999	-9999	-9999	-9999
	-9999	-9999	-9999	-9999	-9999	-9999	-9999
	-9999	-9999	-9999	-9999	-9999	-9999	-9999
	-9999	-9999	-9999	-9999	-9999	-9999	-9999
	-9999	-9999	-9999	-9999	-9999	-9999	-9999
	-9999	-9999	-9999	-9999	-9999	-9999	-9999
	-9999	-9999	-9999	-9999	-9999	-9999	-9999
	-9999	-9999	-9999	-9999	-9999	-9999	-9999
	-9999	-9999	-9999	-9999	-9999	-9999	-9999
	-9999	-9999	-9999	-9999	-9999	-9999	-9999
	-9999	-9999	-9999	-9999	-9999	-9999	-9999
	-9999	-9999	-9999	-9999	-9999	-9999	-9999
	-9999	-9999	-9999	-9999	-9999	-9999	-9999
	-9999	-9999	-9999	-9999	-9999	-9999	-9999
	-9999	-9999	-9999	-9999	-9999	-9999	-9999
	-9999	-9999	-9999	-9999	-9999	-9999	-9999
	-9999	-9999	-9999	-9999	-9999	-9999	-9999
	-9999	-9999	-9999	-9999	-9999	-9999	-9999
	-9999	-9999	-9999	-9999	-9999	-9999	-9999
	-9999	-9999	-9999	-9999	-9999	-9999	-9999
	-9999	-9999	-9999	-9999	-9999	-9999	-9999
	-9999	-9999	-9999	-9999	-9999	-9999	-9999
	-9999	-9999	-9999	-9999	-9999	-9999	-9999
	-9999	-9999	-9999	-9999	-9999	-9999	-9999
	-9999	-9999	-9999	-9999	-9999	-9999	-9999
	-9999	-9999	-9999	-9999	-9999	-9999	-9999
	-9999	-9999	-9999	-9999	-9999	-9999	-9999
	-9999	-9999	-9999	-9999	-9999	-9999	-9999
	-9999	-9999	-9999	-9999	-9999	-9999	-9999
	-9999	-9999	-9999	-9999	-9999	-9999	-9999
	-9999	-9999	-9999	-9999	-9999	-9999	-9999
	-9999	-9999	-9999	-9999	-9999	-9999	-9999
	-9999	-9999	-9999	-9999	-9999	-9999	-9999
	-9999	-9999	-9999	-9999	-9999	-9999	-9999
	-9999	-9999	-9999	-9999	-9999	-9999	-9999
	-9999	-9999	-9999	-9999	-9999	-9999	-9999
	-9999	-9999	-9999	-9999	-9999	-9999	-9999
	-9999	-9999	-9999	-9999	-9999	-9999	-9999
	-9999	-9999	-9999	-9999	-9999	-9999	-9999
	-9999	-9999	-9999	-9999	-9999	-9999	-9999
	-9999	-9999	-9999	-9999	-9999	-9999	-9999
	-9999	-9999	-9999	-9999	-9999	-9999	-9999
	-9999	-9999	-9999	-9999	-9999	-9999	-9999
	-9999	-9999	-9999	-9999	-9999	-9999	-9999
	-9999	-9999	-9999	-9999	-9999	-9999	-9999
	-9999	-9999	-9999	-9999	-9999	-9999	-9999
	-9999	-9999	-9999	-9999	-9999	-9999	-9999
	-9999	-9999	-9999	-9999	-9999	-9999	-9999
	-9999	-9999	-9999	-9999	-9999	-9999	-9999
	-9999	-9999	-9999	-9999	-9999	-9999	-9999
	-9999	-9999	-9999	-9999	-9999	-9999	-9999
	-9999	-9999	-9999	-9999	-9999	-9999	-9999
	-9999	-9999	-9999	-9999	-9999	-9999	-9999
	-9999	-9999	-9999	-9999	-9999	-9999	-9999
	-9999	-9999	-9999	-9999	-9999	-9999	-9999
2015-02-03 02:30:00	49269	0.001	1.552	271	309.7	-40.23	-0.672
2015-02-03 03:00:00	49270	0	1.845	254.1	307	-54.69	-1.013
2015-02-03 03:30:00	49271	0	2.442	239.8	304	-66.65	-1.665
2015-02-03 04:00:00	49272	0	3.095	235.5	302.2	-69.78	-2.17
2015-02-03 04:30:00	49273	0.003	3.52	235.7	301.3	-69.16	-2.127
2015-02-03 05:00:00	49274	0	2.623	246.9	302.2	-57.94	-1.767
2015-02-03 05:30:00	49275	0	2.873	245	301.9	-59.81	-2.076
2015-02-03 06:00:00	49276	0.002	2.949	234.2	301	-69.75	-2.131
2015-02-03 06:30:00	49277	0	2.521	233.7	299.3	-68.15	-2.401
2015-02-03 07:00:00	49278	0.005	3.037	234	298.6	-67.55	-3.061
2015-02-03 07:30:00	49279	0.848	3.504	234.1	298.7	-67.3	-2.823
2015-02-03 08:00:00	49280	16.2	5.327	234.5	299.4	-54.03	-2.653
2015-02-03 08:30:00	49281	55	10.53	234.9	302.3	-23.01	-2.158
2015-02-03 09:00:00	49282	98	15.19	235.6	306.9	11.53	-0.687
2015-02-03 09:30:00	49283	160.9	20.62	236.4	312.2	64.48	1.218
2015-02-03 10:00:00	49284	232.2	26.61	237.6	317.2	126	2.224
2015-02-03 10:30:00	49285	310.8	31.66	240.3	325.5	194	4.376
2015-02-03 11:00:00	49286	356.3	37.19	242.9	333.7	228.3	6.045
2015-02-03 11:30:00	49287	439.8	43.41	244.8	340.4	300.8	6.688
2015-02-03 12:00:00	49288	470	47.06	247.2	346.3	323.8	6.988
2015-02-03 12:30:00	49289	492.9	50.8	249.8	350.8	341.1	7.101
2015-02-03 13:00:00	49290	511	52.72	250.1	352.9	355.4	7.297
2015-02-03 13:30:00	49291	513.9	51.61	250.7	355	357.9	7.719
2015-02-03 14:00:00	49292	487	48.48	250.5	355.5	333.6	7.905
2015-02-03 14:30:00	49293	430.5	41.92	251	354.8	284.8	8.22
2015-02-03 15:00:00	49294	376	35.33	251.3	354.1	237.9	8.7
2015-02-03 15:30:00	49295	308.7	29.11	249.7	350.6	178.8	8.33
2015-02-03 16:00:00	49296	224.7	21.08	248.7	346.5	105.9	7.889
2015-02-03 16:30:00	49297	173.7	15.35	247.4	343.4	62.32	7.815
2015-02-03 17:00:00	49298	92.8	9.81	244.5	339.8	-12.31	7.313
2015-02-03 17:30:00	49299	35.83	5.717	242	335.9	-63.79	6.576
2015-02-03 18:00:00	49300	1.494	2.337	238.8	331.1	-93.1	5.47
2015-02-03 18:30:00	49301	0	2.186	235.5	329.9	-96.6	5.1
2015-02-03 19:00:00	49302	0	2.178	234.6	329.1	-96.6	4.929
2015-02-03 19:30:00	49303	0	2.154	234.1	328.4	-96.4	4.737
2015-02-03 20:00:00	49304	0	2.164	232.8	325.8	-95.2	4.388
2015-02-03 20:30:00	49305	0	2.235	231.6	324.4	-95	3.913
2015-02-03 21:00:00	49306	0	1.611	230.6	324.2	-95.3	3.451
2015-02-03 21:30:00	49307	0	1.505	228.4	322	-95.1	2.785
2015-02-03 22:00:00	49308	0	1.477	226.7	319.2	-94	2.095
2015-02-03 22:30:00	49309	0	1.602	223.9	315.7	-93.5	1.224
2015-02-03 23:00:00	49310	0	1.673	220.7	312.4	-93.3	0.366
2015-02-03 23:30:00	49311	0	1.858	218	309.4	-93.2	-0.407
2015-02-04	49312	0	2.145	216.1	307.4	-93.4	-0.95
2015-02-04 00:30:00	49313	0	2.188	215.1	306.3	-93.3	-1.224
2015-02-04 01:00:00	49314	0	2.425	215.1	304.7	-92	-1.626
2015-02-04 01:30:00	49315	0	2.631	215.2	303.7	-91.1	-1.844
2015-02-04 02:00:00	49316	0	2.583	215.5	303.6	-90.7	-1.905
2015-02-04 02:30:00	49317	0	2.566	215.2	302.9	-90.2	-2.023
2015-02-04 03:00:00	49318	0	2.181	214.8	303.4	-90.8	-1.951
2015-02-04 03:30:00	49319	0	2.128	214.2	302.8	-90.8	-2.045
2015-02-04 04:00:00	49320	0	2.41	213.5	301.7	-90.6	-2.348
2015-02-04 04:30:00	49321	0	2.407	212.5	301.1	-91	-2.507
2015-02-04 05:00:00	49322	0	2.379	211.6	300.5	-91.3	-2.637
2015-02-04 05:30:00	49323	0	2.17	210.9	300.1	-91.3	-2.675
2015-02-04 06:00:00	49324	0	2.296	210.6	299.8	-91.5	-2.793
2015-02-04 06:30:00	49325	0	2.323	210.3	299.8	-91.8	-2.766
2015-02-04 07:00:00	49326	0	2.408	210.1	299.1	-91.5	-2.832
2015-02-04 07:30:00	49327	0.995	2.843	209.9	298.4	-90.4	-3.002
2015-02-04 08:00:00	49328	29.36	7.25	209.7	299.2	-67.34	-2.341
2015-02-04 08:30:00	49329	103.7	14.18	209.9	300.7	-1.212	-0.393
2015-02-04 09:00:00	49330	192.8	21.01	211	305.3	77.37	1.118
2015-02-04 09:30:00	49331	288.2	27.61	215.3	312.3	163.6	2.463
2015-02-04 10:00:00	49332	327.7	30.11	219	318.4	198.2	3.101
2015-02-04 10:30:00	49333	403.8	40.13	242	327.7	278	3.859
2015-02-04 11:00:00	49334	231.3	26.59	267.9	328.7	143.9	2.291
2015-02-04 11:30:00	49335	237.5	28.16	267.4	329.1	147.6	2.082
2015-02-04 12:00:00	49336	225.5	26.11	273.3	331.5	141.1	2.586
2015-02-04 12:30:00	49337	310	33.87	265.4	334.5	207.1	3.071
2015-02-04 13:00:00	49338	204.9	22.21	272.5	333.1	122.2	3.051
2015-02-04 13:30:00	49339	466.9	44.53	244.1	341.6	324.7	4.555
2015-02-04 14:00:00	49340	526.6	47.79	238.2	346.6	370.3	5.667
2015-02-04 14:30:00	49341	515.1	45.76	238.3	349	358.6	6.781
2015-02-04 15:00:00	49342	431.1	40.39	246.8	346.4	291.1	6.544
2015-02-04 15:30:00	49343	351.2	35.58	260.6	347.3	228.9	6.518
2015-02-04 16:00:00	49344	215.5	21.12	251.5	340.7	105.2	5.936
2015-02-04 16:30:00	49345	143.9	14	252.6	337.3	45.18	5.786
2015-02-04 17:00:00	49346	112.4	11.36	248.1	334.2	14.97	6.024
2015-02-04 17:30:00	49347	34.68	4.669	241.8	330.8	-58.91	5.134
2015-02-04 18:00:00	49348	1.491	1.888	233.8	326.5	-93	3.352
2015-02-04 18:30:00	49349	0	1.827	230.2	323.7	-95.3	2.668
2015-02-04 19:00:00	49350	0	1.868	227.4	321.5	-95.9	2.173
2015-02-04 19:30:00	49351	0	1.936	224.9	319.3	-96.3	1.763
2015-02-04 20:00:00	49352	0	1.986	223.7	317.6	-95.9	1.41
	-9999	-9999	-9999	-9999	-9999	-9999	-9999
	-9999	-9999	-9999	-9999	-9999	-9999	-9999
	-9999	-9999	-9999	-9999	-9999	-9999	-9999
	-9999	-9999	-9999	-9999	-9999	-9999	-9999
	-9999	-9999	-9999	-9999	-9999	-9999	-9999
	-9999	-9999	-9999	-9999	-9999	-9999	-9999
	-9999	-9999	-9999	-9999	-9999	-9999	-9999
	-9999	-9999	-9999	-9999	-9999	-9999	-9999
	-9999	-9999	-9999	-9999	-9999	-9999	-9999
	-9999	-9999	-9999	-9999	-9999	-9999	-9999
	-9999	-9999	-9999	-9999	-9999	-9999	-9999
	-9999	-9999	-9999	-9999	-9999	-9999	-9999
	-9999	-9999	-9999	-9999	-9999	-9999	-9999
	-9999	-9999	-9999	-9999	-9999	-9999	-9999
	-9999	-9999	-9999	-9999	-9999	-9999	-9999
	-9999	-9999	-9999	-9999	-9999	-9999	-9999
	-9999	-9999	-9999	-9999	-9999	-9999	-9999
	-9999	-9999	-9999	-9999	-9999	-9999	-9999
	-9999	-9999	-9999	-9999	-9999	-9999	-9999
	-9999	-9999	-9999	-9999	-9999	-9999	-9999
	-9999	-9999	-9999	-9999	-9999	-9999	-9999
	-9999	-9999	-9999	-9999	-9999	-9999	-9999
	-9999	-9999	-9999	-9999	-9999	-9999	-9999
	-9999	-9999	-9999	-9999	-9999	-9999	-9999
	-9999	-9999	-9999	-9999	-9999	-9999	-9999
	-9999	-9999	-9999	-9999	-9999	-9999	-9999
	-9999	-9999	-9999	-9999	-9999	-9999	-9999
	-9999	-9999	-9999	-9999	-9999	-9999	-9999
	-9999	-9999	-9999	-9999	-9999	-9999	-9999
	-9999	-9999	-9999	-9999	-9999	-9999	-9999
	-9999	-9999	-9999	-9999	-9999	-9999	-9999
	-9999	-9999	-9999	-9999	-9999	-9999	-9999
	-9999	-9999	-9999	-9999	-9999	-9999	-9999
	-9999	-9999	-9999	-9999	-9999	-9999	-9999
	-9999	-9999	-9999	-9999	-9999	-9999	-9999
	-9999	-9999	-9999	-9999	-9999	-9999	-9999
	-9999	-9999	-9999	-9999	-9999	-9999	-9999
	-9999	-9999	-9999	-9999	-9999	-9999	-9999
	-9999	-9999	-9999	-9999	-9999	-9999	-9999
	-9999	-9999	-9999	-9999	-9999	-9999	-9999
	-9999	-9999	-9999	-9999	-9999	-9999	-9999
	-9999	-9999	-9999	-9999	-9999	-9999	-9999
	-9999	-9999	-9999	-9999	-9999	-9999	-9999
	-9999	-9999	-9999	-9999	-9999	-9999	-9999
	-9999	-9999	-9999	-9999	-9999	-9999	-9999
	-9999	-9999	-9999	-9999	-9999	-9999	-9999
	-9999	-9999	-9999	-9999	-9999	-9999	-9999
	-9999	-9999	-9999	-9999	-9999	-9999	-9999
	-9999	-9999	-9999	-9999	-9999	-9999	-9999
	-9999	-9999	-9999	-9999	-9999	-9999	-9999
	-9999	-9999	-9999	-9999	-9999	-9999	-9999
	-9999	-9999	-9999	-9999	-9999	-9999	-9999
	-9999	-9999	-9999	-9999	-9999	-9999	-9999
	-9999	-9999	-9999	-9999	-9999	-9999	-9999
	-9999	-9999	-9999	-9999	-9999	-9999	-9999
	-9999	-9999	-9999	-9999	-9999	-9999	-9999
	-9999	-9999	-9999	-9999	-9999	-9999	-9999
	-9999	-9999	-9999	-9999	-9999	-9999	-9999
	-9999	-9999	-9999	-9999	-9999	-9999	-9999
	-9999	-9999	-9999	-9999	-9999	-9999	-9999
	-9999	-9999	-9999	-9999	-9999	-9999	-9999
	-9999	-9999	-9999	-9999	-9999	-9999	-9999
	-9999	-9999	-9999	-9999	-9999	-9999	-9999
	-9999	-9999	-9999	-9999	-9999	-9999	-9999
	-9999	-9999	-9999	-9999	-9999	-9999	-9999
	-9999	-9999	-9999	-9999	-9999	-9999	-9999
	-9999	-9999	-9999	-9999	-9999	-9999	-9999
	-9999	-9999	-9999	-9999	-9999	-9999	-9999
	-9999	-9999	-9999	-9999	-9999	-9999	-9999
	-9999	-9999	-9999	-9999	-9999	-9999	-9999
	-9999	-9999	-9999	-9999	-9999	-9999	-9999
	-9999	-9999	-9999	-9999	-9999	-9999	-9999
	-9999	-9999	-9999	-9999	-9999	-9999	-9999
	-9999	-9999	-9999	-9999	-9999	-9999	-9999
	-9999	-9999	-9999	-9999	-9999	-9999	-9999
	-9999	-9999	-9999	-9999	-9999	-9999	-9999
	-9999	-9999	-9999	-9999	-9999	-9999	-9999
	-9999	-9999	-9999	-9999	-9999	-9999	-9999
	-9999	-9999	-9999	-9999	-9999	-9999	-9999
	-9999	-9999	-9999	-9999	-9999	-9999	-9999
	-9999	-9999	-9999	-9999	-9999	-9999	-9999
	-9999	-9999	-9999	-9999	-9999	-9999	-9999
	-9999	-9999	-9999	-9999	-9999	-9999	-9999
	-9999	-9999	-9999	-9999	-9999	-9999	-9999
2015-02-06 14:30:00	49437	504	43.83	266.1	375.8	350.5	13.28
2015-02-06 15:00:00	49438	374.4	34.26	267.5	370.7	237	11.92
2015-02-06 15:30:00	49439	247.8	24.68	271.8	364.5	130.4	10.87
2015-02-06 16:00:00	49440	150.7	17.39	274.7	357.7	50.32	9.39
2015-02-06 16:30:00	49441	101.2	12.96	277.1	352.7	12.66	8.46
2015-02-06 17:00:00	49442	73.15	9.82	269.8	348.6	-15.42	8.08
2015-02-06 17:30:00	49443	36.66	6.338	259	342.9	-53.64	7.481
2015-02-06 18:00:00	49444	3.029	2.779	251.1	337.2	-85.8	6.569
2015-02-06 18:30:00	49445	0	3.187	250.9	332.2	-84.5	5.81
2015-02-06 19:00:00	49446	0	3.03	256	332.8	-79.81	5.788
2015-02-06 19:30:00	49447	0	2.899	255	332.1	-79.94	5.617
2015-02-06 20:00:00	49448	0.008	3.023	260.1	331	-73.87	5.335
2015-02-06 20:30:00	49449	0.001	2.772	260	330.9	-73.69	5.389
2015-02-06 21:00:00	49450	0	2.933	247.5	327.5	-82.9	5.161
2015-02-06 21:30:00	49451	0	3.078	245.1	324	-82	4.829
2015-02-06 22:00:00	49452	0	2.64	245.1	322.5	-80.1	5.039
2015-02-06 22:30:00	49453	0.001	2.319	245	322.7	-80	5.22
2015-02-06 23:00:00	49454	0	2.187	242.4	322.8	-82.5	4.765
2015-02-06 23:30:00	49455	0.004	3.092	240.1	324.6	-87.6	4.336
2015-02-07	49456	0	3.335	241.2	326.3	-88.4	4.517
2015-02-07 00:30:00	49457	0	2.565	240.8	328.6	-90.3	4.838
2015-02-07 01:00:00	49458	0	2.536	238.8	327.4	-91.1	4.528
2015-02-07 01:30:00	49459	0	2.727	237.3	326.1	-91.6	4.161
2015-02-07 02:00:00	49460	0	2.588	235.9	325.8	-92.5	3.99
2015-02-07 02:30:00	49461	0	2.342	234.7	326.1	-93.7	3.851
2015-02-07 03:00:00	49462	0	2.324	234.1	324.4	-92.6	3.474
2015-02-07 03:30:00	49463	0	2.552	233.6	322.3	-91.3	2.965
2015-02-07 04:00:00	49464	0	2.456	230.4	321.2	-93.3	2.747
2015-02-07 04:30:00	49465	0	2.342	225.2	319.3	-96.5	2.32
2015-02-07 05:00:00	49466	0	2.383	226.6	317.1	-92.9	1.812
2015-02-07 05:30:00	49467	0	2.43	231.8	316.3	-87	1.436
2015-02-07 06:00:00	49468	0	2.172	229.8	315.6	-88	1.324
2015-02-07 06:30:00	49469	0	2.227	232.2	314.8	-84.8	0.998
2015-02-07 07:00:00	49470	0	2.213	242.2	314.5	-74.5	0.797
2015-02-07 07:30:00	49471	3.34	2.781	247.6	314.5	-66.26	0.715
2015-02-07 08:00:00	49472	32.4	5.942	251.8	316.3	-38.01	0.948
2015-02-07 08:30:00	49473	76.57	10.61	255.5	318.3	3.176	1.45
2015-02-07 09:00:00	49474	88.5	11.38	258	320.5	14.63	1.594
2015-02-07 09:30:00	49475	111.7	14.2	257.2	322	32.71	1.492
2015-02-07 10:00:00	49476	126.9	15.83	257.7	323.4	45.4	1.664
2015-02-07 10:30:00	49477	148.8	18.34	258.1	324.7	63.85	1.762
2015-02-07 11:00:00	49478	158	19.37	258.5	325.7	71.46	1.832
2015-02-07 11:30:00	49479	140	17.42	261.4	325.5	58.39	1.781
2015-02-07 12:00:00	49480	127.7	16.12	262	324.6	49.02	1.486
2015-02-07 12:30:00	49481	137.1	16.86	262.2	325.4	57.05	1.541
2015-02-07 13:00:00	49482	139.2	17.01	264.6	326.6	60.11	1.85
2015-02-07 13:30:00	49483	137.8	16.49	261.4	327.1	55.67	2.085
2015-02-07 14:00:00	49484	197.8	23.22	255	327.9	101.6	1.752
2015-02-07 14:30:00	49485	285	28.21	227.3	326.6	157.5	1.663
2015-02-07 15:00:00	49486	472.6	42.06	219	334.3	315.3	3.755
2015-02-07 15:30:00	49487	395.1	33.74	217.9	332.7	246.6	4.179
2015-02-07 16:00:00	49488	310.7	24.79	215.8	329.7	172	5.015
2015-02-07 16:30:00	49489	218	14.61	213.8	324	93.1	4.794
2015-02-07 17:00:00	49490	126.9	10.56	210	318.6	7.686	3.378
2015-02-07 17:30:00	49491	49.21	7.24	205.7	314.2	-66.53	1.923
2015-02-07 18:00:00	49492	3.682	2.458	202.4	310.5	-106.9	0.098
2015-02-07 18:30:00	49493	0	2.107	199.5	307.5	-110.1	-0.895
2015-02-07 19:00:00	49494	0	2.23	197.8	305	-109.4	-1.498
2015-02-07 19:30:00	49495	0	2.101	195.8	302.3	-108.7	-2.035
2015-02-07 20:00:00	49496	0	2.119	194.5	300.6	-108.2	-2.489
2015-02-07 20:30:00	49497	0	2.216	193.8	298.7	-107.1	-2.984
2015-02-07 21:00:00	49498	0	2.172	193.5	297.2	-105.9	-3.429
2015-02-07 21:30:00	49499	0	2.235	192.1	295.4	-105.5	-3.855
2015-02-07 22:00:00	49500	0	2.386	190.4	293.9	-105.9	-4.301
2015-02-07 22:30:00	49501	0	2.412	189.4	292.8	-105.7	-4.558
2015-02-07 23:00:00	49502	0	2.685	189.2	291.4	-104.9	-4.823
2015-02-07 23:30:00	49503	0	2.662	189	290.5	-104.2	-5.063
2015-02-08	49504	0	3.053	188.3	288.9	-103.7	-5.49
2015-02-08 00:30:00	49505	0	3.26	188.5	287.5	-102.3	-5.754
2015-02-08 01:00:00	49506	0	2.606	187.5	286.8	-101.9	-5.742
2015-02-08 01:30:00	49507	0	2.294	186.7	286.2	-101.8	-5.836
2015-02-08 02:00:00	49508	0	2.314	186.5	285.7	-101.6	-5.932
2015-02-08 02:30:00	49509	0	2.692	186.5	284.3	-100.5	-6.21
2015-02-08 03:00:00	49510	0	2.752	186.6	283	-99.2	-6.395
2015-02-08 03:30:00	49511	0	2.59	186.5	281.2	-97.3	-6.583
2015-02-08 04:00:00	49512	0	2.567	186.4	282.1	-98.3	-6.614
2015-02-08 04:30:00	49513	0	2.417	186.2	282.3	-98.4	-6.653
2015-02-08 05:00:00	49514	0	2.755	185.7	281.5	-98.5	-6.967
2015-02-08 05:30:00	49515	0	3.378	185.4	280.6	-98.6	-7.361
2015-02-08 06:00:00	49516	0	3.206	185.6	281.4	-99	-7.248
2015-02-08 06:30:00	49517	0	3.185	185.5	281	-98.7	-7.293
2015-02-08 07:00:00	49518	0	3.474	185.3	279.5	-97.7	-7.569
2015-02-08 07:30:00	49519	2.645	3.73	185.1	280.7	-96.7	-7.433
2015-02-08 08:00:00	49520	38.6	8.76	184.5	281.3	-66.94	-6.707
2015-02-08 08:30:00	49521	123.4	16.69	184.5	283.6	7.649	-4.313
2015-02-08 09:00:00	49522	216.9	23.43	185.4	288.9	90	-2.868
2015-02-08 09:30:00	49523	315.5	30.5	187.3	294.6	177.6	-1.707
2015-02-08 10:00:00	49524	407.8	38.09	189.5	301.9	257.3	-0.865
2015-02-08 10:30:00	49525	487.4	45.66	191.7	308.9	324.5	-0.149
2015-02-08 11:00:00	49526	497.8	54.16	203.2	317.1	329.8	0.194
2015-02-08 11:30:00	49527	474.2	49.38	222.3	320.9	326.3	-0.378
2015-02-08 12:00:00	49528	609	60.8	211.7	328.1	431.8	0.657
2015-02-08 12:30:00	49529	655.2	62.26	200.4	334.9	458.3	1.935
2015-02-08 13:00:00	49530	652.6	60.88	202.5	339.2	455	2.667
2015-02-08 13:30:00	49531	640.2	59.29	203.6	339.8	444.8	2.712
2015-02-08 14:00:00	49532	609.4	53.54	205.4	341.2	420.1	3.639
2015-02-08 14:30:00	49533	554.3	48.71	206.4	338	373.9	3.571
2015-02-08 15:00:00	49534	483.9	37.89	208.5	336.2	318.3	5.26
2015-02-08 15:30:00	49535	402.1	30.07	209.1	331.8	249.4	5.067
2015-02-08 16:00:00	49536	310.1	23.12	207.7	324.8	169.9	3.888
2015-02-08 16:30:00	49537	205.7	14.15	208	317.7	81.9	3.054
2015-02-08 17:00:00	49538	115.8	9.76	208.4	312.8	1.697	1.904
2015-02-08 17:30:00	49539	38.77	5.562	207.6	308.5	-67.71	0.494
2015-02-08 18:00:00	49540	2.631	2.844	207	304.6	-97.9	-1.033
2015-02-08 18:30:00	49541	0	3.122	206.7	302	-98.5	-1.648
2015-02-08 19:00:00	49542	0	3.022	206.9	301.7	-97.9	-1.789
2015-02-08 19:30:00	49543	0	3.34	208	300.7	-96.1	-1.966
2015-02-08 20:00:00	49544	0	3.086	208.4	300.6	-95.3	-2.056
2015-02-08 20:30:00	49545	0	3.089	208.5	299.1	-93.7	-2.37
2015-02-08 21:00:00	49546	0	2.914	208.2	298.2	-92.8	-2.484
2015-02-08 21:30:00	49547	0	3.364	208.6	296.3	-91	-2.857
2015-02-08 22:00:00	49548	0.002	3.605	209.5	295.6	-89.7	-3.024
2015-02-08 22:30:00	49549	0	2.688	210.2	297.7	-90.2	-2.545
2015-02-08 23:00:00	49550	0	2.067	210.8	298	-89.2	-2.56
2015-02-08 23:30:00	49551	0	2.458	211.4	295.4	-86.5	-2.938
2015-02-09	49552	0	2.295	211.5	295.1	-85.9	-3.04
2015-02-09 00:30:00	49553	0	1.998	211.5	294.1	-84.6	-3.137
2015-02-09 01:00:00	49554	0	1.821	211.4	292.8	-83.2	-3.383
2015-02-09 01:30:00	49555	0	1.986	211.5	292	-82.5	-3.598
2015-02-09 02:00:00	49556	0	2.22	210.7	289.3	-80.9	-4.207
2015-02-09 02:30:00	49557	0	2.707	209.5	287.9	-81.1	-4.9
2015-02-09 03:00:00	49558	0	3.086	208.2	286.6	-81.4	-5.722
2015-02-09 03:30:00	49559	0	2.913	206.5	285.9	-82.3	-5.958
2015-02-09 04:00:00	49560	0	3.003	205.7	284.7	-82	-6.223
2015-02-09 04:30:00	49561	0	2.929	205.5	284.4	-81.8	-6.25
2015-02-09 05:00:00	49562	0	2.589	204.9	284.2	-81.8	-6.429
2015-02-09 05:30:00	49563	0	3.063	204.5	281.9	-80.4	-6.909
2015-02-09 06:00:00	49564	0	3.005	204.2	282	-80.8	-6.854
2015-02-09 06:30:00	49565	0	2.642	204.1	282	-80.6	-6.808
2015-02-09 07:00:00	49566	0	2.559	203.5	281.9	-80.9	-6.749
2015-02-09 07:30:00	49567	2.675	2.74	203.8	282.6	-78.9	-6.472
2015-02-09 08:00:00	49568	32.32	7.143	203.5	282.4	-53.77	-6.332
2015-02-09 08:30:00	49569	98.2	14.07	204.4	286	2.529	-4.521
2015-02-09 09:00:00	49570	179.6	20.41	206.6	292.9	72.8	-2.35
2015-02-09 09:30:00	49571	268.1	27.65	208.2	299.3	149.3	-1.441
2015-02-09 10:00:00	49572	355.5	36.18	209.3	305.2	223.5	-1.045
2015-02-09 10:30:00	49573	430	42.45	212	313.7	285.8	0.676
2015-02-09 11:00:00	49574	450.3	44.8	216.2	323.9	297.8	3.933
2015-02-09 11:30:00	49575	543.4	50.52	219.4	331	381.2	4.238
2015-02-09 12:00:00	49576	578.1	52.79	223.2	339.1	409.4	5.401
2015-02-09 12:30:00	49577	592.5	53.38	226.8	345.8	420.2	6.228
2015-02-09 13:00:00	49578	592	55.37	229.5	350.6	415.6	6.336
2015-02-09 13:30:00	49579	583.7	54.27	232	353.6	407.8	7.074
2015-02-09 14:00:00	49580	556.7	51	234.2	355.1	384.7	7.748
2015-02-09 14:30:00	49581	503	44.76	235.9	355.1	339.2	8.4
2015-02-09 15:00:00	49582	437.9	38.4	236.9	352.6	283.8	8.82
2015-02-09 15:30:00	49583	351.5	28.9	237.6	349	211.2	8.99
2015-02-09 16:00:00	49584	258	21.03	237.7	343.9	130.7	8.63
2015-02-09 16:30:00	49585	162.3	14.18	236.7	337.1	47.8	7.38
2015-02-09 17:00:00	49586	91	9.2	235.8	331.6	-14.04	6.307
2015-02-09 17:30:00	49587	31.73	5.337	234.5	327.6	-66.74	4.891
2015-02-09 18:00:00	49588	3.113	3.066	234	324.9	-90.9	3.794
2015-02-09 18:30:00	49589	0	2.689	234.2	322.6	-91.1	3.511
2015-02-09 19:00:00	49590	0	2.814	233.7	321.7	-90.8	3.25
2015-02-09 19:30:00	49591	0	2.733	233.3	320.5	-89.9	3.023
2015-02-09 20:00:00	49592	0	2.64	233.2	319.6	-89.1	2.83
2015-02-09 20:30:00	49593	0	3.042	232.6	315.2	-85.6	2.194
2015-02-09 21:00:00	49594	0	2.929	232	312.7	-83.6	2.187
2015-02-09 21:30:00	49595	0	2.679	231.4	310.8	-82.1	2.161
2015-02-09 22:00:00	49596	0	2.503	231.2	309.3	-80.6	2.048
2015-02-09 22:30:00	49597	0	2.272	231	309.1	-80.3	1.969
2015-02-09 23:00:00	49598	0	2.551	230	306.6	-79.1	0.75
2015-02-09 23:30:00	49599	0	3.321	228.6	304.8	-79.5	-0.267
2015-02-10	49600	0	3.526	227.8	303.1	-78.78	-0.908
2015-02-10 00:30:00	49601	0	3.698	227	302	-78.67	-1.335
2015-02-10 01:00:00	49602	0	2.949	226.2	301.7	-78.48	-1.151
2015-02-10 01:30:00	49603	0	2.58	225.5	301.1	-78.18	-1.161
2015-02-10 02:00:00	49604	0	2.846	225.2	299.1	-76.77	-1.555
2015-02-10 02:30:00	49605	0	2.702	224.3	298.1	-76.58	-1.753
2015-02-10 03:00:00	49606	0	3.628	223.1	296.4	-76.95	-2.482
2015-02-10 03:30:00	49607	0.006	3.713	223.5	295.9	-76.09	-2.685
2015-02-10 04:00:00	49608	0.057	3.649	223.4	296.2	-76.39	-2.382
2015-02-10 04:30:00	49609	0.004	3.461	223.2	295.3	-75.59	-2.647
2015-02-10 05:00:00	49610	0.004	3.491	223.5	295.7	-75.7	-1.894
2015-02-10 05:30:00	49611	0	2.702	222.1	295	-75.62	-1.909
2015-02-10 06:00:00	49612	0	2.378	221.6	294.6	-75.36	-2.136
2015-02-10 06:30:00	49613	0	2.605	221.6	293.8	-74.81	-2.43
2015-02-10 07:00:00	49614	0	2.693	221.6	293.3	-74.34	-2.657
2015-02-10 07:30:00	49615	3.487	4.258	221.5	292.9	-72.16	-3.22
2015-02-10 08:00:00	49616	34.39	8.63	222.1	295.2	-47.28	-2.666
2015-02-10 08:30:00	49617	101.3	15.03	223	300.1	9.16	0.13
2015-02-10 09:00:00	49618	179.9	19.62	226	309	77.33	3.309
2015-02-10 09:30:00	49619	279	25.33	230.3	320.3	163.7	6.493
2015-02-10 10:00:00	49620	367.8	31.55	234.8	331.6	239.4	8.81
2015-02-10 10:30:00	49621	438.7	36.87	240.4	345	297.3	11.43
2015-02-10 11:00:00	49622	466.1	45.56	245.8	357.1	309.2	11.97
2015-02-10 11:30:00	49623	537.8	47.1	251	366.8	374.9	13.02
2015-02-10 12:00:00	49624	569.6	52.46	256.4	374.3	399.1	13.78
2015-02-10 12:30:00	49625	561.8	55.48	260.9	377.1	390.2	13.12
2015-02-10 13:00:00	49626	541	54.68	266.2	379.3	373.2	13.04
2015-02-10 13:30:00	49627	482.9	48.44	276.5	381.5	329.4	13.49
2015-02-10 14:00:00	49628	524.3	52.35	280.3	386.4	365.9	14.49
2015-02-10 14:30:00	49629	391.3	38.74	284.1	383.1	253.7	14.26
2015-02-10 15:00:00	49630	274.2	29.2	279.6	374.5	150.1	12.68
2015-02-10 15:30:00	49631	320.5	31.41	281.8	377.5	193.5	13.94
2015-02-10 16:00:00	49632	212.3	21.33	283.3	371.3	102.9	13.18
2015-02-10 16:30:00	49633	202.5	17.78	268.6	366.5	86.7	13.87
2015-02-10 17:00:00	49634	101.8	9.93	265.2	360	-2.944	12.9
2015-02-10 17:30:00	49635	33.85	5.542	260.3	352	-63.36	11.1
2015-02-10 18:00:00	49636	2.8	2.978	259.5	347.9	-88.5	9.73
2015-02-10 18:30:00	49637	0	3.139	260.1	342.9	-85.9	8.86
2015-02-10 19:00:00	49638	0	3.308	259.2	340.3	-84.3	8.43
2015-02-10 19:30:00	49639	0	3.075	258.9	340.1	-84.3	8.38
2015-02-10 20:00:00	49640	0	2.679	257.8	339.4	-84.2	8.23
2015-02-10 20:30:00	49641	0	3.317	257.8	335.3	-80.8	7.465
2015-02-10 21:00:00	49642	0	3.076	257.2	333.5	-79.39	7.358
2015-02-10 21:30:00	49643	0	3.259	257.7	330.3	-75.79	6.583
2015-02-10 22:00:00	49644	0.002	2.913	256.7	328	-74.21	6.015
2015-02-10 22:30:00	49645	0	3.036	254.6	326.2	-74.64	5.164
2015-02-10 23:00:00	49646	0.004	3.344	252.4	324.4	-75.27	4.849
2015-02-10 23:30:00	49647	0	2.558	260	324	-66.64	5.221
2015-02-11	49648	0.026	2.147	267.9	326.9	-61.17	5.816
2015-02-11 00:30:00	49649	0	1.616	266.1	329.9	-65.33	5.759
2015-02-11 01:00:00	49650	0	1.113	265.7	329.3	-64.67	5.2
2015-02-11 01:30:00	49651	0	1.119	265.2	325.3	-61.23	4.062
2015-02-11 02:00:00	49652	0	1.596	269.7	323.7	-55.61	3.672
2015-02-11 02:30:00	49653	0	1.322	268.3	324.2	-57.14	3.692
2015-02-11 03:00:00	49654	0	0.951	263.6	321.9	-59.26	2.992
2015-02-11 03:30:00	49655	0	1.339	254.3	319.1	-66.15	2.461
2015-02-11 04:00:00	49656	0	1.743	241.7	315.3	-75.4	2.072
2015-02-11 04:30:00	49657	0	1.853	242.2	313	-72.73	1.644
2015-02-11 05:00:00	49658	0	1.985	240.8	312.2	-73.41	1.408
2015-02-11 05:30:00	49659	0	1.91	238.4	313.8	-77.34	1.571
2015-02-11 06:00:00	49660	0	2.027	234.1	313	-80.9	1.408
2015-02-11 06:30:00	49661	0	2.033	228.7	311.7	-85.1	1.153
2015-02-11 07:00:00	49662	0	2.065	226.4	310.2	-85.8	0.856
2015-02-11 07:30:00	49663	3.457	2.78	225.8	310	-83.5	0.775
2015-02-11 08:00:00	49664	40.94	8.22	225.6	310.3	-52.07	1.152
2015-02-11 08:30:00	49665	121.9	16.56	225.3	313.2	17.4	2.657
2015-02-11 09:00:00	49666	208.8	22.38	227	319.2	94.3	4.121
2015-02-11 09:30:00	49667	303.1	30.04	228.9	325.5	176.5	4.944
2015-02-11 10:00:00	49668	391.1	37.55	231.5	333.1	251.9	5.898
2015-02-11 10:30:00	49669	470.6	45.49	234.6	340.9	318.7	6.604
2015-02-11 11:00:00	49670	487.3	51.51	237.9	350.5	323.1	8.13
2015-02-11 11:30:00	49671	581.4	56.48	240.2	357.1	407.9	8.72
2015-02-11 12:00:00	49672	618.4	60.28	243.2	363.6	437.7	8.93
2015-02-11 12:30:00	49673	632.9	61.63	245.6	369.1	447.7	9.7
2015-02-11 13:00:00	49674	629.5	61.47	246.8	371.4	443.5	9.58
2015-02-11 13:30:00	49675	616.3	57.76	249.2	375.7	432	11.03
[truncated: 14,357 more rows]
